# Supplementary material for: Leveraging bounded datapoints to classify molecular potency improvements
Source: Royal Society of Chemistry journal article supplement (doi:10.1039/d4md00325j), 2024-01-01
Supplement: d4md00325j1.pdf [file d4md00325j1.pdf]

## Supporting Information

### Leveraging bounded datapoints to classify molecular potency improvements

Zachary Fralish<sup>1</sup>, Paul Skaluba<sup>1</sup>, & Daniel Reker<sup>1\*</sup>

<sup>1</sup> *Department of Biomedical Engineering, Duke University, Durham, NC 27708, USA*

\* Corresponding Author: Daniel Reker, [daniel.reker@duke.edu](mailto:daniel.reker@duke.edu)

## Supplementary Figures

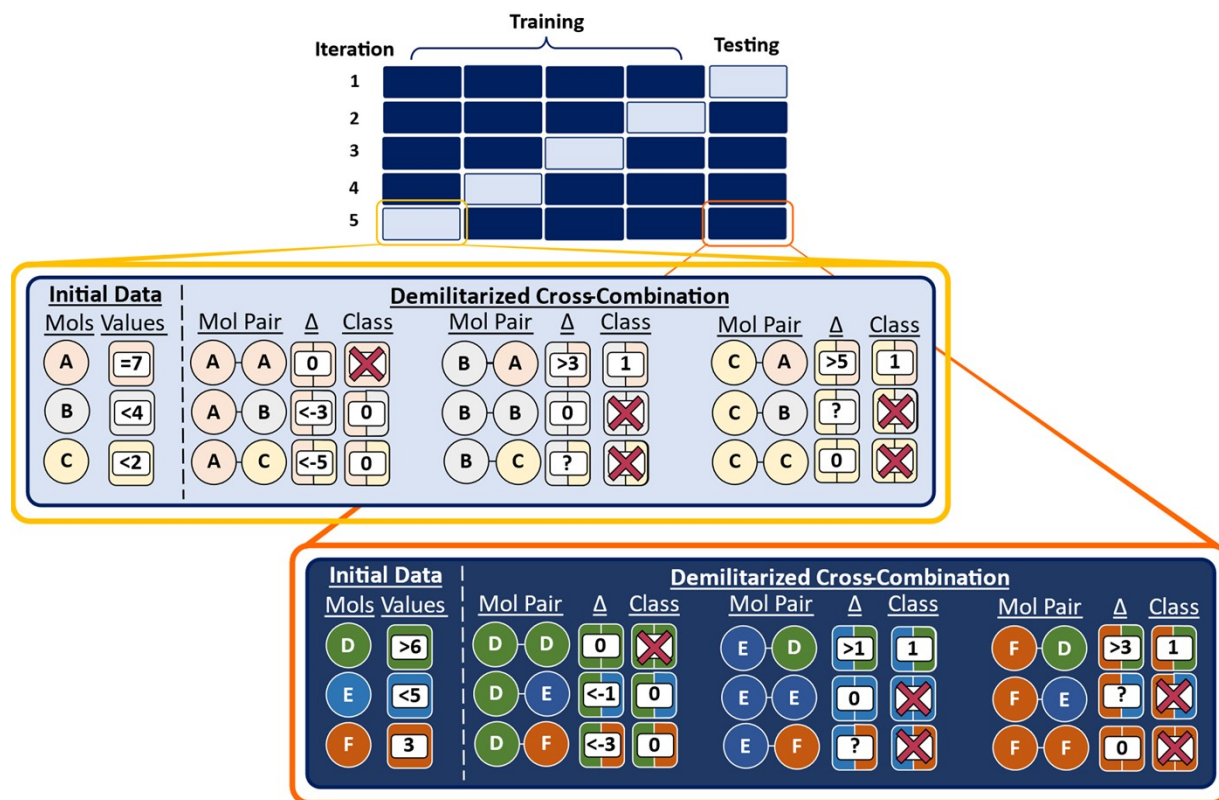

**Supplementary Figure 1: Cross-Validation Scheme for DeltaClassifiers.** Datapoints undergo cross-merging to generate pairs following cross-validation splits to circumvent data leakage risks. As such, each molecule from the original dataset only occurs in molecule pairs within the training or testing data splits, but never both. Additionally, if it is unknown if the property is improved (e.g., both molecules' properties are denoted as '>') or the difference is less than 0.1 pIC<sub>50</sub>, the pair is removed.

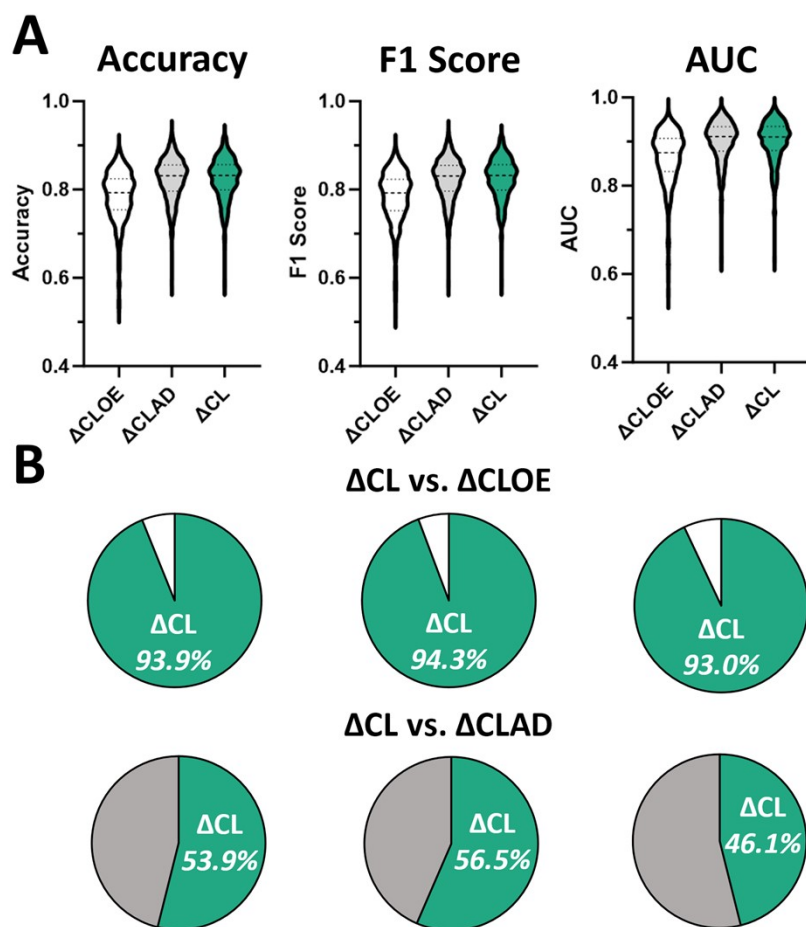

**Supplementary Figure 2: Tree-based DeltaClassifier Performance Following Training with Only Exact Values ( $\Delta$ CLOE), All Data ( $\Delta$ CLAD), and Demilitarized Data ( $\Delta$ CL) Tested on Demilitarized Data. (A) Violin plots of model performance following 1x10 cross-validation for 230 ChEMBL datasets in terms of accuracy, F1 score, and AUC. (B) Pie charts showing percentage of datasets  $\Delta$ CL outcompeted  $\Delta$ CLOE and  $\Delta$ CLAD.**

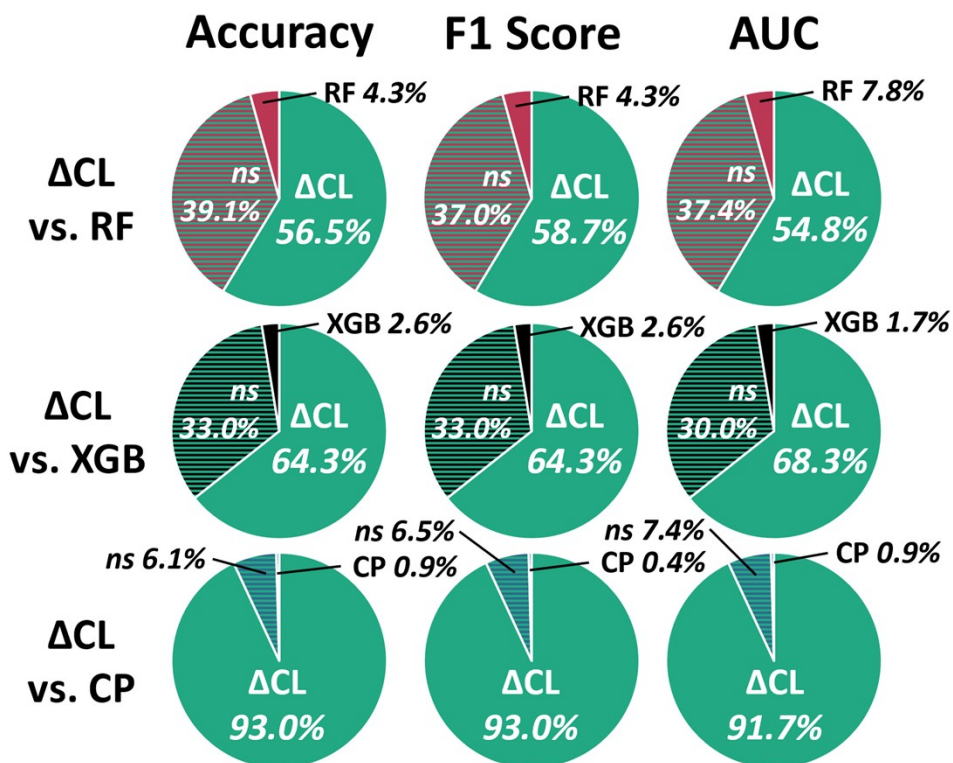

**Supplementary Figure 3: Tree-based DeltaClassifier Performance Compared with Traditional Models.** Pie charts showing percentage of datasets the tree-based DeltaClassifier ( $\Delta$ CL) outcompeted (green), exhibited a non-significant difference (gradient), or underperformed Random Forest (RF, red), XGBoost (XGB, black), and Chemprop (CP, blue) during 3x10-fold cross-validation. Statistical significance from paired t-test for three repeats ( $p < 0.05$ ). Note that the DeltaClassifierLite is based on XGBoost. The difference is that the DeltaClassifiers run these algorithms in classification mode after creating paired training data while the standard implementations, including Random Forest and Chemprop, run in regression mode.

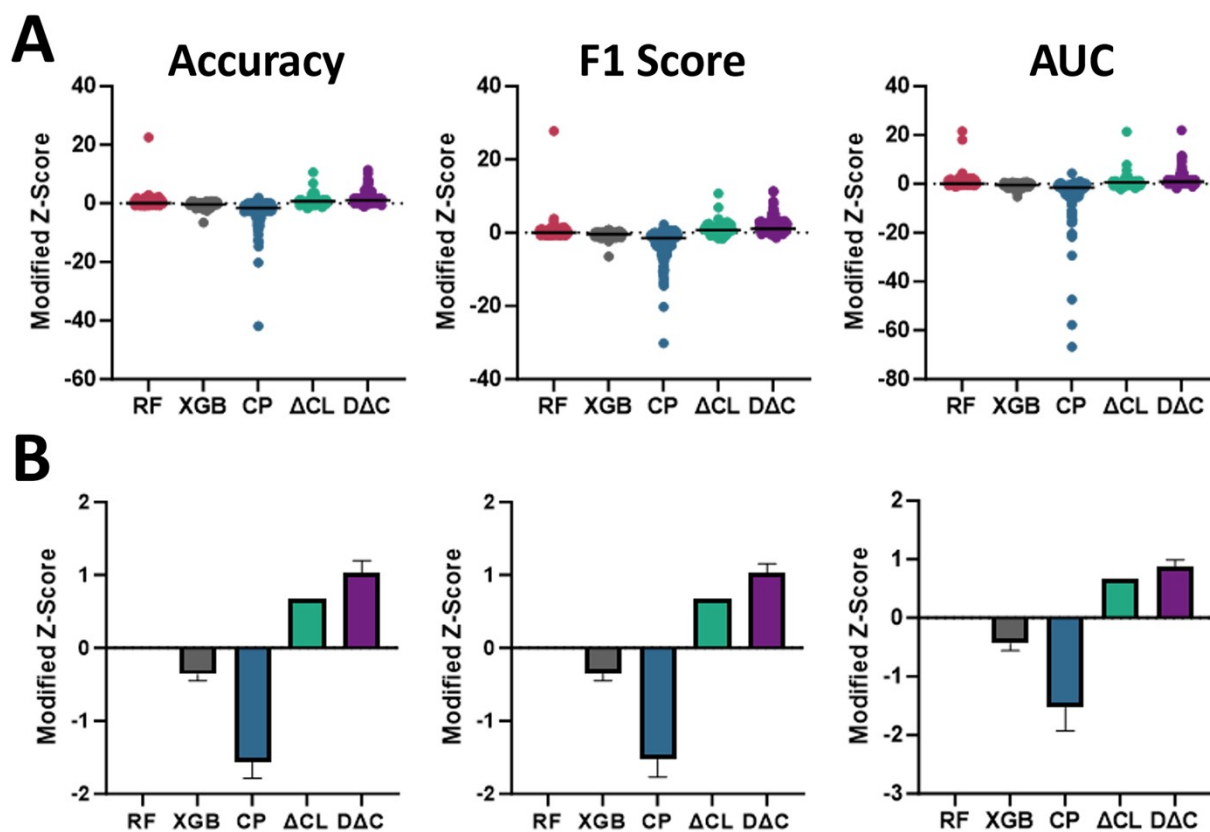

**Supplementary Figure 4: Modified Z-Score Calculations.** (A) Average modified Z-scores for model (Random Forest (RF), XGBoost (XGB), Chemprop (CP), tree-based DeltaClassifier ( $\Delta$ CL), and DeltaClassifier (DAC)) performance following 3x10 cross-validation for 230 ChEMBL datasets in terms of accuracy, F1 score, and AUC. (B) Median and 95% confidence interval of average modified z-scores. Note that the DeepDeltaClassifier uses the neural network implementation of Chemprop and the DeltaClassifierLite is based on XGBoost. The difference is that the DeltaClassifiers run these algorithms in classification mode after creating paired training data while the standard implementations, including Random Forest, run in regression mode.

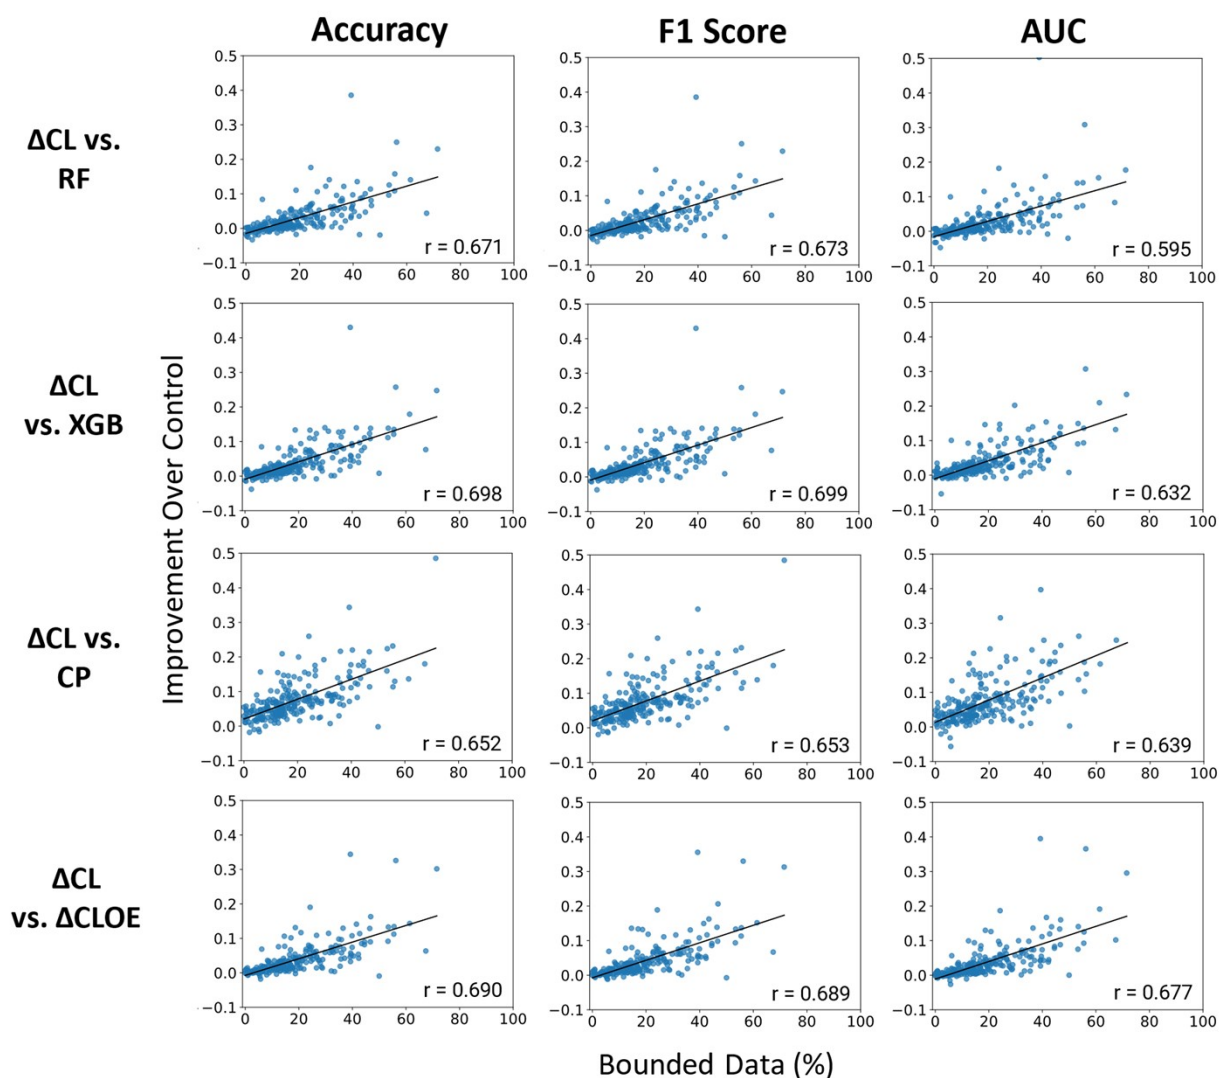

**Supplementary Figure 5: Percent of Bounded Data Correlates with  $\Delta$ CL Improvement Over Traditional Models.** Scatterplots showing correlation and Pearson's  $r$  values of tree-based DeltaClassifier ( $\Delta$ CL) performance improvement over Random Forest (RF), XGBoost (XGB) Chemprop (CP), and tree-based DeltaClassifier trained only on exact values ( $\Delta$ CLOE) following 1x10 cross-validation for 230 ChEMBL datasets with the percent of bounded data within each dataset in terms of accuracy, F1 score, and AUC. Note that the DeepDeltaClassifier uses the neural

network implementation of Chemprop and the DeltaClassifierLite is based on XGBoost. The difference is that the DeltaClassifiers run these algorithms in classification mode after creating paired training data while the standard implementations, including Random Forest, run in regression mode.

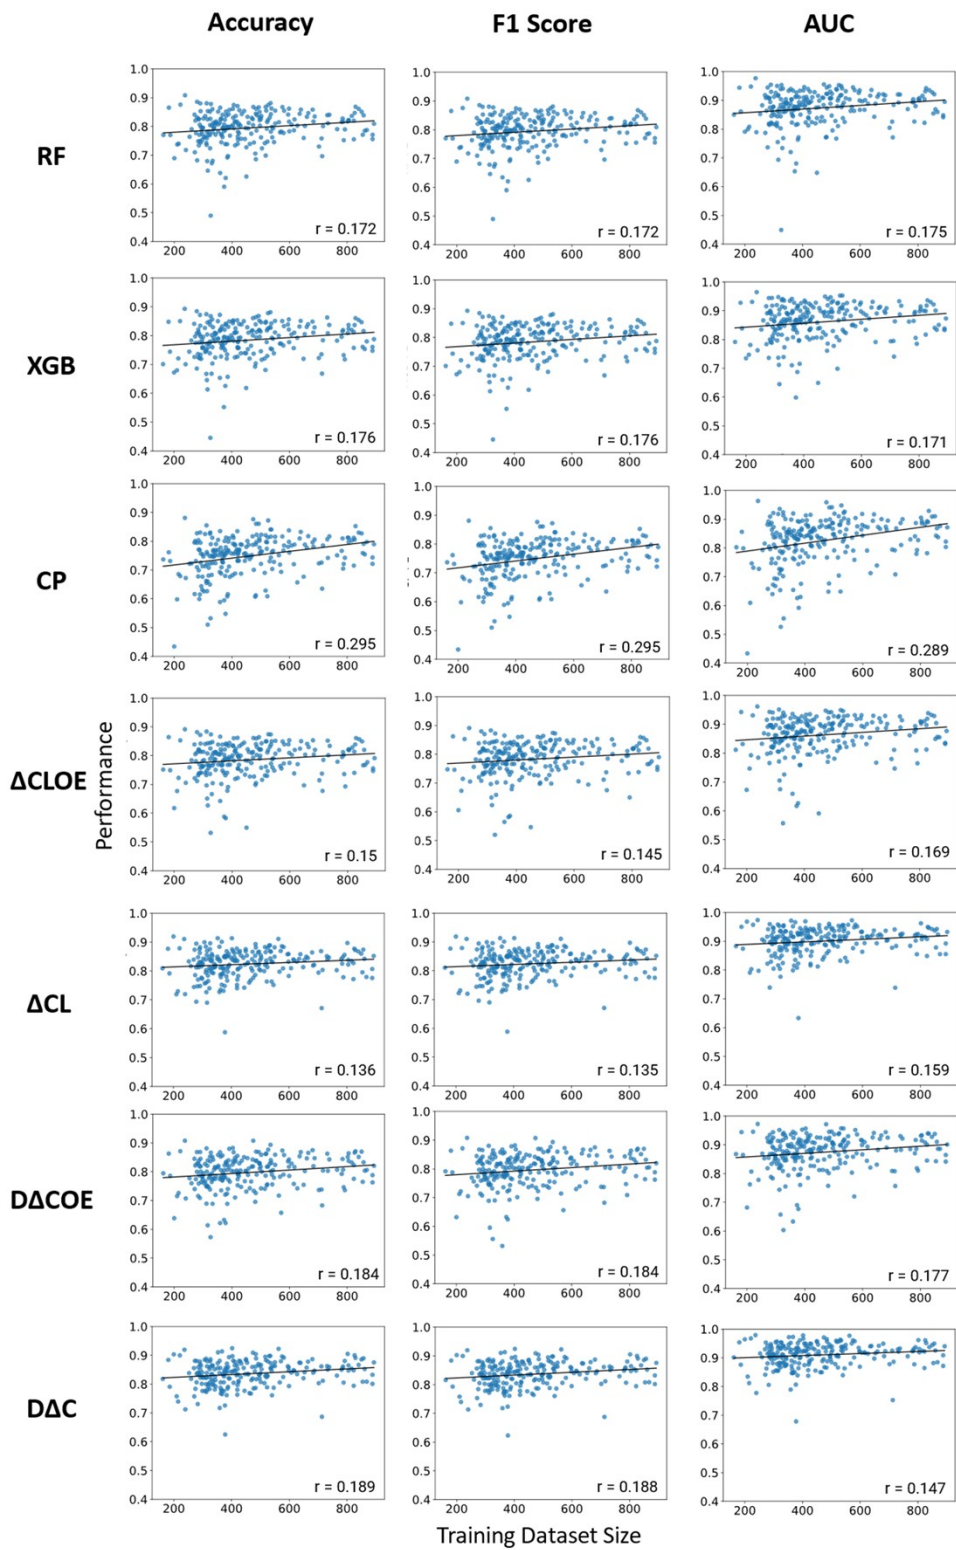



**Supplementary Figure 6: Limited Correlation of Dataset Size with Model Performance.**

Scatterplots showing correlation and Pearson's  $r$  values of model performance following 1x10 cross-validation for 230 ChEMBL datasets with dataset size in terms of accuracy, F1 score, and AUC with dataset size for Random Forest (RF), XGBoost (XGB), Chemprop (CP), tree-based DeltaClassifier trained on only exact data ( $\Delta$ CLOE), tree-based DeltaClassifier ( $\Delta$ CL), deep DeltaClassifier trained on only exact data ( $D\Delta$ COE), and deep DeltaClassifier ( $D\Delta$ C). Note that the DeepDeltaClassifier uses the neural network implementation of Chemprop and the DeltaClassifierLite is based on XGBoost. The difference is that the DeltaClassifiers run these algorithms in classification mode after creating paired training data while the standard implementations, including Random Forest, run in regression mode.

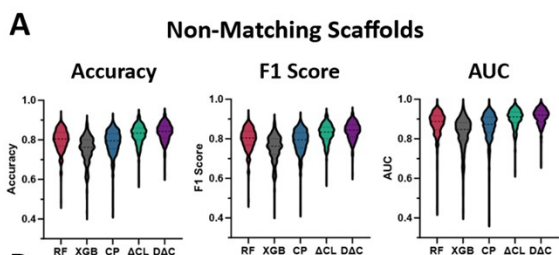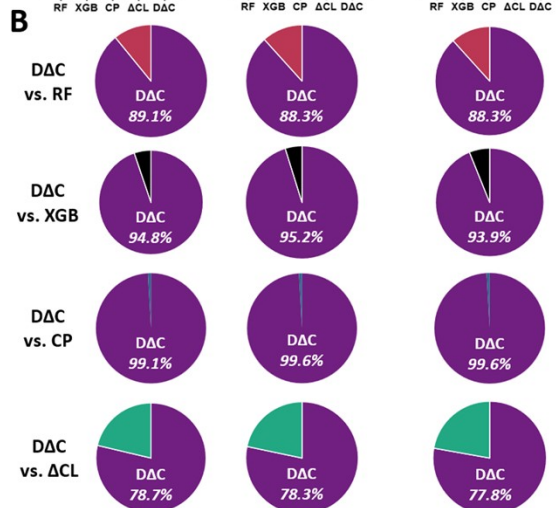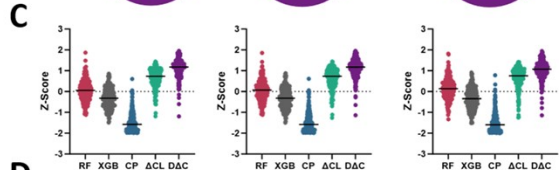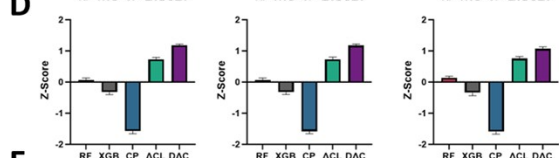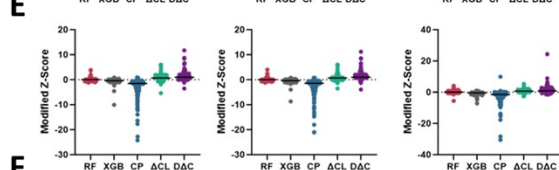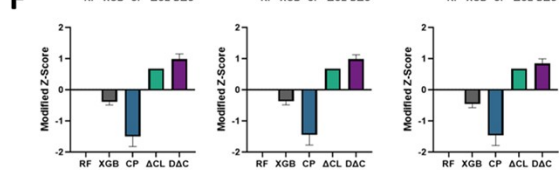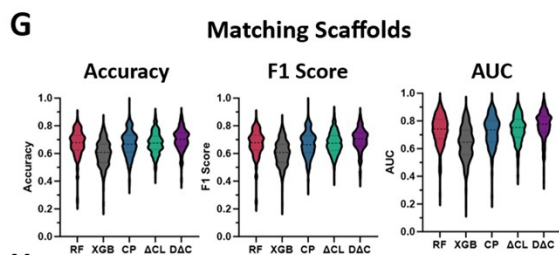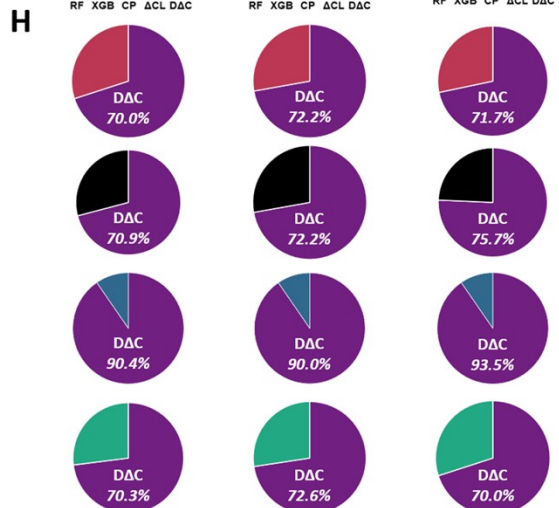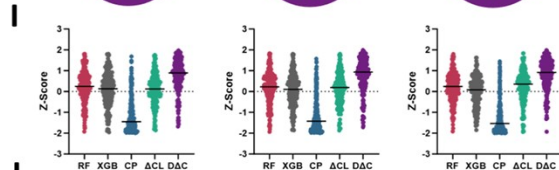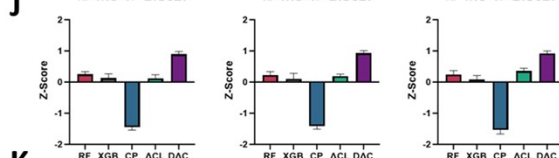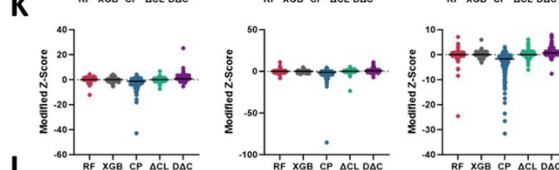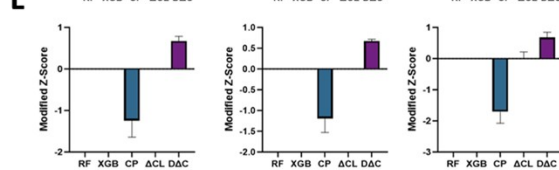

**Supplementary Figure 7: Comparison of DeltaClassifiers with Traditional Methods Across Matching or Non-Matching Scaffolds.** (A) Violin plots of model performance following 1x10 cross-validation for non-matching scaffold pairs for 230 ChEMBL datasets in terms of accuracy, F1-score, and ROCAUC. (B) Pie charts showing percentage of datasets our DeepDeltaClassifier (D $\Delta$ C) outcompeted Random Forest (RF), XGBoost (XGB), Chemprop (CP), and DeltaClassifierLite ( $\Delta$ CL) in terms of accuracy, F1-score, and ROCAUC for non-matching scaffold pairs. (C) Z-scores for model performance in terms of accuracy, F1 score, and ROCAUC for non-matching scaffolds. (D) Median and 95% confidence interval of z-scores for non-matching scaffold pairs. (E) Modified Z-scores for model performance for non-matching scaffold pairs following 1x10 cross-validation for 230 ChEMBL datasets in terms of accuracy, F1 score, and AUC. (F) Median and 95% confidence interval of modified z-scores for non-matching scaffold pairs. (G) Violin plots of model performance following 1x10 cross-validation for matching scaffold pairs for 230 ChEMBL datasets in terms of accuracy, F1-score, and ROCAUC. (H) Pie charts showing percentage of datasets our D $\Delta$ C outcompeted RF, XGB, CP, and  $\Delta$ CL in terms of accuracy, F1-score, and ROCAUC for matching scaffold pairs. (I) Z-scores for model performance in terms of accuracy, F1 score, and ROCAUC for matching scaffold pairs. (J) Median and 95% confidence interval of z-scores for matching scaffold pairs. (K) Modified Z-scores for model performance for matching scaffold pairs following 1x10 cross-validation for 230 ChEMBL datasets in terms of accuracy, F1 score, and AUC. (L) Median and 95% confidence interval of modified z-scores for matching scaffold pairs. Note that the DeepDeltaClassifier uses the neural network implementation of Chemprop and the DeltaClassifierLite is based on XGBoost. The difference is that the DeltaClassifiers run these algorithms in classification mode after creating

paired training data while the standard implementations, including Random Forest, run in regression mode.

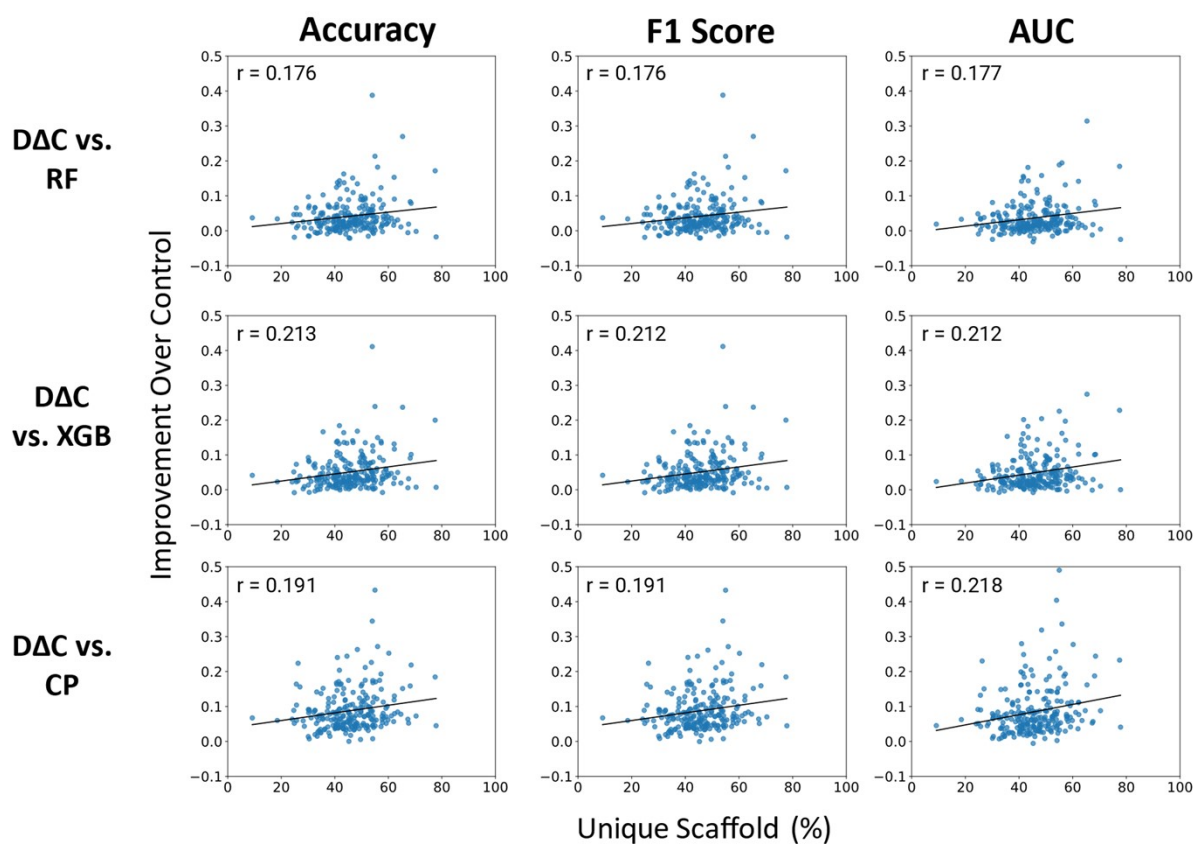

**Supplementary Figure 8: Percent of Unique Scaffolds Show Limited Correlation with DΔC Improvement Over Traditional Models.** Scatterplots showing correlation and Pearson's  $r$  values of average deep DeltaClassifier (DΔC) performance improvement over Random Forest (RF), XGBoost (XGB), and Chemprop (CP) following 3x10 cross-validation for 230 ChEMBL datasets with the percent of unique Murcko scaffolds within each dataset in terms of accuracy, F1 score, and AUC.

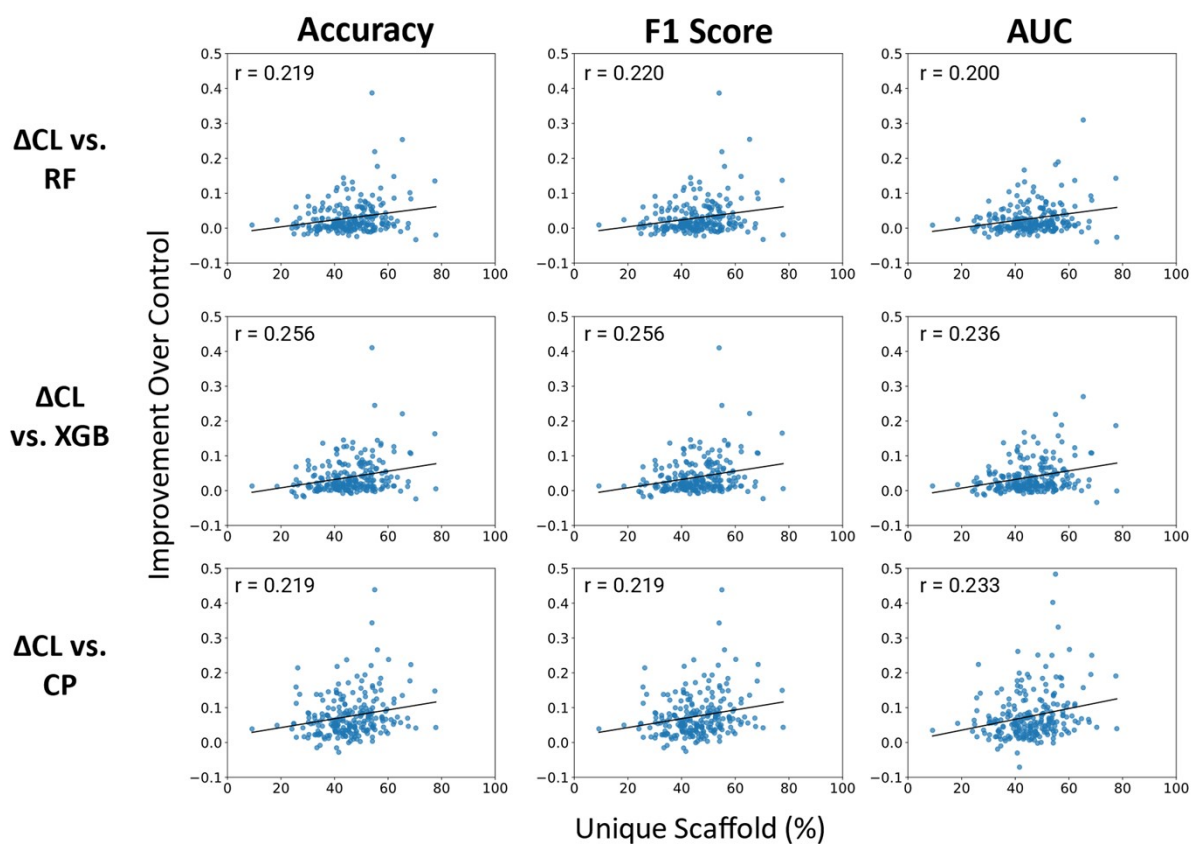

**Supplementary Figure 9: Percent of Unique Scaffolds Show Limited Correlation with  $\Delta$ CL Improvement Over Traditional Models.** Scatterplots showing correlation and Pearson's  $r$  values of average tree-based DeltaClassifier ( $\Delta$ CL) performance improvement over Random Forest (RF), XGBoost (XGB), and Chemprop (CP) following 3x10 cross-validation for 230 ChEMBL datasets with the percent of unique Murcko scaffolds within each dataset in terms of accuracy, F1 score, and AUC.

### Standard Approach

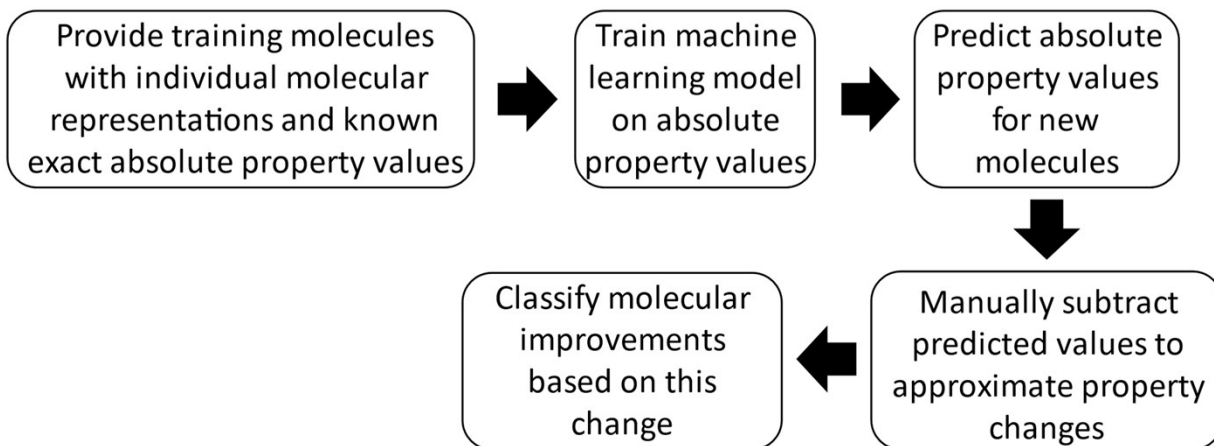

**Supplementary Figure 10: Standard Regression Approach to Classify Potency Improvements.**

### DeltaClassifier Approach

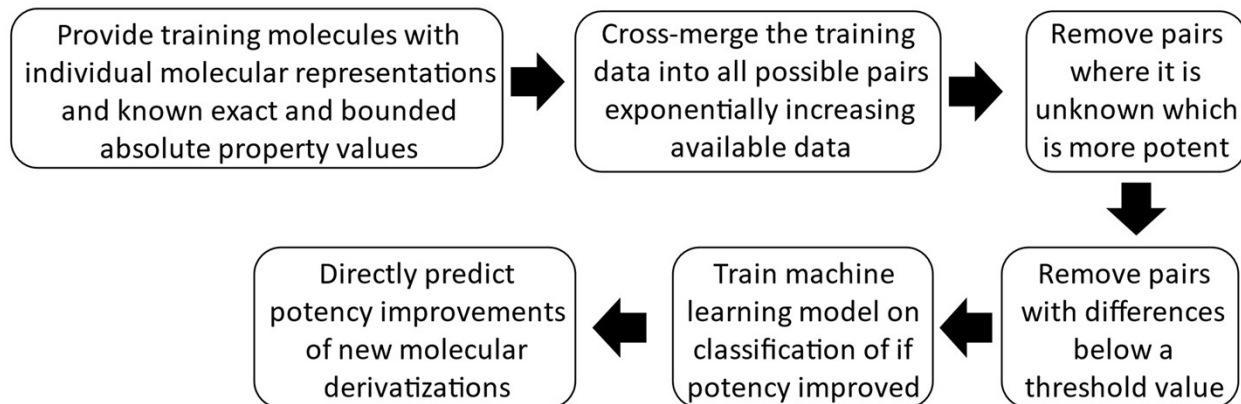

**Supplementary Figure 11: DeltaClassifier Approach to Classify Potency Improvements.**



### Demilitarized Removal of Pairs with Unknown Potency

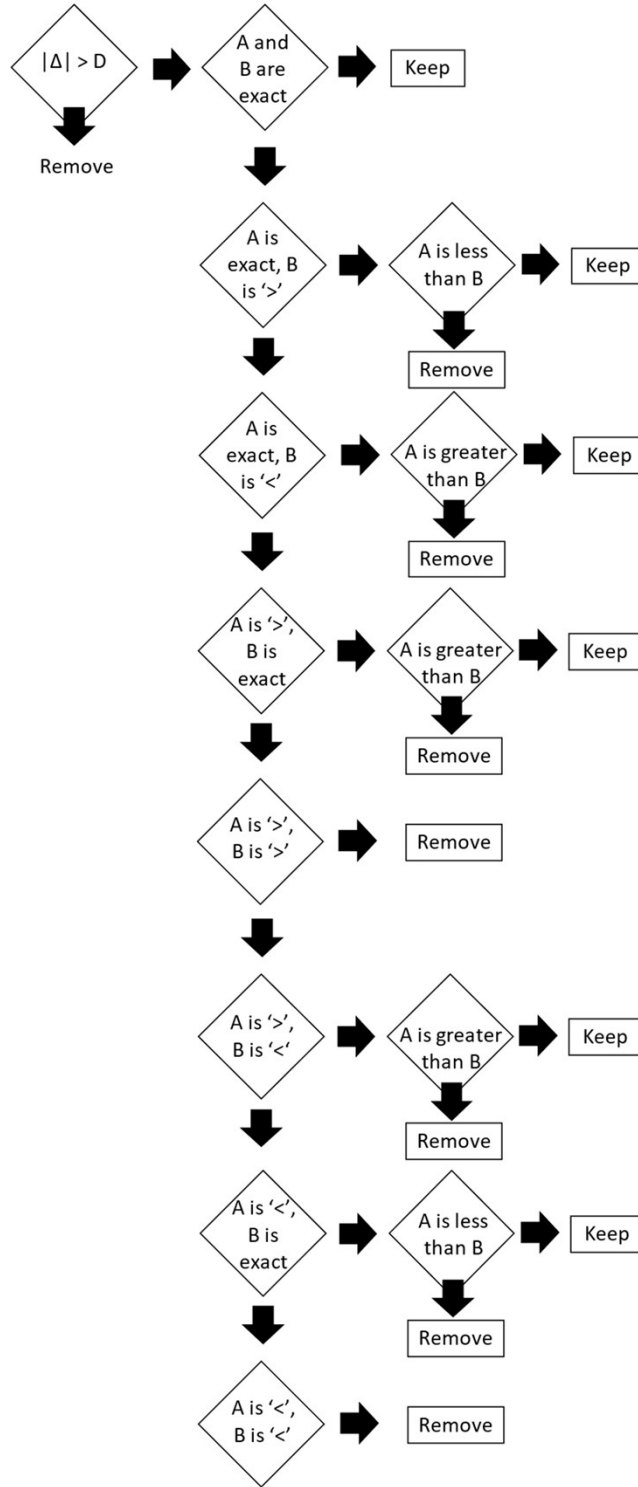

**Supplementary Figure 12: Removal of Pairs with Unknown Potency or Differences Below Demilitarization Threshold.** ‘A’ represents the known potency value for the first molecule within the pair. ‘B’ represents the known potency value for the second molecule within the pair. ‘ $\Delta$ ’ represents the difference between ‘A’ and ‘B’. ‘D’ represents the threshold set for demilitarization. Rightward facing arrows indicate ‘yes’ to the scenario proposed within the diamond while downward facing arrows indicate ‘no’.

# Supplementary Tables

**Supplementary Table 1: Potency Distribution of Available IC<sub>50</sub> Data.** Percentages of exact, bounded, and all datapoints that are above or below 1  $\mu$ M in potency and average number of unique scaffolds in each dataset for our 230 IC<sub>50</sub> datasets.

|                          | Exact | Bounded | All   |
|--------------------------|-------|---------|-------|
| > 1 $\mu$ M              | 63.4% | 12.8%   | 54.4% |
| < 1 $\mu$ M              | 36.6% | 87.2%   | 45.6% |
| Average Unique Scaffolds | 167   | 52      | 208   |

**Supplementary Table 2: Results for 1x10-Fold Cross-Validation Tested on Demilitarized Data.** Average and standard deviation of accuracy, F1 score, and AUC are presented for all models following removal of molecular pairs with differences greater than 0.1 pIC<sub>50</sub> in the test set across our 230 IC<sub>50</sub> datasets. Highest statistically significant overall performances across all models are underlined. Highest statistically significant performances within each model family (traditional models, tree-based  $\Delta$  classifiers, and deep  $\Delta$  classifiers) are bolded.

| Metric   | Traditional Methods<br>(Single Molecule Regression) |                      |                      | Tree-Based $\Delta$ Classifiers<br>(XGBoost) |                                               |                                               | Deep $\Delta$ Classifiers<br>(Chemprop) |                                               |                                               |
|----------|-----------------------------------------------------|----------------------|----------------------|----------------------------------------------|-----------------------------------------------|-----------------------------------------------|-----------------------------------------|-----------------------------------------------|-----------------------------------------------|
|          | RF                                                  | XGB                  | CP                   | $\Delta$ CLOE                                | $\Delta$ CLAD                                 | $\Delta$ CL                                   | $\Delta$ COE                            | $\Delta$ CAD                                  | $\Delta$ C                                    |
| Accuracy | <b>0.795</b><br><u><math>\pm 0.057</math></u>       | 0.785<br>$\pm 0.061$ | 0.748<br>$\pm 0.069$ | 0.785<br>$\pm 0.059$                         | <b>0.824</b><br><u><math>\pm 0.048</math></u> | <b>0.824</b><br><u><math>\pm 0.048</math></u> | 0.797<br>$\pm 0.056$                    | <b>0.836</b><br><u><math>\pm 0.045</math></u> | <b>0.836</b><br><u><math>\pm 0.045</math></u> |
| F1 Score | <b>0.795</b><br><u><math>\pm 0.057</math></u>       | 0.785<br>$\pm 0.061$ | 0.748<br>$\pm 0.069$ | 0.783<br>$\pm 0.062$                         | <b>0.823</b><br><u><math>\pm 0.048</math></u> | <b>0.824</b><br><u><math>\pm 0.048</math></u> | 0.796<br>$\pm 0.059$                    | <b>0.835</b><br><u><math>\pm 0.045</math></u> | <b>0.836</b><br><u><math>\pm 0.045</math></u> |
| ROCAUC   | <b>0.874</b><br><u><math>\pm 0.063</math></u>       | 0.861<br>$\pm 0.069$ | 0.825<br>$\pm 0.081$ | 0.863<br>$\pm 0.065$                         | <b>0.901</b><br><u><math>\pm 0.048</math></u> | <b>0.901</b><br><u><math>\pm 0.047</math></u> | 0.874<br>$\pm 0.060$                    | <b>0.910</b><br><u><math>\pm 0.042</math></u> | <b>0.910</b><br><u><math>\pm 0.042</math></u> |

**Supplementary Table 3: Results for 1x10-Fold Cross-Validation Tested on All Datapoints.**

Average and standard deviation of accuracy, F1 score, and ROCAUC are presented for all models across our 230 IC<sub>50</sub> datasets. Highest statistically significant overall performances across all models are underlined. Highest statistically significant performances within each model family (traditional models, tree-based  $\Delta$  classifiers, and deep  $\Delta$  classifiers) are bolded.

| Metric   | Traditional Methods<br>(Single Molecule Regression) |                      |                      | Tree-Based $\Delta$ Classifiers<br>(XGBoost) |                                               |                                               | Deep $\Delta$ Classifiers<br>(Chemprop) |                                               |                                               |
|----------|-----------------------------------------------------|----------------------|----------------------|----------------------------------------------|-----------------------------------------------|-----------------------------------------------|-----------------------------------------|-----------------------------------------------|-----------------------------------------------|
|          | RF                                                  | XGB                  | CP                   | $\Delta$ CLOE                                | $\Delta$ CLAD                                 | $\Delta$ CL                                   | $\Delta$ COE                            | $\Delta$ CAD                                  | $\Delta$ C                                    |
| Accuracy | <b>0.785</b><br><u><math>\pm 0.055</math></u>       | 0.776<br>$\pm 0.058$ | 0.742<br>$\pm 0.065$ | 0.770<br>$\pm 0.056$                         | <b>0.807</b><br><u><math>\pm 0.048</math></u> | <b>0.804</b><br><u><math>\pm 0.048</math></u> | 0.780<br>$\pm 0.054$                    | <b>0.817</b><br><u><math>\pm 0.045</math></u> | <b>0.815</b><br><u><math>\pm 0.045</math></u> |
| F1 Score | <b>0.780</b><br><u><math>\pm 0.057</math></u>       | 0.770<br>$\pm 0.060$ | 0.736<br>$\pm 0.068$ | 0.764<br>$\pm 0.060$                         | <b>0.803</b><br><u><math>\pm 0.050</math></u> | <b>0.801</b><br><u><math>\pm 0.049</math></u> | 0.775<br>$\pm 0.058$                    | <b>0.813</b><br><u><math>\pm 0.047</math></u> | <b>0.812</b><br><u><math>\pm 0.047</math></u> |
| ROCAUC   | <b>0.857</b><br><u><math>\pm 0.064</math></u>       | 0.845<br>$\pm 0.069$ | 0.810<br>$\pm 0.080$ | 0.848<br>$\pm 0.065$                         | <b>0.886</b><br><u><math>\pm 0.050</math></u> | <b>0.885</b><br><u><math>\pm 0.050</math></u> | 0.859<br>$\pm 0.060$                    | <b>0.896</b><br><u><math>\pm 0.046</math></u> | <b>0.895</b><br><u><math>\pm 0.045</math></u> |

**Supplementary Table 4: Results for 1x10-Fold Cross-Validation Tested Without Same Molecule Pairs.** Average and standard deviation of accuracy, F1 score, and ROCAUC are presented for all models following removal of molecular pairs of the same molecule in the test set across our 230 IC<sub>50</sub> datasets. Highest statistically significant overall performances across all models are underlined. Highest statistically significant performances within each model family (traditional models, tree-based  $\Delta$  classifiers, and deep  $\Delta$  classifiers) are bolded.

| Metric   | Traditional Methods<br>(Single Molecule Regression) |                      |                      | Tree-Based $\Delta$ Classifiers<br>(XGBoost) |                                               |                                               | Deep $\Delta$ Classifiers<br>(Chemprop) |                                               |                                               |
|----------|-----------------------------------------------------|----------------------|----------------------|----------------------------------------------|-----------------------------------------------|-----------------------------------------------|-----------------------------------------|-----------------------------------------------|-----------------------------------------------|
|          | RF                                                  | XGB                  | CP                   | $\Delta$ CLOE                                | $\Delta$ CLAD                                 | $\Delta$ CL                                   | $\Delta$ COE                            | $\Delta$ CAD                                  | $\Delta$ C                                    |
| Accuracy | <b>0.781</b><br><u><math>\pm 0.057</math></u>       | 0.771<br>$\pm 0.060$ | 0.736<br>$\pm 0.067$ | 0.772<br>$\pm 0.058$                         | <b>0.811</b><br><u><math>\pm 0.049</math></u> | <b>0.81</b><br><u><math>\pm 0.049</math></u>  | 0.784<br>$\pm 0.055$                    | <b>0.822</b><br><u><math>\pm 0.046</math></u> | <b>0.822</b><br><u><math>\pm 0.046</math></u> |
| F1 Score | <b>0.780</b><br><u><math>\pm 0.057</math></u>       | 0.770<br>$\pm 0.060$ | 0.736<br>$\pm 0.068$ | 0.769<br>$\pm 0.061$                         | <b>0.809</b><br><u><math>\pm 0.050</math></u> | <b>0.81</b><br><u><math>\pm 0.049</math></u>  | 0.782<br>$\pm 0.058$                    | <b>0.821</b><br><u><math>\pm 0.047</math></u> | <b>0.821</b><br><u><math>\pm 0.047</math></u> |
| ROCAUC   | <b>0.861</b><br><u><math>\pm 0.064</math></u>       | 0.848<br>$\pm 0.070$ | 0.813<br>$\pm 0.081$ | 0.850<br>$\pm 0.066$                         | <b>0.889</b><br><u><math>\pm 0.050</math></u> | <b>0.889</b><br><u><math>\pm 0.050</math></u> | 0.862<br>$\pm 0.061$                    | <b>0.899</b><br><u><math>\pm 0.045</math></u> | <b>0.898</b><br><u><math>\pm 0.045</math></u> |

**Supplementary Table 5: Demilitarization Parameter Optimization for 1x10-Fold Cross-Validation Tested.** Average and standard deviation of rankings of z-scores for accuracy, F1 score, and ROCAUC are presented for all models across our 230 IC<sub>50</sub> datasets. Highest statistically significant performances across all models are underlined and bolded.

|          | Deep $\Delta$ Classifiers<br>(Chemprop)     |                       |                       |
|----------|---------------------------------------------|-----------------------|-----------------------|
| Metric   | 0.1 pIC <sub>50</sub>                       | 0.5 pIC <sub>50</sub> | 1.0 pIC <sub>50</sub> |
| Accuracy | <u><b>0.815</b></u><br><u><b>±0.045</b></u> | 0.812<br>±0.046       | 0.807<br>±0.049       |
| F1 Score | <u><b>0.812</b></u><br><u><b>±0.047</b></u> | 0.81<br>±0.048        | 0.804<br>±0.05        |
| ROCAUC   | <u><b>0.895</b></u><br><u><b>±0.045</b></u> | 0.893<br>±0.047       | 0.89<br>±0.051        |

**Supplementary Table 6: Demilitarization Parameter Optimization for 1x10-Fold Cross-Validation Tested Without Same Molecule Pairs.** Average and standard deviation of rankings of z-scores for accuracy, F1 score, and ROCAUC are presented for all models across our 230 IC<sub>50</sub> datasets. Highest statistically significant performances across all models are underlined and bolded.

|          | Deep $\Delta$ Classifiers<br>(Chemprop)     |                       |                       |
|----------|---------------------------------------------|-----------------------|-----------------------|
| Metric   | 0.1 pIC <sub>50</sub>                       | 0.5 pIC <sub>50</sub> | 1.0 pIC <sub>50</sub> |
| Accuracy | <u><b>0.822</b></u><br><u><b>±0.046</b></u> | 0.819<br>±0.047       | 0.814<br>±0.05        |
| F1 Score | <u><b>0.821</b></u><br><u><b>±0.046</b></u> | 0.819<br>±0.047       | 0.813<br>±0.05        |
| ROCAUC   | <u><b>0.898</b></u><br><u><b>±0.045</b></u> | 0.897<br>±0.047       | 0.893<br>±0.051       |

**Supplementary Table 7: Y-Shuffling Adversarial Control Experiment Collapses Model Performance.** Average and standard deviation of accuracy, F1 score, and ROCAUC are presented

for 1x10-fold cross-validation following Y-shuffling across our 230 IC<sub>50</sub> datasets. Y-shuffling destroys the correlation between input and output variables and therefore creates a more “random” model with an accuracy, F1-score, and ROC-AUC close to 0.5.

| Metric   | $\Delta$ Classifiers (after Y-shuffling) |                      |
|----------|------------------------------------------|----------------------|
|          | $\Delta$ CL                              | D $\Delta$ C         |
| Accuracy | 0.554<br>$\pm 0.052$                     | 0.551<br>$\pm 0.053$ |
| F1 Score | 0.544<br>$\pm 0.052$                     | 0.542<br>$\pm 0.052$ |
| ROCAUC   | 0.578<br>$\pm 0.074$                     | 0.577<br>$\pm 0.077$ |

**Supplementary Table 8: Ranking of Model Performance for 3x10-Fold Cross-Validation Tested on Demilitarized Data.** Average and standard deviation of rankings of z-scores for accuracy, F1 score, and ROCAUC are presented for all models across our 230 IC<sub>50</sub> datasets.

| Metric   | Traditional Methods<br>(Single Molecule Regression) |                      |                      | Deep $\Delta$ Classifiers<br>(Chemprop) |                      |
|----------|-----------------------------------------------------|----------------------|----------------------|-----------------------------------------|----------------------|
|          | RF                                                  | XGB                  | CP                   | $\Delta$ CL                             | D $\Delta$ C         |
| Accuracy | 2.907<br>$\pm 0.799$                                | 3.837<br>$\pm 0.595$ | 4.835<br>$\pm 0.560$ | 2.130<br>$\pm 0.724$                    | 1.291<br>$\pm 0.652$ |
| F1 Score | 2.913<br>$\pm 0.801$                                | 3.841<br>$\pm 0.593$ | 4.830<br>$\pm 0.578$ | 2.128<br>$\pm 0.716$                    | 1.287<br>$\pm 0.637$ |
| ROCAUC   | 2.857<br>$\pm 0.788$                                | 3.865<br>$\pm 0.587$ | 4.813<br>$\pm 0.564$ | 2.091<br>$\pm 0.839$                    | 1.374<br>$\pm 0.705$ |

**Supplementary Table 9: Performance of k-NN Approach Compared to DeltaClassifiers.** Average and standard deviation of accuracy, F1 score, and ROCAUC are presented for 1x10-fold cross-validation following removal of molecular pairs with differences greater than 0.1 pIC<sub>50</sub> in the test set across our 230 IC<sub>50</sub> datasets. Highest statistically significant overall performances

across all models are underlined. Statistically significant improvements compared to the k-nearest neighbours algorithm (k-NN) are bolded.

|          | Parameter Free       | $\Delta$ Classifiers                          |                                               |
|----------|----------------------|-----------------------------------------------|-----------------------------------------------|
| Metric   | k-NN                 | $\Delta$ CL                                   | D $\Delta$ C                                  |
| Accuracy | 0.781<br>$\pm 0.064$ | <b>0.824</b><br><b><math>\pm 0.048</math></b> | <b>0.836</b><br><b><math>\pm 0.045</math></b> |
| F1 Score | 0.780<br>$\pm 0.066$ | <b>0.824</b><br><b><math>\pm 0.048</math></b> | <b>0.836</b><br><b><math>\pm 0.045</math></b> |
| ROCAUC   | 0.860<br>$\pm 0.071$ | <b>0.901</b><br><b><math>\pm 0.047</math></b> | <b>0.910</b><br><b><math>\pm 0.042</math></b> |

**Supplementary Table 10: Results for 80-20 Scaffold Split on Demilitarized Data.** Average and standard deviation of accuracy, F1 score, and ROCAUC are presented for five models across our 230 IC<sub>50</sub> datasets. Highest statistically significant overall performances across all models are underlined and bolded.

|          | Traditional Methods<br>(Single Molecule Regression) |                      |                      | $\Delta$ Classifiers |                                               |
|----------|-----------------------------------------------------|----------------------|----------------------|----------------------|-----------------------------------------------|
| Metric   | RF                                                  | XGB                  | CP                   | $\Delta$ CL          | D $\Delta$ C                                  |
| Accuracy | 0.730<br>$\pm 0.074$                                | 0.689<br>$\pm 0.087$ | 0.719<br>$\pm 0.074$ | 0.742<br>$\pm 0.071$ | <b>0.766</b><br><b><math>\pm 0.073</math></b> |
| F1 Score | 0.730<br>$\pm 0.074$                                | 0.689<br>$\pm 0.087$ | 0.718<br>$\pm 0.074$ | 0.742<br>$\pm 0.071$ | <b>0.766</b><br><b><math>\pm 0.072</math></b> |
| ROCAUC   | 0.805<br>$\pm 0.086$                                | 0.753<br>$\pm 0.111$ | 0.790<br>$\pm 0.086$ | 0.814<br>$\pm 0.082$ | <b>0.839</b><br><b><math>\pm 0.084</math></b> |

**Supplementary Table 11: Results for 80-20 Scaffold Split on All Datapoints Without Demilitarization.** Average and standard deviation of accuracy, F1 score, and ROCAUC are presented for five models across our 230 IC<sub>50</sub> datasets. Highest statistically significant overall performances across all models are underlined and bolded.

|  | Traditional Methods<br>(Single Molecule Regression) | $\Delta$ Classifiers |
|--|-----------------------------------------------------|----------------------|
|--|-----------------------------------------------------|----------------------|

| Metric   | RF                   | XGB                  | CP                   |  | $\Delta$ CL          | D $\Delta$ C                                                |
|----------|----------------------|----------------------|----------------------|--|----------------------|-------------------------------------------------------------|
| Accuracy | 0.722<br>$\pm 0.071$ | 0.711<br>$\pm 0.070$ | 0.684<br>$\pm 0.083$ |  | 0.729<br>$\pm 0.069$ | <b><u>0.751</u></b><br><b><u><math>\pm 0.071</math></u></b> |
| F1 Score | 0.718<br>$\pm 0.072$ | 0.707<br>$\pm 0.071$ | 0.680<br>$\pm 0.084$ |  | 0.728<br>$\pm 0.069$ | <b><u>0.750</u></b><br><b><u><math>\pm 0.071</math></u></b> |
| ROCAUC   | 0.792<br>$\pm 0.085$ | 0.778<br>$\pm 0.085$ | 0.742<br>$\pm 0.107$ |  | 0.802<br>$\pm 0.081$ | <b><u>0.826</u></b><br><b><u><math>\pm 0.083</math></u></b> |

**Supplementary Table 12: Results for 80-20 Scaffold Split Without Demilitarization or Same Molecule Pairs.** Average and standard deviation of accuracy, F1 score, and ROCAUC are presented for five models across our 230 IC<sub>50</sub> datasets. Highest statistically significant overall performances across all models are underlined and bolded.

|          | Traditional Methods<br>(Single Molecule Regression) |                      |                      |  | $\Delta$ Classifiers |                                                             |
|----------|-----------------------------------------------------|----------------------|----------------------|--|----------------------|-------------------------------------------------------------|
| Metric   | RF                                                  | XGB                  | CP                   |  | $\Delta$ CL          | D $\Delta$ C                                                |
| Accuracy | 0.719<br>$\pm 0.072$                                | 0.680<br>$\pm 0.084$ | 0.708<br>$\pm 0.071$ |  | 0.732<br>$\pm 0.070$ | <b><u>0.754</u></b><br><b><u><math>\pm 0.071</math></u></b> |
| F1 Score | 0.718<br>$\pm 0.072$                                | 0.680<br>$\pm 0.084$ | 0.707<br>$\pm 0.071$ |  | 0.732<br>$\pm 0.069$ | <b><u>0.754</u></b><br><b><u><math>\pm 0.071</math></u></b> |
| ROCAUC   | 0.793<br>$\pm 0.085$                                | 0.743<br>$\pm 0.108$ | 0.779<br>$\pm 0.085$ |  | 0.803<br>$\pm 0.082$ | <b><u>0.828</u></b><br><b><u><math>\pm 0.084</math></u></b> |

**Supplementary Table 13: Results for 1x10-Fold Cross-Validation Tested Without Same Molecule Pairs and Bounded Data.** Average and standard deviation of accuracy, F1 score, and ROCAUC are presented for all models following removal of molecular pairs of the same molecule and molecular pairs incorporating a molecule with a bounded IC<sub>50</sub> value in the test set across our 230 IC<sub>50</sub> datasets. Highest statistically significant overall performances across all models are underlined. Highest statistically significant performances within each model family (traditional models, tree-based  $\Delta$  classifiers, and deep  $\Delta$  classifiers) are bolded.



|          | Traditional Methods<br>(Single Molecule Regression)         |                      |                      | Tree-Based $\Delta$ Classifiers<br>(XGBoost)         |                      |                      | Deep $\Delta$ Classifiers<br>(Chemprop)                     |                                                             |                                                             |
|----------|-------------------------------------------------------------|----------------------|----------------------|------------------------------------------------------|----------------------|----------------------|-------------------------------------------------------------|-------------------------------------------------------------|-------------------------------------------------------------|
| Metric   | RF                                                          | XGB                  | CP                   | $\Delta$ CLOE                                        | $\Delta$ CLAD        | $\Delta$ CL          | $\Delta$ COE                                                | $\Delta$ CAD                                                | $\Delta$ C                                                  |
| Accuracy | <b><u>0.791</u></b><br><b><u><math>\pm 0.047</math></u></b> | 0.784<br>$\pm 0.049$ | 0.747<br>$\pm 0.052$ | <b>0.784</b><br><b><u><math>\pm 0.048</math></u></b> | 0.779<br>$\pm 0.052$ | 0.779<br>$\pm 0.052$ | <b><u>0.792</u></b><br><b><u><math>\pm 0.048</math></u></b> | <b><u>0.790</u></b><br><b><u><math>\pm 0.049</math></u></b> | <b><u>0.791</u></b><br><b><u><math>\pm 0.049</math></u></b> |
| F1 Score | <b><u>0.790</u></b><br><b><u><math>\pm 0.048</math></u></b> | 0.782<br>$\pm 0.050$ | 0.746<br>$\pm 0.053$ | <b>0.781</b><br><b><u><math>\pm 0.050</math></u></b> | 0.777<br>$\pm 0.054$ | 0.778<br>$\pm 0.053$ | <b><u>0.790</u></b><br><b><u><math>\pm 0.050</math></u></b> | <b><u>0.788</u></b><br><b><u><math>\pm 0.052</math></u></b> | <b><u>0.790</u></b><br><b><u><math>\pm 0.051</math></u></b> |
| ROCAUC   | <b><u>0.872</u></b><br><b><u><math>\pm 0.049</math></u></b> | 0.863<br>$\pm 0.052$ | 0.827<br>$\pm 0.062$ | <b>0.863</b><br><b><u><math>\pm 0.052</math></u></b> | 0.857<br>$\pm 0.058$ | 0.858<br>$\pm 0.057$ | <b><u>0.871</u></b><br><b><u><math>\pm 0.051</math></u></b> | 0.867<br>$\pm 0.053$                                        | 0.867<br>$\pm 0.052$                                        |

**Supplementary Table 14: Results for 1x10-Fold Cross-Validation Tested on Demilitarized Non-Matching Scaffold Pairs.** Average and standard deviation of accuracy, F1 score, and ROCAUC are presented for all models across our 230 IC<sub>50</sub> datasets. Highest statistically significant overall performances across all models are underlined. Highest statistically significant performances within each model family (traditional models, tree-based  $\Delta$  classifiers, and deep  $\Delta$  classifiers) are bolded.

|          | Traditional Methods<br>(Single Molecule Regression)  |                      |                      | Tree-Based $\Delta$ Classifiers<br>(XGBoost) |                                                      |                                                      | Deep $\Delta$ Classifiers<br>(Chemprop) |                                                      |                                                      |
|----------|------------------------------------------------------|----------------------|----------------------|----------------------------------------------|------------------------------------------------------|------------------------------------------------------|-----------------------------------------|------------------------------------------------------|------------------------------------------------------|
| Metric   | RF                                                   | XGB                  | CP                   | $\Delta$ CLOE                                | $\Delta$ CLAD                                        | $\Delta$ CL                                          | $\Delta$ COE                            | $\Delta$ CAD                                         | $\Delta$ C                                           |
| Accuracy | <b>0.797</b><br><b><u><math>\pm 0.058</math></u></b> | 0.787<br>$\pm 0.062$ | 0.751<br>$\pm 0.070$ | 0.787<br>$\pm 0.060$                         | <b>0.826</b><br><b><u><math>\pm 0.049</math></u></b> | <b>0.827</b><br><b><u><math>\pm 0.049</math></u></b> | 0.800<br>$\pm 0.057$                    | <b>0.838</b><br><b><u><math>\pm 0.045</math></u></b> | <b>0.839</b><br><b><u><math>\pm 0.045</math></u></b> |
| F1 Score | <b>0.797</b><br><b><u><math>\pm 0.058</math></u></b> | 0.787<br>$\pm 0.062$ | 0.751<br>$\pm 0.070$ | 0.786<br>$\pm 0.062$                         | <b>0.826</b><br><b><u><math>\pm 0.049</math></u></b> | <b>0.827</b><br><b><u><math>\pm 0.049</math></u></b> | 0.798<br>$\pm 0.059$                    | <b>0.838</b><br><b><u><math>\pm 0.046</math></u></b> | <b>0.838</b><br><b><u><math>\pm 0.045</math></u></b> |
| ROCAUC   | <b>0.875</b><br><b><u><math>\pm 0.063</math></u></b> | 0.863<br>$\pm 0.069$ | 0.828<br>$\pm 0.082$ | 0.865<br>$\pm 0.065$                         | <b>0.903</b><br><b><u><math>\pm 0.048</math></u></b> | <b>0.902</b><br><b><u><math>\pm 0.047</math></u></b> | 0.876<br>$\pm 0.060$                    | <b>0.912</b><br><b><u><math>\pm 0.042</math></u></b> | <b>0.912</b><br><b><u><math>\pm 0.042</math></u></b> |

**Supplementary Table 15: Ranking of Model Performance for 1x10-Fold Cross-Validation Tested on Demilitarized Data for Non-Matching Scaffold Pairs.** Average and standard deviation of rankings of z-scores for accuracy, F1 score, and ROCAUC are presented for all models across our 230 IC<sub>50</sub> datasets.

|  | Traditional Methods | $\Delta$ Classifiers |
|--|---------------------|----------------------|
|--|---------------------|----------------------|

|          | (Single Molecule Regression) |                      |                      | (XGBoost and Chemprop) |                      |
|----------|------------------------------|----------------------|----------------------|------------------------|----------------------|
| Metric   | RF                           | XGB                  | CP                   | $\Delta$ CL            | $\Delta$ DC          |
| Accuracy | 2.961<br>$\pm 0.820$         | 3.778<br>$\pm 0.709$ | 4.796<br>$\pm 0.596$ | 2.089<br>$\pm 0.766$   | 1.376<br>$\pm 0.766$ |
| F1 Score | 2.941<br>$\pm 0.834$         | 3.774<br>$\pm 0.711$ | 4.8<br>$\pm 0.594$   | 2.098<br>$\pm 0.785$   | 1.387<br>$\pm 0.761$ |
| ROCAUC   | 2.863<br>$\pm 0.830$         | 3.82<br>$\pm 0.702$  | 4.785<br>$\pm 0.593$ | 2.133<br>$\pm 0.839$   | 1.400<br>$\pm 0.761$ |

**Supplementary Table 16: Results for 1x10-Fold Cross-Validation Tested on Demilitarized Matching Scaffold Pairs.** Average and standard deviation of accuracy, F1 score, and ROCAUC are presented for all models across our 230 IC<sub>50</sub> datasets. Highest statistically significant overall performances across all models are underlined. Highest statistically significant performances within each model family (traditional models, tree-based  $\Delta$  classifiers, and deep  $\Delta$  classifiers) are bolded.

|          | Traditional Methods<br>(Single Molecule Regression) |                             |                      | Tree-Based $\Delta$ Classifiers<br>(XGBoost) |                             |                             | Deep $\Delta$ Classifiers<br>(Chemprop) |                                    |                                    |
|----------|-----------------------------------------------------|-----------------------------|----------------------|----------------------------------------------|-----------------------------|-----------------------------|-----------------------------------------|------------------------------------|------------------------------------|
| Metric   | RF                                                  | XGB                         | CP                   | $\Delta$ CLOE                                | $\Delta$ CLAD               | $\Delta$ CL                 | $\Delta$ COE                            | $\Delta$ CAD                       | $\Delta$ C                         |
| Accuracy | <b>0.670</b><br>$\pm 0.099$                         | <b>0.670</b><br>$\pm 0.093$ | 0.601<br>$\pm 0.097$ | 0.657<br>$\pm 0.087$                         | <b>0.674</b><br>$\pm 0.084$ | <b>0.675</b><br>$\pm 0.080$ | 0.678<br>$\pm 0.092$                    | <u><b>0.701</b></u><br>$\pm 0.085$ | <u><b>0.699</b></u><br>$\pm 0.083$ |
| F1 Score | <b>0.668</b><br>$\pm 0.101$                         | <b>0.667</b><br>$\pm 0.095$ | 0.601<br>$\pm 0.097$ | 0.635<br>$\pm 0.107$                         | 0.660<br>$\pm 0.092$        | <b>0.676</b><br>$\pm 0.079$ | 0.669<br>$\pm 0.102$                    | 0.695<br>$\pm 0.088$               | <u><b>0.699</b></u><br>$\pm 0.083$ |
| ROCAUC   | <b>0.733</b><br>$\pm 0.114$                         | 0.723<br>$\pm 0.116$        | 0.638<br>$\pm 0.124$ | 0.720<br>$\pm 0.108$                         | <b>0.744</b><br>$\pm 0.100$ | <b>0.744</b><br>$\pm 0.099$ | 0.740<br>$\pm 0.114$                    | <u><b>0.768</b></u><br>$\pm 0.099$ | <u><b>0.767</b></u><br>$\pm 0.098$ |

**Supplementary Table 17: Ranking of Model Performance for 1x10-Fold Cross-Validation Tested on Demilitarized Data for Matching Scaffold Pairs.** Average and standard deviation of rankings of z-scores for accuracy, F1 score, and ROCAUC are presented for all models across our 230 IC<sub>50</sub> datasets.

|  | Traditional Methods<br>(Single Molecule Regression) | Deep $\Delta$ Classifiers<br>(Chemprop) |
|--|-----------------------------------------------------|-----------------------------------------|
|--|-----------------------------------------------------|-----------------------------------------|

| Metric   | RF                   | XGB                  | CP                   | $\Delta$ CL          | D $\Delta$ C         |
|----------|----------------------|----------------------|----------------------|----------------------|----------------------|
| Accuracy | 2.748<br>$\pm 1.149$ | 2.941<br>$\pm 1.222$ | 4.398<br>$\pm 1.046$ | 2.989<br>$\pm 1.183$ | 1.924<br>$\pm 1.190$ |
| F1 Score | 2.772<br>$\pm 1.145$ | 2.983<br>$\pm 1.236$ | 4.370<br>$\pm 1.078$ | 2.952<br>$\pm 1.192$ | 1.924<br>$\pm 1.208$ |
| ROCAUC   | 2.757<br>$\pm 1.122$ | 3.100<br>$\pm 1.173$ | 4.498<br>$\pm 0.981$ | 2.759<br>$\pm 1.216$ | 1.887<br>$\pm 1.155$ |

**Supplementary Table 18: Model Performance for Enzyme Class 1.** Average and standard deviation of accuracy, F1 score, and ROCAUC are presented for all models across our 28 IC<sub>50</sub> datasets for targets in enzyme class 1. Statistically significant performances over traditional methods are bolded.

| Metric   | Traditional Methods<br>(Single Molecule Regression) |                      |                      | Deep $\Delta$ Classifiers<br>(Chemprop)       |                                               |
|----------|-----------------------------------------------------|----------------------|----------------------|-----------------------------------------------|-----------------------------------------------|
|          | RF                                                  | XGB                  | CP                   | $\Delta$ CL                                   | D $\Delta$ C                                  |
| Accuracy | 0.792<br>$\pm 0.066$                                | 0.783<br>$\pm 0.071$ | 0.747<br>$\pm 0.069$ | <b>0.822</b><br><b><math>\pm 0.049</math></b> | <b>0.837</b><br><b><math>\pm 0.039</math></b> |
| F1 Score | 0.792<br>$\pm 0.066$                                | 0.783<br>$\pm 0.071$ | 0.747<br>$\pm 0.069$ | <b>0.823</b><br><b><math>\pm 0.049</math></b> | <b>0.837</b><br><b><math>\pm 0.039</math></b> |
| ROCAUC   | 0.869<br>$\pm 0.071$                                | 0.857<br>$\pm 0.080$ | 0.821<br>$\pm 0.083$ | <b>0.899</b><br><b><math>\pm 0.047</math></b> | <b>0.910</b><br><b><math>\pm 0.035</math></b> |

**Supplementary Table 19: Model Performance for Enzyme Class 2.** Average and standard deviation of accuracy, F1 score, and ROCAUC are presented for all models across our 69 IC<sub>50</sub> datasets for targets in enzyme class 2. Statistically significant performances over traditional methods are bolded.

| Metric   | Traditional Methods<br>(Single Molecule Regression) |                      |                      | Deep $\Delta$ Classifiers<br>(Chemprop)       |                                               |
|----------|-----------------------------------------------------|----------------------|----------------------|-----------------------------------------------|-----------------------------------------------|
|          | RF                                                  | XGB                  | CP                   | $\Delta$ CL                                   | D $\Delta$ C                                  |
| Accuracy | 0.795<br>$\pm 0.051$                                | 0.786<br>$\pm 0.052$ | 0.749<br>$\pm 0.065$ | <b>0.824</b><br><b><math>\pm 0.047</math></b> | <b>0.835</b><br><b><math>\pm 0.046</math></b> |
| F1 Score | 0.795<br>$\pm 0.051$                                | 0.786<br>$\pm 0.052$ | 0.749<br>$\pm 0.065$ | <b>0.824</b><br><b><math>\pm 0.047</math></b> | <b>0.834</b><br><b><math>\pm 0.046</math></b> |
| ROCAUC   | 0.873                                               | 0.862                | 0.826                | <b>0.900</b>                                  | <b>0.908</b>                                  |

|  |        |        |        |  |               |               |
|--|--------|--------|--------|--|---------------|---------------|
|  | ±0.055 | ±0.056 | ±0.077 |  | <b>±0.044</b> | <b>±0.042</b> |
|--|--------|--------|--------|--|---------------|---------------|

**Supplementary Table 20: Model Performance for Enzyme Class 3.** Average and standard deviation of accuracy, F1 score, and ROCAUC are presented for all models across our 73 IC<sub>50</sub> datasets for targets in enzyme class 3. Statistically significant performances over traditional methods are bolded.

| Metric   | Traditional Methods<br>(Single Molecule Regression) |                 |                 | Deep $\Delta$ Classifiers<br>(Chemprop) |                               |
|----------|-----------------------------------------------------|-----------------|-----------------|-----------------------------------------|-------------------------------|
|          | RF                                                  | XGB             | CP              | $\Delta$ CL                             | D $\Delta$ C                  |
| Accuracy | 0.797<br>±0.062                                     | 0.786<br>±0.067 | 0.749<br>±0.074 | <b>0.829</b><br><b>±0.043</b>           | <b>0.841</b><br><b>±0.042</b> |
| F1 Score | 0.797<br>±0.062                                     | 0.785<br>±0.067 | 0.749<br>±0.074 | <b>0.829</b><br><b>±0.043</b>           | <b>0.841</b><br><b>±0.042</b> |
| ROCAUC   | 0.876<br>±0.072                                     | 0.862<br>±0.079 | 0.825<br>±0.088 | <b>0.906</b><br><b>±0.042</b>           | <b>0.915</b><br><b>±0.040</b> |

**Supplementary Table 21: Model Performance for Enzyme Class 4.** Accuracy, F1 score, and ROCAUC are presented for all models across our 1 IC<sub>50</sub> dataset for targets in enzyme class 4.

| Metric   | Traditional Methods<br>(Single Molecule Regression) |       |       | Deep $\Delta$ Classifiers<br>(Chemprop) |              |
|----------|-----------------------------------------------------|-------|-------|-----------------------------------------|--------------|
|          | RF                                                  | XGB   | CP    | $\Delta$ CL                             | D $\Delta$ C |
| Accuracy | 0.808                                               | 0.798 | 0.788 | 0.871                                   | 0.879        |
| F1 Score | 0.808                                               | 0.798 | 0.788 | 0.872                                   | 0.879        |
| ROCAUC   | 0.900                                               | 0.891 | 0.881 | 0.941                                   | 0.948        |

**Supplementary Table 22: Model Performance for Enzyme Class 5.** Accuracy, F1 score, and ROCAUC are presented for all models across our 3 IC<sub>50</sub> dataset<sup>2</sup> for targets in enzyme class 5.

| Metric   | Traditional Methods<br>(Single Molecule Regression) |       |       | Deep $\Delta$ Classifiers<br>(Chemprop) |              |
|----------|-----------------------------------------------------|-------|-------|-----------------------------------------|--------------|
|          | RF                                                  | XGB   | CP    | $\Delta$ CL                             | D $\Delta$ C |
| Accuracy | 0.781                                               | 0.777 | 0.788 | 0.860                                   | 0.866        |

|          |        |        |        |  |        |        |
|----------|--------|--------|--------|--|--------|--------|
|          | ±0.059 | ±0.052 | ±0.030 |  | ±0.029 | ±0.017 |
| F1 Score | 0.781  | 0.777  | 0.788  |  | 0.860  | 0.866  |
|          | ±0.059 | ±0.052 | ±0.030 |  | ±0.029 | ±0.017 |
| ROCAUC   | 0.864  | 0.858  | 0.871  |  | 0.931  | 0.939  |
|          | ±0.071 | ±0.070 | ±0.038 |  | ±0.022 | ±0.012 |

**Supplementary Table 23: Related Approaches to Compare Properties of Molecular Pairs.**

| Approach                        | Predictive Target                   | Citation                                                                                                                                                                                                                       |
|---------------------------------|-------------------------------------|--------------------------------------------------------------------------------------------------------------------------------------------------------------------------------------------------------------------------------|
| Siamese neural network          | Molecular similarity                | M. K. Altalib and N. Salim, <i>ACS Omega</i> , 2022, <b>7</b> , 4769–4786.                                                                                                                                                     |
| Siamese neural network          | Bioactivity                         | D. Fernández-Llaneza, S. Ulander, D. Gogishvili, E. Nittinger, H. Zhao and C. Tyrchan, <i>ACS Omega</i> , 2021, <b>6</b> , 11086–11094.                                                                                        |
| Siamese neural network          | Toxicity                            | H. Altae-Tran, B. Ramsundar, A. S. Pappu and V. Pande, <i>ACS Cent Sci</i> , 2017, <b>3</b> , 283–293.                                                                                                                         |
| Siamese neural network          | Drug-drug interactions              | K. Schwarz, A. Allam, N. A. Perez Gonzalez and M. Krauthammer, <i>BMC Bioinformatics</i> , 2021, <b>22</b> , 1–19.                                                                                                             |
| Siamese neural network          | Relative free energy of binding     | A. T. McNutt and D. R. Koes, <i>J Chem Inf Model</i> , 2022, <b>62</b> , 1819–1829.                                                                                                                                            |
| Siamese neural network          | Transcriptional response similarity | M. Jeon, D. Park, J. Lee, H. Jeon, M. Ko, S. Kim, Y. Choi, A.-C. Tan and J. Kang, <i>Bioinformatics</i> , 2019, <b>35</b> , 5249–5256.                                                                                         |
| Siamese Neural Network          | ADMET properties                    | Y. Zhang, J. Menke, J. He, E. Nittinger, C. Tyrchan, O. Koch and H. Zhao, <i>J Cheminform</i> , 2023, <b>15</b> , 75.                                                                                                          |
| Kernel-based ranking algorithms | Potency                             | S. Agarwal, D. Dugar and S. Sengupta, <i>J Chem Inf Model</i> , 2010, <b>50</b> , 716–731.                                                                                                                                     |
| Learning-to-rank framework      | Potency                             | K. L. Saar, W. McCorkindale, D. Fearon, M. Boby, H. Barr, A. Ben-Shmuel, C. M. Consortium, N. London, F. von Delft and J. D. Chodera, <i>Proceedings of the National Academy of Sciences</i> , 2023, <b>120</b> , e2214168120. |
| Learning-to-rank framework      | Potency                             | A. Morris, W. McCorkindale, N. Drayman, J. D. Chodera, S. Tay, N. London and Covid Moonshot Consortium, <i>Chemical Communications</i> , 2021, <b>57</b> , 5909–5912.                                                          |
| QSAR modeling                   | Potency                             | K. Matsumoto, T. Miyao and K. Funatsu, <i>ACS Omega</i> , 2021, <b>6</b> , 11964–11973.                                                                                                                                        |
