# Supplementary material for: Leveraging bounded datapoints to classify molecular potency improvements
Source: Royal Society of Chemistry journal article supplement (doi:10.1039/d4md00325j), 2024-01-01
Supplement: d4md00325j2.xlsx [file d4md00325j2.xlsx]

## Sheet: Accuracy
Dataset	RF	XGB	CP	ΔCLOE	ΔCLAD	ΔCL	DΔCOE	DΔCAD	DΔC
CHEMBL4561	0.7385	0.749	0.6793	0.7316	0.7424	0.7481	0.7202	0.7243	0.7257
CHEMBL202	0.811	0.8082	0.742	0.8013	0.8458	0.8403	0.8029	0.8494	0.8505
CHEMBL217	0.7877	0.7742	0.7563	0.7916	0.8488	0.8501	0.7797	0.8437	0.8416
CHEMBL228	0.8165	0.821	0.7978	0.8094	0.8368	0.8321	0.817	0.845	0.8471
CHEMBL1785	0.8574	0.8489	0.8101	0.8441	0.8571	0.8596	0.8794	0.8895	0.8936
CHEMBL1792	0.7276	0.7387	0.7801	0.7539	0.8695	0.8685	0.8012	0.8812	0.8828
CHEMBL1801	0.6987	0.6807	0.6286	0.7615	0.8241	0.8207	0.7862	0.825	0.829
CHEMBL1806	0.7238	0.7165	0.7648	0.7157	0.8417	0.8453	0.7999	0.8592	0.8516
CHEMBL1966	0.8093	0.7877	0.7895	0.7912	0.852	0.8518	0.8205	0.8769	0.8752
CHEMBL2716	0.7426	0.7461	0.6622	0.7321	0.8451	0.8397	0.7493	0.8218	0.8221
CHEMBL2850	0.7948	0.781	0.7579	0.7832	0.8215	0.8219	0.8029	0.8329	0.8345
CHEMBL3024	0.8471	0.8366	0.8052	0.8386	0.8791	0.8772	0.8663	0.9008	0.9
CHEMBL3234	0.7755	0.7573	0.7321	0.7682	0.7858	0.7825	0.7846	0.8155	0.811
CHEMBL3369	0.7484	0.7362	0.6777	0.7318	0.7474	0.7469	0.7156	0.7317	0.7307
CHEMBL3568	0.8221	0.8243	0.8131	0.8191	0.8169	0.8132	0.8177	0.8309	0.828
CHEMBL3582	0.7732	0.7848	0.6312	0.7624	0.7722	0.7768	0.7831	0.7969	0.8011
CHEMBL3807	0.8545	0.8332	0.7851	0.8391	0.8883	0.8828	0.858	0.8931	0.8918
CHEMBL4204	0.8619	0.8563	0.8376	0.8531	0.8554	0.859	0.8423	0.853	0.8577
CHEMBL4372	0.7625	0.7587	0.6258	0.7844	0.8361	0.8422	0.7602	0.8207	0.8222
CHEMBL4588	0.8464	0.8397	0.8175	0.8295	0.8468	0.8445	0.8654	0.8773	0.878
CHEMBL5080	0.8626	0.8421	0.8407	0.8495	0.8646	0.8666	0.8307	0.8549	0.8561
CHEMBL5285	0.8531	0.8345	0.7947	0.8417	0.8574	0.8625	0.845	0.8664	0.8692
CHEMBL5331	0.7943	0.7675	0.7279	0.7679	0.791	0.7892	0.7692	0.7809	0.7787
CHEMBL5469	0.6258	0.6181	0.7458	0.5495	0.8672	0.8754	0.731	0.8831	0.8866
CHEMBL5697	0.8422	0.8309	0.7984	0.8337	0.8497	0.8515	0.8396	0.8648	0.8592
CHEMBL1250348	0.7897	0.7175	0.7422	0.6928	0.8507	0.8558	0.7358	0.8817	0.8805
CHEMBL1293311	0.6208	0.6255	0.5476	0.5824	0.5886	0.5876	0.6219	0.6104	0.6248
CHEMBL1795186	0.6821	0.6857	0.7096	0.7115	0.7037	0.6934	0.7996	0.8029	0.8063
CHEMBL2189110	0.7825	0.7731	0.708	0.7673	0.7636	0.7649	0.7776	0.8029	0.7994
CHEMBL2216739	0.8398	0.8123	0.8224	0.8298	0.8301	0.8205	0.7898	0.8219	0.8169
CHEMBL3988599	0.7956	0.7566	0.7541	0.762	0.7618	0.773	0.7727	0.7746	0.7762
CHEMBL205	0.8582	0.8486	0.7961	0.8532	0.8631	0.8641	0.8747	0.8879	0.8866
CHEMBL238	0.825	0.8186	0.817	0.8126	0.8381	0.8407	0.8424	0.862	0.8593
CHEMBL239	0.7301	0.7223	0.7229	0.7142	0.7964	0.7943	0.7365	0.8005	0.8032
CHEMBL288	0.8412	0.8387	0.7806	0.839	0.8538	0.8576	0.8359	0.8635	0.8621
CHEMBL1781	0.7824	0.788	0.769	0.7692	0.8408	0.8412	0.8158	0.8485	0.8557
CHEMBL1917	0.7544	0.7594	0.6766	0.7641	0.8124	0.8164	0.7853	0.8504	0.8401
CHEMBL2007	0.7618	0.7457	0.7212	0.7578	0.8033	0.802	0.742	0.8064	0.8073
CHEMBL2563	0.7492	0.7215	0.615	0.7401	0.8424	0.83	0.7089	0.8357	0.8328
CHEMBL3286	0.7819	0.7782	0.7592	0.7978	0.8419	0.8346	0.7969	0.8511	0.8526
CHEMBL3587	0.8155	0.796	0.7664	0.7952	0.8441	0.8409	0.7924	0.8504	0.85
CHEMBL3721	0.5903	0.5519	0.5946	0.5878	0.7321	0.731	0.6324	0.7751	0.7757
CHEMBL3746	0.6462	0.6134	0.51	0.6266	0.6925	0.69	0.6138	0.7809	0.7812
CHEMBL4015	0.8011	0.7838	0.7852	0.7851	0.8052	0.8032	0.804	0.8095	0.8115
CHEMBL4072	0.7848	0.7535	0.7545	0.768	0.8386	0.842	0.8037	0.8501	0.8521
CHEMBL4161	0.8273	0.8234	0.7563	0.8122	0.8122	0.8111	0.8053	0.8053	0.8061
CHEMBL4439	0.8261	0.8142	0.7633	0.821	0.8361	0.8376	0.8176	0.8393	0.8371
CHEMBL4462	0.7796	0.7722	0.7187	0.7639	0.7928	0.7973	0.7826	0.8088	0.8059
CHEMBL4599	0.7571	0.7389	0.6874	0.747	0.8102	0.8139	0.7472	0.8201	0.8243
CHEMBL4766	0.7864	0.7567	0.7201	0.7381	0.8154	0.8397	0.7577	0.8314	0.8486
CHEMBL4835	0.8611	0.8505	0.8191	0.8355	0.8748	0.8748	0.8828	0.8983	0.8969
CHEMBL5491	0.8653	0.8481	0.7614	0.8642	0.8712	0.8768	0.8628	0.8811	0.8839
CHEMBL5543	0.71	0.726	0.6163	0.7216	0.7495	0.7444	0.7398	0.7545	0.7574
CHEMBL5620	0.8235	0.8204	0.8004	0.8214	0.8477	0.8484	0.8221	0.8453	0.8477
CHEMBL6164	0.7455	0.7387	0.7282	0.7479	0.7458	0.7514	0.7792	0.7877	0.7874
CHEMBL1163101	0.6895	0.672	0.4341	0.6176	0.9281	0.9194	0.6384	0.9066	0.9032
CHEMBL1293289	0.7444	0.7335	0.7572	0.7575	0.7444	0.7477	0.8188	0.8224	0.822
CHEMBL2169736	0.7417	0.7202	0.69	0.731	0.8045	0.7996	0.7405	0.8099	0.8034
CHEMBL3638344	0.8677	0.8608	0.8764	0.8613	0.8654	0.8664	0.9077	0.9103	0.9092
CHEMBL4296013	0.817	0.8194	0.7048	0.8018	0.847	0.8479	0.8069	0.8649	0.861
CHEMBL249	0.7706	0.7574	0.7093	0.7654	0.7794	0.7785	0.7778	0.7813	0.7782
CHEMBL261	0.8204	0.797	0.8005	0.8051	0.8716	0.8735	0.8216	0.8865	0.8807
CHEMBL274	0.8026	0.7962	0.7581	0.7994	0.8067	0.8056	0.8105	0.8162	0.8199
CHEMBL338	0.8313	0.8082	0.7944	0.8109	0.8146	0.8123	0.8275	0.8339	0.8358
CHEMBL1871	0.799	0.782	0.7594	0.7875	0.8481	0.8512	0.8062	0.8548	0.8535
CHEMBL1900	0.8034	0.8016	0.7507	0.7994	0.8347	0.8337	0.7939	0.8225	0.8156
CHEMBL1929	0.8023	0.7933	0.7892	0.7998	0.8709	0.8686	0.8042	0.8854	0.8797
CHEMBL2028	0.724	0.7388	0.6497	0.7362	0.7445	0.7399	0.7381	0.779	0.7828
CHEMBL2207	0.7564	0.7397	0.7318	0.7337	0.7396	0.7419	0.7671	0.7745	0.7767
CHEMBL2439	0.7904	0.7829	0.723	0.784	0.8249	0.817	0.7599	0.8146	0.8182
CHEMBL2808	0.8132	0.8158	0.6929	0.8041	0.8392	0.84	0.7742	0.8405	0.8384
CHEMBL2820	0.8747	0.8526	0.8121	0.8604	0.8668	0.8683	0.8676	0.8796	0.8814
CHEMBL2993	0.841	0.841	0.7953	0.8387	0.8404	0.8391	0.8451	0.8508	0.8556
CHEMBL3045	0.7639	0.7442	0.7219	0.759	0.8339	0.833	0.7774	0.839	0.8381
CHEMBL3332	0.8127	0.7809	0.7517	0.7874	0.8168	0.8147	0.7749	0.7854	0.7812
CHEMBL3468	0.817	0.8113	0.7709	0.8065	0.8322	0.838	0.8041	0.8308	0.8309
CHEMBL3535	0.6917	0.7351	0.6081	0.6777	0.8635	0.868	0.6884	0.8727	0.871
CHEMBL3864	0.8308	0.8281	0.7303	0.8305	0.8878	0.8878	0.8271	0.8946	0.8977
CHEMBL3910	0.7829	0.7774	0.7605	0.7746	0.7862	0.7826	0.7852	0.7956	0.7931
CHEMBL4073	0.7933	0.7529	0.7501	0.7822	0.8262	0.8258	0.7889	0.8383	0.8358
CHEMBL4074	0.8216	0.8182	0.8019	0.8218	0.8216	0.8244	0.8285	0.8328	0.8328
CHEMBL4128	0.7905	0.7825	0.751	0.7787	0.7965	0.8027	0.8071	0.8298	0.8295
CHEMBL4662	0.822	0.8238	0.797	0.8191	0.8349	0.8379	0.8374	0.8483	0.8473
CHEMBL5147	0.7621	0.7524	0.7035	0.7587	0.7579	0.7633	0.756	0.7637	0.761
CHEMBL5192	0.783	0.758	0.7658	0.7405	0.7877	0.7904	0.7796	0.8274	0.8317
CHEMBL5408	0.7822	0.7723	0.6933	0.7553	0.8644	0.8691	0.6573	0.8761	0.8795
CHEMBL6115	0.8509	0.8469	0.8271	0.8493	0.8613	0.8598	0.8697	0.8871	0.8856
CHEMBL298	0.8275	0.7956	0.7467	0.8132	0.8223	0.8245	0.7943	0.8187	0.8238
CHEMBL299	0.8175	0.8088	0.8127	0.8202	0.8983	0.8967	0.8513	0.9031	0.9049
CHEMBL339	0.76	0.7195	0.6767	0.6966	0.8188	0.8133	0.7545	0.8234	0.8202
CHEMBL1856	0.8857	0.8845	0.8276	0.8814	0.8951	0.8945	0.8682	0.8803	0.8805
CHEMBL2002	0.8028	0.7922	0.6568	0.7702	0.8307	0.8325	0.7421	0.8318	0.8346
CHEMBL2996	0.8155	0.8181	0.7963	0.811	0.828	0.8261	0.8172	0.8305	0.8318
CHEMBL2998	0.8212	0.8369	0.8115	0.822	0.8267	0.8222	0.8639	0.8634	0.8649
CHEMBL3066	0.8601	0.8563	0.8119	0.8472	0.8617	0.8589	0.8515	0.8666	0.8643
CHEMBL3081	0.8268	0.8376	0.8303	0.8249	0.831	0.8391	0.8357	0.8564	0.8595
CHEMBL3476	0.7961	0.7805	0.7261	0.7817	0.8192	0.812	0.7942	0.8371	0.8354
CHEMBL3524	0.782	0.755	0.7436	0.7718	0.8681	0.8682	0.802	0.8721	0.8729
CHEMBL3691	0.8047	0.8011	0.7875	0.7926	0.8008	0.8007	0.8184	0.8164	0.8191
CHEMBL3891	0.7769	0.7749	0.7312	0.7804	0.7899	0.7855	0.7742	0.784	0.7838
CHEMBL4102	0.7521	0.7323	0.7209	0.7357	0.7766	0.7782	0.7462	0.8126	0.8052
CHEMBL4117	0.6965	0.6682	0.6351	0.6773	0.6692	0.6712	0.683	0.6874	0.6865
CHEMBL4303	0.8709	0.8532	0.8348	0.8616	0.872	0.8774	0.855	0.8678	0.8664
CHEMBL4481	0.7644	0.7605	0.7335	0.7554	0.7489	0.7514	0.7739	0.78	0.7803
CHEMBL4506	0.8434	0.8387	0.7879	0.8394	0.862	0.8533	0.8381	0.8691	0.8713
CHEMBL4696	0.718	0.7006	0.672	0.7054	0.7234	0.7197	0.707	0.7068	0.7122
CHEMBL4895	0.8365	0.8193	0.802	0.8285	0.8359	0.8347	0.8317	0.8532	0.8537
CHEMBL4937	0.8305	0.8431	0.7911	0.8328	0.8408	0.8389	0.8371	0.8471	0.8434
CHEMBL5747	0.8446	0.8391	0.7891	0.8399	0.8503	0.8527	0.8379	0.8642	0.8607
CHEMBL6136	0.7582	0.7352	0.7259	0.7373	0.8645	0.8686	0.7381	0.8591	0.8614
CHEMBL1075138	0.734	0.7246	0.6876	0.719	0.854	0.8478	0.7103	0.8653	0.8647
CHEMBL1921666	0.836	0.8267	0.8251	0.8403	0.8979	0.8994	0.8268	0.8849	0.8842
CHEMBL2146302	0.8681	0.8606	0.8525	0.8608	0.8729	0.8723	0.8712	0.8929	0.8909
CHEMBL2331053	0.6382	0.6534	0.5887	0.6422	0.7251	0.7272	0.6216	0.7153	0.7172
CHEMBL2366517	0.8035	0.8099	0.7616	0.812	0.8227	0.8241	0.8162	0.8509	0.8514
CHEMBL4523582	0.7999	0.8009	0.7577	0.7925	0.8461	0.8468	0.8034	0.8443	0.8432
CHEMBL241	0.7358	0.6672	0.6547	0.6964	0.7934	0.7943	0.689	0.7952	0.7999
CHEMBL254	0.8371	0.8379	0.8124	0.8381	0.8429	0.8469	0.8344	0.8536	0.8568
CHEMBL1855	0.88	0.8718	0.8304	0.8717	0.8735	0.8754	0.8685	0.8793	0.8782
CHEMBL1868	0.7559	0.7474	0.7215	0.7469	0.8098	0.8067	0.7628	0.8333	0.8324
CHEMBL2179	0.6794	0.6457	0.6263	0.6509	0.7247	0.7267	0.748	0.8382	0.8386
CHEMBL2345	0.8244	0.819	0.7779	0.8221	0.8335	0.8336	0.8526	0.8592	0.8558
CHEMBL2425	0.8514	0.8413	0.779	0.8416	0.8502	0.8527	0.8297	0.8407	0.8415
CHEMBL2431	0.8245	0.8102	0.7886	0.8198	0.8428	0.8378	0.8163	0.8404	0.8457
CHEMBL2593	0.8516	0.8501	0.8048	0.8384	0.8486	0.8493	0.8584	0.8689	0.8725
CHEMBL2622	0.8172	0.8104	0.7809	0.8037	0.8217	0.8189	0.8193	0.8383	0.8399
CHEMBL2635	0.7341	0.7239	0.6987	0.7375	0.7752	0.7701	0.7588	0.8236	0.8336
CHEMBL2828	0.8613	0.8642	0.8606	0.8595	0.895	0.893	0.8696	0.9016	0.9041
CHEMBL2959	0.7979	0.7927	0.7626	0.7877	0.8317	0.8324	0.7899	0.8451	0.8467
CHEMBL3474	0.7806	0.7725	0.7622	0.7676	0.8093	0.8026	0.7999	0.82	0.8224
CHEMBL3475	0.7645	0.7432	0.7134	0.7399	0.7497	0.7568	0.7664	0.7704	0.7763
CHEMBL3514	0.8804	0.8744	0.8551	0.8837	0.8859	0.8842	0.8811	0.8885	0.8879
CHEMBL3529	0.8146	0.7995	0.7514	0.8193	0.9099	0.9109	0.7169	0.9231	0.9225
CHEMBL3855	0.8515	0.8489	0.826	0.8441	0.8461	0.848	0.8522	0.8504	0.8518
CHEMBL3869	0.8015	0.8052	0.7883	0.8032	0.8348	0.8382	0.8024	0.8425	0.8411
CHEMBL3920	0.8404	0.837	0.8167	0.8337	0.8495	0.8467	0.8429	0.8591	0.8595
CHEMBL4068	0.7986	0.7859	0.7118	0.7949	0.8136	0.8141	0.8155	0.8173	0.821
CHEMBL4093	0.7681	0.7844	0.676	0.7686	0.8194	0.8213	0.7649	0.8153	0.8191
CHEMBL4508	0.8748	0.878	0.872	0.874	0.8781	0.8794	0.8764	0.874	0.8788
CHEMBL4681	0.7703	0.7788	0.7474	0.764	0.7964	0.8	0.7829	0.7991	0.8049
CHEMBL4683	0.8048	0.7922	0.6817	0.801	0.9148	0.9133	0.8247	0.9204	0.9245
CHEMBL4860	0.855	0.8511	0.8157	0.8515	0.8526	0.8492	0.8591	0.8579	0.8626
CHEMBL5366	0.8071	0.7903	0.7514	0.8045	0.9118	0.9133	0.8204	0.9086	0.9102
CHEMBL5979	0.7055	0.6925	0.6072	0.6982	0.8299	0.8311	0.6953	0.8448	0.8444
CHEMBL6135	0.8531	0.8455	0.6599	0.8429	0.8665	0.8691	0.8391	0.8798	0.8797
CHEMBL208	0.7932	0.789	0.7668	0.7908	0.8437	0.831	0.8056	0.8614	0.8628
CHEMBL209	0.81	0.8111	0.7979	0.8066	0.8796	0.8818	0.8237	0.8803	0.8758
CHEMBL252	0.8297	0.8157	0.7519	0.8089	0.8049	0.8103	0.8175	0.817	0.8137
CHEMBL1808	0.818	0.8106	0.7894	0.8157	0.8388	0.8365	0.8335	0.8467	0.8479
CHEMBL1809	0.8778	0.8679	0.7898	0.8736	0.8985	0.8957	0.8665	0.8862	0.8862
CHEMBL1853	0.7708	0.776	0.5993	0.7707	0.8249	0.8194	0.7867	0.8419	0.8369
CHEMBL1926	0.8362	0.8252	0.7628	0.824	0.8321	0.8346	0.8397	0.8428	0.8451
CHEMBL1955	0.7383	0.7202	0.6972	0.7403	0.7807	0.781	0.7237	0.761	0.7614
CHEMBL2051	0.7629	0.765	0.7336	0.748	0.7559	0.7521	0.7722	0.7692	0.765
CHEMBL2252	0.8276	0.8148	0.8099	0.812	0.8289	0.8252	0.8442	0.855	0.8557
CHEMBL2285	0.8124	0.8102	0.7874	0.8129	0.8279	0.8295	0.8109	0.8292	0.834
CHEMBL2508	0.7951	0.7914	0.7683	0.787	0.7946	0.7975	0.7718	0.7856	0.7905
CHEMBL2534	0.8585	0.8512	0.8324	0.8499	0.8572	0.8578	0.8681	0.8742	0.8737
CHEMBL3116	0.7553	0.7574	0.7152	0.74	0.7745	0.7717	0.7753	0.7911	0.7942
CHEMBL3710	0.7704	0.701	0.7368	0.7514	0.8029	0.8091	0.7945	0.8124	0.818
CHEMBL3776	0.4899	0.4454	0.5321	0.5315	0.8738	0.8756	0.5727	0.8754	0.8789
CHEMBL3922	0.8321	0.8197	0.8094	0.8213	0.8213	0.821	0.8306	0.8332	0.8327
CHEMBL3979	0.7857	0.7938	0.7972	0.8021	0.8859	0.8813	0.8383	0.8846	0.8891
CHEMBL4321	0.8404	0.8323	0.7452	0.8383	0.9004	0.9009	0.8565	0.9127	0.9135
CHEMBL4718	0.7982	0.7974	0.7255	0.8133	0.8742	0.8821	0.8008	0.8578	0.8503
CHEMBL4780	0.8249	0.8208	0.8036	0.8189	0.8235	0.8213	0.8284	0.8407	0.8403
CHEMBL4804	0.8095	0.7917	0.7634	0.7905	0.8081	0.8071	0.7953	0.8046	0.8069
CHEMBL5407	0.7875	0.78	0.7972	0.7769	0.7825	0.7791	0.806	0.8072	0.8083
CHEMBL6140	0.8665	0.8684	0.8608	0.8641	0.8655	0.8639	0.8685	0.8746	0.87
CHEMBL6154	0.7539	0.7563	0.7528	0.7541	0.7648	0.77	0.7905	0.7967	0.7965
CHEMBL1293244	0.77	0.7442	0.7311	0.7492	0.7854	0.7916	0.7858	0.7958	0.7908
CHEMBL1741186	0.7709	0.7608	0.7435	0.7554	0.7702	0.7756	0.7881	0.8002	0.8008
CHEMBL1795116	0.7921	0.7778	0.7737	0.7294	0.8382	0.8357	0.7529	0.8176	0.8238
CHEMBL222	0.7591	0.7508	0.7209	0.7478	0.766	0.7594	0.7527	0.7713	0.7729
CHEMBL236	0.8246	0.804	0.7556	0.8075	0.8613	0.8551	0.8208	0.8624	0.862
CHEMBL1947	0.9083	0.893	0.8809	0.8914	0.9039	0.9105	0.9076	0.9173	0.9192
CHEMBL1980	0.6806	0.7033	0.7247	0.7041	0.8375	0.8383	0.6886	0.8341	0.8339
CHEMBL1981	0.8386	0.8159	0.7908	0.8198	0.8726	0.8737	0.8326	0.8914	0.8896
CHEMBL1994	0.6973	0.657	0.6158	0.6907	0.7643	0.7668	0.7401	0.7855	0.7844
CHEMBL2127	0.7729	0.7735	0.7621	0.7715	0.7906	0.7873	0.7826	0.7876	0.7873
CHEMBL2292	0.7774	0.7659	0.7678	0.7725	0.8105	0.8087	0.79	0.8239	0.8247
CHEMBL2318	0.8258	0.8118	0.771	0.8219	0.8409	0.8476	0.8381	0.8567	0.8588
CHEMBL2335	0.8115	0.8059	0.769	0.8072	0.8166	0.8153	0.8132	0.818	0.8134
CHEMBL2527	0.8425	0.8274	0.8159	0.8383	0.8452	0.843	0.8402	0.8539	0.8551
CHEMBL2871	0.7471	0.7295	0.6086	0.7459	0.7647	0.7633	0.7561	0.7911	0.7889
CHEMBL3229	0.739	0.7205	0.7378	0.7271	0.7548	0.7595	0.7425	0.7704	0.7687
CHEMBL3238	0.6858	0.7035	0.612	0.7045	0.7817	0.7862	0.7257	0.7932	0.7867
CHEMBL3563	0.803	0.779	0.77	0.7984	0.808	0.8056	0.7935	0.834	0.834
CHEMBL3577	0.8064	0.8044	0.7699	0.8155	0.8069	0.8127	0.8183	0.8257	0.8328
CHEMBL3589	0.8135	0.8095	0.7856	0.8152	0.8641	0.862	0.8482	0.8771	0.8775
CHEMBL3629	0.8562	0.84	0.7707	0.8329	0.8658	0.8637	0.829	0.8829	0.8802
CHEMBL4026	0.7925	0.7939	0.7463	0.7865	0.7841	0.7926	0.8073	0.7901	0.7975
CHEMBL4036	0.7835	0.7196	0.6436	0.7405	0.837	0.8305	0.7642	0.8577	0.8639
CHEMBL4191	0.844	0.8315	0.8096	0.8242	0.8488	0.8416	0.8538	0.8713	0.8744
CHEMBL4393	0.8334	0.8288	0.8009	0.8222	0.8539	0.8535	0.8471	0.8724	0.8744
CHEMBL4581	0.8062	0.8038	0.7852	0.8026	0.806	0.8096	0.8283	0.8379	0.84
CHEMBL4618	0.7451	0.7276	0.6877	0.7014	0.731	0.735	0.7351	0.7678	0.7677
CHEMBL4803	0.7397	0.7271	0.7314	0.7223	0.7497	0.7404	0.7529	0.7629	0.7632
CHEMBL5077	0.8651	0.8721	0.835	0.8659	0.8829	0.8837	0.8676	0.88	0.8809
CHEMBL5314	0.7943	0.7961	0.749	0.7864	0.8013	0.802	0.7886	0.8276	0.8268
CHEMBL5462	0.8811	0.8811	0.8407	0.8734	0.8858	0.8889	0.8933	0.899	0.898
CHEMBL1075145	0.7374	0.6798	0.598	0.6768	0.7025	0.7192	0.7152	0.75	0.7576
CHEMBL1795177	0.7748	0.7647	0.7453	0.7742	0.7731	0.7672	0.7659	0.7658	0.767
CHEMBL3988596	0.8359	0.8463	0.8226	0.8427	0.8537	0.8543	0.8587	0.8639	0.8664
CHEMBL224	0.7705	0.7605	0.6805	0.7572	0.7837	0.7841	0.7471	0.8007	0.7931
CHEMBL227	0.8504	0.8521	0.7779	0.7898	0.8648	0.8668	0.8283	0.8657	0.8642
CHEMBL233	0.795	0.7755	0.713	0.7807	0.8255	0.8292	0.7818	0.8283	0.8252
CHEMBL1825	0.8067	0.793	0.7519	0.8027	0.8054	0.8096	0.8051	0.812	0.8061
CHEMBL1944	0.8127	0.8294	0.7659	0.8092	0.8529	0.8523	0.8417	0.8647	0.8642
CHEMBL1952	0.7968	0.793	0.7669	0.768	0.8102	0.8099	0.8239	0.8414	0.8426
CHEMBL1978	0.771	0.7608	0.7588	0.7662	0.7965	0.7953	0.7648	0.8078	0.8082
CHEMBL2041	0.7442	0.7374	0.7004	0.7272	0.7682	0.7762	0.7335	0.7883	0.7849
CHEMBL2108	0.8172	0.8076	0.7899	0.8121	0.8121	0.8191	0.7848	0.7848	0.7918
CHEMBL2243	0.8201	0.8126	0.8118	0.8137	0.8223	0.8272	0.8231	0.8496	0.8482
CHEMBL2334	0.861	0.8544	0.8299	0.8568	0.8687	0.8674	0.8514	0.8685	0.8666
CHEMBL2487	0.8333	0.8302	0.7776	0.841	0.8482	0.8493	0.8464	0.8524	0.8572
CHEMBL2525	0.8346	0.8287	0.8058	0.8201	0.8267	0.8212	0.8469	0.8469	0.8469
CHEMBL2652	0.855	0.8482	0.7976	0.8499	0.8643	0.8651	0.8626	0.8862	0.8834
CHEMBL2730	0.7947	0.7837	0.7692	0.7746	0.8064	0.8094	0.7774	0.8115	0.8095
CHEMBL2903	0.6721	0.6678	0.6829	0.6662	0.8028	0.8074	0.7647	0.8341	0.8345
CHEMBL3202	0.7716	0.7241	0.7238	0.7503	0.8159	0.813	0.7196	0.8246	0.8261
CHEMBL4550	0.8538	0.8502	0.7558	0.8451	0.8504	0.8458	0.8505	0.8546	0.856
CHEMBL4578	0.8392	0.863	0.8067	0.8519	0.8499	0.8511	0.8625	0.8632	0.8627
CHEMBL4625	0.8672	0.8506	0.8165	0.8491	0.8854	0.8856	0.8735	0.8955	0.896
CHEMBL4801	0.8678	0.8446	0.8208	0.8491	0.8834	0.8827	0.8613	0.8919	0.895
CHEMBL5103	0.8046	0.7737	0.7225	0.7884	0.8157	0.8118	0.7897	0.8274	0.8237
CHEMBL6032	0.78	0.7601	0.7466	0.766	0.7895	0.7943	0.7732	0.796	0.7981
CHEMBL1293257	0.7398	0.7209	0.6857	0.7224	0.7263	0.7296	0.7258	0.7398	0.7393
CHEMBL1293269	0.7943	0.7821	0.7569	0.7823	0.7839	0.7917	0.801	0.8046	0.8044
CHEMBL2189121	0.8757	0.8503	0.6788	0.853	0.8737	0.8786	0.8712	0.8971	0.8996

## Sheet: F1
Dataset	RF	XGB	CP	ΔCLOE	ΔCLAD	ΔCL	DΔCOE	DΔCAD	DΔC
CHEMBL4561	0.7384	0.749	0.6793	0.7288	0.741	0.7479	0.7218	0.7221	0.7233
CHEMBL202	0.811	0.8082	0.742	0.8008	0.846	0.8406	0.8027	0.8487	0.8506
CHEMBL217	0.7877	0.7742	0.7563	0.7903	0.8483	0.8513	0.7785	0.8431	0.8426
CHEMBL228	0.8164	0.8209	0.7978	0.8087	0.8365	0.8316	0.8176	0.8455	0.8463
CHEMBL1785	0.8574	0.8489	0.8101	0.8429	0.8561	0.8604	0.8784	0.8889	0.8931
CHEMBL1792	0.7274	0.7385	0.7801	0.7518	0.8696	0.8682	0.8026	0.881	0.883
CHEMBL1801	0.6987	0.6806	0.6286	0.7593	0.8236	0.8203	0.7873	0.8243	0.8297
CHEMBL1806	0.7238	0.7164	0.7648	0.7138	0.8412	0.8447	0.7981	0.8588	0.8514
CHEMBL1966	0.8093	0.7877	0.7895	0.7901	0.8526	0.8518	0.8197	0.8767	0.8756
CHEMBL2716	0.7425	0.746	0.6622	0.732	0.8443	0.8401	0.747	0.8214	0.8227
CHEMBL2850	0.7948	0.7809	0.7579	0.7824	0.8209	0.8204	0.8022	0.8324	0.8339
CHEMBL3024	0.8471	0.8366	0.8052	0.8384	0.8792	0.8771	0.8658	0.9004	0.8999
CHEMBL3234	0.7754	0.7573	0.7321	0.7659	0.7861	0.7846	0.7822	0.815	0.8101
CHEMBL3369	0.7484	0.7361	0.6777	0.7294	0.7473	0.7468	0.714	0.7307	0.7293
CHEMBL3568	0.8221	0.8242	0.8131	0.8189	0.8153	0.8125	0.8167	0.8308	0.8274
CHEMBL3582	0.7731	0.7847	0.6312	0.7597	0.7658	0.7749	0.7827	0.7982	0.8029
CHEMBL3807	0.8545	0.8331	0.7851	0.8384	0.888	0.8823	0.8575	0.8927	0.8915
CHEMBL4204	0.8619	0.8563	0.8376	0.8498	0.8526	0.8593	0.8394	0.8497	0.8574
CHEMBL4372	0.7625	0.7587	0.6258	0.7833	0.8347	0.8418	0.7625	0.8202	0.8219
CHEMBL4588	0.8464	0.8396	0.8175	0.829	0.8457	0.8446	0.866	0.8771	0.8784
CHEMBL5080	0.8626	0.8421	0.8407	0.8496	0.8641	0.8663	0.8307	0.8539	0.8555
CHEMBL5285	0.8531	0.8345	0.7947	0.8411	0.8562	0.8616	0.8426	0.8662	0.8699
CHEMBL5331	0.7943	0.7675	0.7279	0.7662	0.7889	0.7887	0.7707	0.7807	0.7763
CHEMBL5469	0.6258	0.6181	0.7458	0.5466	0.8667	0.8765	0.7366	0.8833	0.8865
CHEMBL5697	0.8422	0.8308	0.7984	0.833	0.8491	0.8518	0.8387	0.8645	0.8596
CHEMBL1250348	0.7897	0.7174	0.7422	0.6498	0.8513	0.8561	0.7088	0.8816	0.8803
CHEMBL1293311	0.6208	0.6255	0.5476	0.5858	0.587	0.5883	0.6242	0.6075	0.6229
CHEMBL1795186	0.6819	0.6855	0.7096	0.7078	0.6991	0.6959	0.7971	0.804	0.8054
CHEMBL2189110	0.7825	0.773	0.708	0.7673	0.7623	0.7643	0.7773	0.8016	0.7989
CHEMBL2216739	0.8398	0.8123	0.8224	0.8288	0.8302	0.8215	0.7874	0.8219	0.8165
CHEMBL3988599	0.7956	0.7565	0.7541	0.7619	0.7613	0.7745	0.7699	0.7705	0.7781
CHEMBL205	0.8582	0.8486	0.7961	0.8533	0.8629	0.8647	0.8748	0.8877	0.8871
CHEMBL238	0.8249	0.8185	0.817	0.812	0.8374	0.8408	0.8419	0.8617	0.8594
CHEMBL239	0.7301	0.7223	0.7229	0.7118	0.796	0.7953	0.7375	0.7995	0.8026
CHEMBL288	0.8411	0.8387	0.7806	0.8391	0.8538	0.8576	0.8356	0.8637	0.8611
CHEMBL1781	0.7824	0.7879	0.769	0.7681	0.8396	0.8409	0.8169	0.8478	0.8552
CHEMBL1917	0.7535	0.7586	0.6766	0.7631	0.8116	0.8173	0.7838	0.8485	0.84
CHEMBL2007	0.7618	0.7457	0.7212	0.7573	0.8023	0.802	0.7422	0.8082	0.8073
CHEMBL2563	0.7491	0.7214	0.615	0.7323	0.8413	0.8306	0.7073	0.8353	0.8339
CHEMBL3286	0.7819	0.7782	0.7592	0.7966	0.8419	0.8341	0.7942	0.8504	0.8535
CHEMBL3587	0.8155	0.796	0.7664	0.7946	0.8437	0.8406	0.7904	0.8501	0.8485
CHEMBL3721	0.5903	0.5519	0.5946	0.5816	0.7293	0.7334	0.6326	0.7725	0.7753
CHEMBL3746	0.6462	0.6133	0.51	0.6231	0.6952	0.69	0.5953	0.7803	0.7806
CHEMBL4015	0.8011	0.7837	0.7852	0.785	0.8051	0.8029	0.8044	0.8084	0.8116
CHEMBL4072	0.7848	0.7535	0.7545	0.767	0.8374	0.8425	0.8042	0.85	0.852
CHEMBL4161	0.8273	0.8234	0.7563	0.8119	0.8119	0.8117	0.8069	0.8069	0.8058
CHEMBL4439	0.8261	0.8142	0.7633	0.8196	0.8352	0.8383	0.818	0.8385	0.8373
CHEMBL4462	0.7796	0.7722	0.7187	0.7628	0.7935	0.7977	0.7844	0.8079	0.8062
CHEMBL4599	0.7571	0.7389	0.6874	0.7464	0.8102	0.8131	0.748	0.8204	0.8256
CHEMBL4766	0.7863	0.7567	0.7201	0.706	0.7966	0.8398	0.7297	0.8171	0.8484
CHEMBL4835	0.861	0.8505	0.8191	0.835	0.8738	0.8744	0.8818	0.8975	0.8965
CHEMBL5491	0.8653	0.848	0.7614	0.8622	0.8698	0.877	0.8632	0.8817	0.8836
CHEMBL5543	0.71	0.726	0.6163	0.72	0.7488	0.7442	0.7413	0.7552	0.7531
CHEMBL5620	0.8234	0.8204	0.8004	0.8207	0.8475	0.8483	0.8216	0.8448	0.8458
CHEMBL6164	0.7454	0.7386	0.7282	0.7461	0.7458	0.7505	0.7794	0.7872	0.7862
CHEMBL1163101	0.6895	0.672	0.4341	0.6057	0.9288	0.9187	0.632	0.906	0.9028
CHEMBL1293289	0.7443	0.7334	0.7572	0.756	0.7426	0.7463	0.8156	0.8187	0.8212
CHEMBL2169736	0.7416	0.7202	0.69	0.7276	0.804	0.7992	0.7397	0.8099	0.8041
CHEMBL3638344	0.8676	0.8608	0.8764	0.8606	0.8649	0.8662	0.9072	0.9098	0.909
CHEMBL4296013	0.817	0.8194	0.7048	0.7955	0.8451	0.8478	0.8024	0.8637	0.8598
CHEMBL249	0.7705	0.7572	0.7093	0.7653	0.7798	0.7796	0.7779	0.7818	0.7761
CHEMBL261	0.8204	0.797	0.8005	0.8058	0.8712	0.8739	0.8212	0.8867	0.8811
CHEMBL274	0.8026	0.7961	0.7581	0.7983	0.8051	0.8048	0.8086	0.8162	0.8199
CHEMBL338	0.8313	0.8081	0.7944	0.8098	0.814	0.8124	0.8279	0.8328	0.8363
CHEMBL1871	0.7989	0.7818	0.7594	0.7858	0.8469	0.8511	0.804	0.8538	0.8528
CHEMBL1900	0.8034	0.8015	0.7507	0.7979	0.8338	0.8331	0.7919	0.8218	0.8169
CHEMBL1929	0.8023	0.7933	0.7892	0.7994	0.8702	0.8686	0.8042	0.8848	0.8791
CHEMBL2028	0.7236	0.7383	0.6497	0.7363	0.742	0.737	0.732	0.7776	0.7835
CHEMBL2207	0.7564	0.7396	0.7318	0.7331	0.7373	0.7425	0.7668	0.7735	0.7768
CHEMBL2439	0.7904	0.7829	0.723	0.7819	0.8231	0.8179	0.7562	0.8137	0.8173
CHEMBL2808	0.8132	0.8157	0.6929	0.8043	0.839	0.8403	0.7743	0.8398	0.8378
CHEMBL2820	0.8747	0.8526	0.8121	0.8598	0.8663	0.8675	0.8678	0.879	0.8823
CHEMBL2993	0.841	0.841	0.7953	0.838	0.8389	0.8397	0.8445	0.8496	0.8562
CHEMBL3045	0.7638	0.7441	0.7219	0.7561	0.8327	0.8323	0.7694	0.8393	0.84
CHEMBL3332	0.8127	0.7809	0.7517	0.7832	0.8139	0.8151	0.7706	0.7814	0.782
CHEMBL3468	0.817	0.8113	0.7709	0.8057	0.8314	0.8379	0.8048	0.8308	0.8322
CHEMBL3535	0.6917	0.7351	0.6081	0.6786	0.8633	0.8674	0.6923	0.8721	0.8708
CHEMBL3864	0.8308	0.8281	0.7303	0.8299	0.8882	0.888	0.8249	0.8953	0.8974
CHEMBL3910	0.7829	0.7774	0.7605	0.7745	0.7857	0.7824	0.7834	0.7953	0.7948
CHEMBL4073	0.7933	0.7528	0.7501	0.7827	0.8264	0.8258	0.7871	0.8378	0.8364
CHEMBL4074	0.8215	0.8182	0.8019	0.8222	0.8213	0.8248	0.827	0.8328	0.8329
CHEMBL4128	0.7905	0.7825	0.751	0.7772	0.7976	0.8048	0.8069	0.8295	0.8289
CHEMBL4662	0.822	0.8238	0.797	0.8189	0.8343	0.8375	0.8373	0.8486	0.8473
CHEMBL5147	0.7621	0.7524	0.7035	0.7566	0.7581	0.7636	0.754	0.7608	0.7602
CHEMBL5192	0.783	0.758	0.7658	0.7399	0.7874	0.7898	0.7795	0.8266	0.8311
CHEMBL5408	0.7822	0.7723	0.6933	0.7521	0.8647	0.8688	0.6563	0.8758	0.8793
CHEMBL6115	0.8509	0.8469	0.8271	0.8489	0.8611	0.8598	0.8697	0.887	0.8855
CHEMBL298	0.8274	0.7954	0.7467	0.8128	0.8208	0.8239	0.7933	0.8193	0.8238
CHEMBL299	0.8175	0.8088	0.8127	0.8192	0.8982	0.8972	0.8519	0.9031	0.9051
CHEMBL339	0.76	0.7195	0.6767	0.6947	0.8193	0.8133	0.7543	0.8225	0.8201
CHEMBL1856	0.8857	0.8845	0.8276	0.8797	0.8946	0.8945	0.8674	0.8804	0.8817
CHEMBL2002	0.8028	0.7921	0.6568	0.7684	0.8304	0.8326	0.739	0.8326	0.8356
CHEMBL2996	0.8155	0.818	0.7963	0.8108	0.8279	0.8259	0.8166	0.8303	0.831
CHEMBL2998	0.8211	0.8369	0.8115	0.8213	0.8261	0.8228	0.8634	0.8628	0.8644
CHEMBL3066	0.8601	0.8563	0.8119	0.8458	0.8609	0.8586	0.8521	0.8664	0.8641
CHEMBL3081	0.8268	0.8376	0.8303	0.8219	0.8295	0.839	0.8337	0.855	0.8594
CHEMBL3476	0.7961	0.7805	0.7261	0.7792	0.8192	0.8122	0.7935	0.836	0.8348
CHEMBL3524	0.7819	0.7549	0.7436	0.772	0.8677	0.8682	0.8021	0.8711	0.8725
CHEMBL3691	0.8046	0.8011	0.7875	0.7932	0.7996	0.7999	0.8172	0.816	0.8191
CHEMBL3891	0.7768	0.7747	0.7312	0.7786	0.789	0.786	0.7734	0.7816	0.7843
CHEMBL4102	0.7521	0.7322	0.7209	0.7339	0.7763	0.7783	0.7471	0.8126	0.8066
CHEMBL4117	0.6965	0.6682	0.6351	0.675	0.6726	0.6707	0.6822	0.6868	0.6875
CHEMBL4303	0.8709	0.8532	0.8348	0.8611	0.8715	0.8775	0.8557	0.8678	0.8673
CHEMBL4481	0.7644	0.7604	0.7335	0.7544	0.7456	0.7497	0.7728	0.7789	0.7782
CHEMBL4506	0.8433	0.8386	0.7879	0.8387	0.8624	0.8536	0.8377	0.8693	0.8704
CHEMBL4696	0.718	0.7006	0.672	0.7051	0.7203	0.7199	0.705	0.7023	0.7134
CHEMBL4895	0.8365	0.8192	0.802	0.8277	0.8355	0.8343	0.8328	0.8532	0.854
CHEMBL4937	0.8305	0.8431	0.7911	0.8318	0.8408	0.8388	0.8359	0.8471	0.8435
CHEMBL5747	0.8446	0.8391	0.7891	0.8396	0.8501	0.8533	0.836	0.8645	0.8599
CHEMBL6136	0.7582	0.7351	0.7259	0.7373	0.8644	0.8693	0.737	0.8589	0.8612
CHEMBL1075138	0.7339	0.7245	0.6876	0.7104	0.854	0.8491	0.7015	0.8653	0.8654
CHEMBL1921666	0.836	0.8266	0.8251	0.8383	0.8975	0.8992	0.8244	0.8843	0.8841
CHEMBL2146302	0.8681	0.8606	0.8525	0.8596	0.872	0.8724	0.8703	0.8922	0.8907
CHEMBL2331053	0.6347	0.6529	0.5887	0.5648	0.7293	0.7273	0.5319	0.7063	0.7179
CHEMBL2366517	0.8035	0.8099	0.7616	0.8113	0.8223	0.8234	0.8172	0.8505	0.8502
CHEMBL4523582	0.7999	0.8009	0.7577	0.7915	0.8457	0.8462	0.8034	0.8437	0.8439
CHEMBL241	0.7358	0.6672	0.6547	0.6964	0.7925	0.7921	0.6888	0.7951	0.7999
CHEMBL254	0.8371	0.8378	0.8124	0.8381	0.8415	0.8478	0.8329	0.8522	0.8578
CHEMBL1855	0.88	0.8717	0.8304	0.8701	0.8726	0.8753	0.8654	0.8788	0.8771
CHEMBL1868	0.7559	0.7474	0.7215	0.746	0.8095	0.8067	0.7626	0.8332	0.8319
CHEMBL2179	0.6787	0.645	0.6263	0.6496	0.7235	0.7275	0.7437	0.8396	0.8378
CHEMBL2345	0.8244	0.819	0.7779	0.8211	0.8324	0.8334	0.8538	0.8586	0.856
CHEMBL2425	0.8513	0.8413	0.779	0.8413	0.8489	0.8533	0.8314	0.8402	0.8414
CHEMBL2431	0.8245	0.8101	0.7886	0.8188	0.8428	0.8375	0.8149	0.8399	0.8452
CHEMBL2593	0.8516	0.8501	0.8048	0.8384	0.8476	0.8496	0.858	0.8685	0.873
CHEMBL2622	0.8172	0.8103	0.7809	0.8052	0.8215	0.8189	0.8195	0.8381	0.8396
CHEMBL2635	0.7341	0.7238	0.6987	0.7352	0.7749	0.7716	0.7589	0.8235	0.8346
CHEMBL2828	0.8613	0.8642	0.8606	0.8578	0.8949	0.8929	0.8696	0.9012	0.9039
CHEMBL2959	0.7979	0.7926	0.7626	0.786	0.8309	0.8319	0.788	0.8441	0.8463
CHEMBL3474	0.7805	0.7723	0.7622	0.7664	0.8083	0.8009	0.7961	0.8208	0.8227
CHEMBL3475	0.7645	0.7432	0.7134	0.7396	0.7493	0.7575	0.7673	0.7704	0.7795
CHEMBL3514	0.8803	0.8743	0.8551	0.8828	0.8856	0.8846	0.8803	0.8879	0.8885
CHEMBL3529	0.8146	0.7995	0.7514	0.8172	0.9101	0.9109	0.7141	0.9233	0.9226
CHEMBL3855	0.8515	0.8489	0.826	0.8434	0.8459	0.8478	0.8515	0.8503	0.8511
CHEMBL3869	0.8015	0.8052	0.7883	0.8036	0.8339	0.8375	0.8019	0.8421	0.8405
CHEMBL3920	0.8404	0.837	0.8167	0.8331	0.8492	0.8464	0.8426	0.859	0.8591
CHEMBL4068	0.7985	0.7859	0.7118	0.7932	0.8119	0.8136	0.8146	0.8164	0.8206
CHEMBL4093	0.7681	0.7843	0.676	0.7666	0.8178	0.8221	0.7642	0.816	0.8197
CHEMBL4508	0.8748	0.8779	0.872	0.8743	0.8781	0.88	0.8762	0.8735	0.8795
CHEMBL4681	0.7703	0.7788	0.7474	0.7623	0.7961	0.8	0.7838	0.8014	0.805
CHEMBL4683	0.8048	0.7922	0.6817	0.8	0.9147	0.9133	0.8254	0.9204	0.9244
CHEMBL4860	0.855	0.851	0.8157	0.8514	0.8525	0.8492	0.8599	0.8586	0.8626
CHEMBL5366	0.807	0.7901	0.7514	0.8021	0.9114	0.9131	0.8195	0.9091	0.9102
CHEMBL5979	0.7055	0.6925	0.6072	0.6973	0.8306	0.8309	0.6955	0.8452	0.8453
CHEMBL6135	0.8531	0.8454	0.6599	0.8423	0.866	0.869	0.8395	0.8802	0.8801
CHEMBL208	0.7932	0.7889	0.7668	0.79	0.8444	0.8314	0.8042	0.8613	0.8634
CHEMBL209	0.81	0.8111	0.7979	0.8069	0.8793	0.8821	0.8224	0.8797	0.876
CHEMBL252	0.8297	0.8157	0.7519	0.8083	0.8041	0.8108	0.8188	0.8174	0.8145
CHEMBL1808	0.8179	0.8105	0.7894	0.8155	0.8382	0.8374	0.8326	0.8461	0.8479
CHEMBL1809	0.8778	0.8679	0.7898	0.8723	0.8978	0.8959	0.8646	0.8858	0.8853
CHEMBL1853	0.7704	0.7757	0.5993	0.7676	0.8225	0.8203	0.788	0.8402	0.8364
CHEMBL1926	0.8362	0.8252	0.7628	0.823	0.8315	0.8354	0.8402	0.842	0.8461
CHEMBL1955	0.7383	0.7202	0.6972	0.7382	0.7812	0.7813	0.7261	0.7609	0.7608
CHEMBL2051	0.7628	0.7649	0.7336	0.7481	0.7559	0.7528	0.7732	0.768	0.7618
CHEMBL2252	0.8276	0.8148	0.8099	0.8111	0.8277	0.8254	0.8435	0.8542	0.8553
CHEMBL2285	0.8124	0.8102	0.7874	0.8115	0.8281	0.8286	0.811	0.8295	0.8342
CHEMBL2508	0.7951	0.7914	0.7683	0.7873	0.7938	0.7981	0.7671	0.7831	0.7916
CHEMBL2534	0.8585	0.8512	0.8324	0.8495	0.8562	0.8573	0.8674	0.8742	0.8735
CHEMBL3116	0.7552	0.7574	0.7152	0.7378	0.7735	0.7711	0.7749	0.7901	0.7945
CHEMBL3710	0.7704	0.701	0.7368	0.7474	0.8022	0.8105	0.7914	0.8158	0.8159
CHEMBL3776	0.4899	0.4454	0.5321	0.5199	0.8732	0.8754	0.556	0.8756	0.8786
CHEMBL3922	0.8321	0.8197	0.8094	0.8209	0.8203	0.8213	0.831	0.833	0.8335
CHEMBL3979	0.7857	0.7937	0.7972	0.8007	0.8848	0.8817	0.836	0.8838	0.8887
CHEMBL4321	0.8404	0.8322	0.7452	0.8369	0.9002	0.9011	0.8572	0.9123	0.913
CHEMBL4718	0.7982	0.7974	0.7255	0.813	0.873	0.882	0.8	0.858	0.851
CHEMBL4780	0.8249	0.8208	0.8036	0.8176	0.8223	0.821	0.8287	0.8409	0.841
CHEMBL4804	0.8095	0.7917	0.7634	0.7881	0.808	0.8062	0.7943	0.8035	0.807
CHEMBL5407	0.7874	0.7799	0.7972	0.7754	0.7812	0.7777	0.8055	0.806	0.8083
CHEMBL6140	0.8664	0.8684	0.8608	0.8638	0.8651	0.8635	0.8686	0.8749	0.8699
CHEMBL6154	0.7539	0.7563	0.7528	0.7535	0.764	0.772	0.7914	0.7976	0.7957
CHEMBL1293244	0.7698	0.7438	0.7311	0.746	0.7827	0.7928	0.7878	0.7949	0.793
CHEMBL1741186	0.7709	0.7608	0.7435	0.7558	0.7696	0.7755	0.7882	0.7995	0.8018
CHEMBL1795116	0.792	0.7778	0.7737	0.6981	0.8333	0.8339	0.7343	0.8107	0.824
CHEMBL222	0.759	0.7507	0.7209	0.7487	0.7657	0.7591	0.7519	0.7665	0.7716
CHEMBL236	0.8246	0.804	0.7556	0.8065	0.8604	0.8553	0.8211	0.8631	0.8627
CHEMBL1947	0.9083	0.8929	0.8809	0.8911	0.9039	0.9104	0.9078	0.9182	0.9196
CHEMBL1980	0.6806	0.7033	0.7247	0.7021	0.8382	0.8392	0.6901	0.8355	0.8333
CHEMBL1981	0.8386	0.8159	0.7908	0.8195	0.8729	0.8734	0.8315	0.8916	0.8899
CHEMBL1994	0.6973	0.6569	0.6158	0.6901	0.764	0.7668	0.7434	0.7845	0.7837
CHEMBL2127	0.7728	0.7735	0.7621	0.7691	0.7919	0.7878	0.7823	0.7863	0.7877
CHEMBL2292	0.7774	0.7658	0.7678	0.7726	0.8109	0.8099	0.7892	0.8239	0.8235
CHEMBL2318	0.8258	0.8117	0.771	0.8205	0.8401	0.8488	0.8367	0.8572	0.8603
CHEMBL2335	0.8115	0.8059	0.769	0.8049	0.8162	0.8147	0.8156	0.8161	0.812
CHEMBL2527	0.8425	0.8274	0.8159	0.8373	0.8445	0.8416	0.8391	0.8542	0.8555
CHEMBL2871	0.747	0.7294	0.6086	0.7451	0.764	0.764	0.7563	0.7895	0.7881
CHEMBL3229	0.739	0.7205	0.7378	0.7276	0.7545	0.7608	0.7408	0.7705	0.7686
CHEMBL3238	0.6857	0.7035	0.612	0.7013	0.7813	0.7871	0.7224	0.7933	0.7866
CHEMBL3563	0.8029	0.779	0.77	0.7983	0.807	0.8045	0.7936	0.8332	0.8341
CHEMBL3577	0.8064	0.8043	0.7699	0.8153	0.8061	0.8118	0.8187	0.8244	0.8307
CHEMBL3589	0.8135	0.8095	0.7856	0.8139	0.8631	0.8623	0.8472	0.8772	0.8775
CHEMBL3629	0.8562	0.8399	0.7707	0.8325	0.8654	0.8636	0.8269	0.8823	0.8802
CHEMBL4026	0.7924	0.7938	0.7463	0.7857	0.7834	0.7932	0.8088	0.7895	0.7984
CHEMBL4036	0.7834	0.7196	0.6436	0.7384	0.8363	0.8303	0.7624	0.8562	0.8637
CHEMBL4191	0.844	0.8315	0.8096	0.8232	0.8487	0.8423	0.8535	0.8715	0.8743
CHEMBL4393	0.8334	0.8288	0.8009	0.8217	0.8532	0.854	0.8466	0.8728	0.874
CHEMBL4581	0.8062	0.8038	0.7852	0.8022	0.8051	0.8092	0.8274	0.8374	0.84
CHEMBL4618	0.7451	0.7275	0.6877	0.702	0.7298	0.7343	0.7359	0.7673	0.7698
CHEMBL4803	0.7397	0.7271	0.7314	0.7203	0.7498	0.7393	0.7539	0.7628	0.7644
CHEMBL5077	0.865	0.872	0.835	0.8648	0.8823	0.8838	0.8673	0.8794	0.8809
CHEMBL5314	0.7942	0.796	0.749	0.7854	0.7999	0.8008	0.7857	0.8283	0.8276
CHEMBL5462	0.881	0.8811	0.8407	0.8724	0.8843	0.8885	0.8934	0.8984	0.8982
CHEMBL1075145	0.7374	0.6798	0.598	0.6731	0.7056	0.722	0.7125	0.7471	0.7581
CHEMBL1795177	0.7748	0.7647	0.7453	0.7734	0.7723	0.7667	0.762	0.7635	0.764
CHEMBL3988596	0.8359	0.8463	0.8226	0.8413	0.852	0.8544	0.8583	0.8636	0.8664
CHEMBL224	0.7705	0.7604	0.6805	0.7545	0.783	0.7819	0.7448	0.8005	0.794
CHEMBL227	0.8504	0.8521	0.7779	0.7873	0.864	0.8673	0.8263	0.8648	0.8637
CHEMBL233	0.7949	0.7753	0.713	0.7803	0.8263	0.8301	0.777	0.8271	0.8264
CHEMBL1825	0.8067	0.793	0.7519	0.8018	0.8045	0.8105	0.8047	0.8111	0.8041
CHEMBL1944	0.8127	0.8293	0.7659	0.8088	0.8525	0.852	0.8412	0.8643	0.8642
CHEMBL1952	0.7968	0.793	0.7669	0.7663	0.8088	0.8093	0.824	0.8418	0.842
CHEMBL1978	0.771	0.7607	0.7588	0.7655	0.7964	0.7945	0.7641	0.8082	0.8078
CHEMBL2041	0.7442	0.7374	0.7004	0.726	0.7691	0.7762	0.7344	0.7892	0.787
CHEMBL2108	0.8172	0.8076	0.7899	0.809	0.809	0.8177	0.7829	0.7829	0.7934
CHEMBL2243	0.8201	0.8126	0.8118	0.8136	0.8219	0.8266	0.8223	0.8496	0.8492
CHEMBL2334	0.861	0.8544	0.8299	0.8567	0.8684	0.8677	0.8513	0.8688	0.867
CHEMBL2487	0.8333	0.8302	0.7776	0.8406	0.8479	0.849	0.8463	0.8521	0.8567
CHEMBL2525	0.8345	0.8287	0.8058	0.8189	0.8265	0.8218	0.847	0.8467	0.8464
CHEMBL2652	0.855	0.8482	0.7976	0.8498	0.8645	0.8651	0.8634	0.8862	0.8832
CHEMBL2730	0.7947	0.7837	0.7692	0.7736	0.8061	0.8091	0.7777	0.8104	0.8074
CHEMBL2903	0.6721	0.6677	0.6829	0.6588	0.8018	0.8084	0.7618	0.8338	0.8363
CHEMBL3202	0.7715	0.724	0.7238	0.7515	0.8148	0.8128	0.7173	0.8251	0.8264
CHEMBL4550	0.8538	0.8502	0.7558	0.8441	0.8495	0.8459	0.8494	0.8545	0.8561
CHEMBL4578	0.8392	0.863	0.8067	0.8517	0.8497	0.8517	0.8626	0.8632	0.8627
CHEMBL4625	0.8672	0.8506	0.8165	0.8473	0.8851	0.8861	0.8726	0.8954	0.896
CHEMBL4801	0.8678	0.8446	0.8208	0.8485	0.883	0.8829	0.8607	0.8919	0.8948
CHEMBL5103	0.8046	0.7736	0.7225	0.7886	0.8149	0.8119	0.788	0.8271	0.8248
CHEMBL6032	0.78	0.7601	0.7466	0.765	0.7907	0.7935	0.7714	0.799	0.7969
CHEMBL1293257	0.7398	0.7209	0.6857	0.7146	0.7189	0.7316	0.7216	0.7347	0.7396
CHEMBL1293269	0.7943	0.7821	0.7569	0.7813	0.7822	0.7911	0.8014	0.8048	0.8046
CHEMBL2189121	0.8757	0.8502	0.6788	0.8528	0.8726	0.8789	0.8715	0.8975	0.8996

## Sheet: AUC
Dataset	RF	XGB	CP	ΔCLOE	ΔCLAD	ΔCL	DΔCOE	DΔCAD	DΔC
CHEMBL4561	0.8152	0.8239	0.7434	0.8052	0.8236	0.8228	0.7947	0.7998	0.8066
CHEMBL202	0.8924	0.8873	0.8102	0.8889	0.9266	0.92	0.8826	0.9241	0.9216
CHEMBL217	0.877	0.8565	0.8296	0.8695	0.9228	0.9227	0.8557	0.916	0.9145
CHEMBL228	0.8994	0.8982	0.8799	0.8942	0.9171	0.9131	0.8994	0.924	0.9219
CHEMBL1785	0.9336	0.9263	0.8947	0.9277	0.937	0.9375	0.9529	0.9587	0.9614
CHEMBL1792	0.8386	0.838	0.8722	0.8452	0.9458	0.9449	0.8916	0.9558	0.9561
CHEMBL1801	0.7671	0.6984	0.7041	0.8429	0.9054	0.9006	0.8659	0.9046	0.9074
CHEMBL1806	0.7954	0.7777	0.8371	0.781	0.919	0.9174	0.8762	0.9319	0.9261
CHEMBL1966	0.8949	0.8731	0.8715	0.8769	0.9317	0.9322	0.9009	0.9448	0.9402
CHEMBL2716	0.8219	0.8176	0.7271	0.8052	0.9211	0.9168	0.8187	0.9118	0.908
CHEMBL2850	0.8745	0.8587	0.8353	0.8602	0.8917	0.8966	0.8831	0.9126	0.9122
CHEMBL3024	0.9313	0.9181	0.8899	0.9194	0.9506	0.9496	0.9398	0.9628	0.961
CHEMBL3234	0.8582	0.8386	0.8058	0.8442	0.8634	0.8643	0.8562	0.8951	0.8897
CHEMBL3369	0.8184	0.8	0.7474	0.8008	0.8266	0.8288	0.7881	0.8014	0.8057
CHEMBL3568	0.9082	0.9078	0.8927	0.9037	0.9024	0.9005	0.8988	0.909	0.9044
CHEMBL3582	0.8562	0.8669	0.6675	0.8507	0.8543	0.8577	0.853	0.8787	0.8811
CHEMBL3807	0.9353	0.9078	0.8748	0.918	0.9543	0.9515	0.9361	0.9606	0.9579
CHEMBL4204	0.9347	0.9286	0.9181	0.9315	0.9342	0.9329	0.915	0.9217	0.9226
CHEMBL4372	0.8486	0.8327	0.6924	0.8613	0.9155	0.9152	0.8334	0.8997	0.8969
CHEMBL4588	0.9212	0.9135	0.9	0.9079	0.9216	0.919	0.9329	0.9423	0.9419
CHEMBL5080	0.9415	0.9214	0.9263	0.9277	0.9421	0.9438	0.9187	0.9367	0.9356
CHEMBL5285	0.9296	0.9175	0.8725	0.9198	0.9334	0.9322	0.9252	0.94	0.9412
CHEMBL5331	0.869	0.8499	0.8083	0.8496	0.8765	0.8691	0.843	0.852	0.8479
CHEMBL5469	0.6481	0.6491	0.8033	0.591	0.9527	0.9565	0.8122	0.9589	0.958
CHEMBL5697	0.9108	0.9001	0.8673	0.9094	0.9234	0.9234	0.9146	0.9332	0.928
CHEMBL1250348	0.8799	0.7851	0.8272	0.7648	0.9245	0.9248	0.8103	0.938	0.9371
CHEMBL1293311	0.6805	0.6871	0.5918	0.6262	0.6324	0.6332	0.6768	0.6647	0.6783
CHEMBL1795186	0.7366	0.7361	0.7957	0.7656	0.7504	0.7392	0.8677	0.8709	0.8806
CHEMBL2189110	0.8719	0.8567	0.7825	0.8476	0.8418	0.85	0.8627	0.8852	0.8824
CHEMBL2216739	0.9222	0.8941	0.8992	0.9019	0.9071	0.902	0.8597	0.8915	0.8878
CHEMBL3988599	0.8781	0.8364	0.8386	0.8379	0.8387	0.8457	0.8527	0.8487	0.8513
CHEMBL205	0.9209	0.8984	0.8735	0.9292	0.9334	0.9365	0.9441	0.9512	0.9492
CHEMBL238	0.9086	0.8962	0.8957	0.8958	0.9162	0.9181	0.9221	0.9388	0.9363
CHEMBL239	0.8046	0.7939	0.7942	0.7797	0.8765	0.8774	0.809	0.8784	0.8778
CHEMBL288	0.926	0.9216	0.8638	0.9203	0.9304	0.9326	0.917	0.9373	0.9349
CHEMBL1781	0.8691	0.8735	0.8551	0.8546	0.9197	0.9184	0.8932	0.9305	0.9341
CHEMBL1917	0.8175	0.823	0.7469	0.84	0.8927	0.8947	0.8627	0.9197	0.9123
CHEMBL2007	0.847	0.8296	0.7914	0.8408	0.8858	0.8854	0.8177	0.8858	0.8844
CHEMBL2563	0.8196	0.7883	0.6725	0.82	0.9146	0.9083	0.7831	0.9034	0.9035
CHEMBL3286	0.8679	0.8657	0.8334	0.8751	0.9189	0.9129	0.8818	0.9311	0.932
CHEMBL3587	0.8941	0.8646	0.8403	0.8733	0.9237	0.9199	0.8706	0.9231	0.9231
CHEMBL3721	0.6533	0.5983	0.6259	0.6168	0.8047	0.808	0.6902	0.851	0.8502
CHEMBL3746	0.6936	0.6448	0.5258	0.6749	0.7647	0.7768	0.6572	0.8579	0.8553
CHEMBL4015	0.8843	0.8631	0.8679	0.8664	0.8871	0.8835	0.8803	0.8881	0.8861
CHEMBL4072	0.8689	0.8336	0.8374	0.8561	0.9212	0.9236	0.8862	0.9266	0.9255
CHEMBL4161	0.9026	0.8955	0.8421	0.8917	0.8917	0.8898	0.893	0.893	0.8901
CHEMBL4439	0.9078	0.8961	0.8479	0.904	0.9165	0.919	0.9014	0.9208	0.9191
CHEMBL4462	0.8632	0.8498	0.7908	0.8427	0.8732	0.8758	0.8584	0.885	0.8799
CHEMBL4599	0.8244	0.805	0.7681	0.8174	0.8928	0.8927	0.8262	0.8903	0.8949
CHEMBL4766	0.8671	0.8338	0.791	0.8315	0.9101	0.9165	0.8444	0.9149	0.9188
CHEMBL4835	0.9346	0.9351	0.9129	0.9198	0.9458	0.9469	0.9569	0.9676	0.9667
CHEMBL5491	0.944	0.9276	0.856	0.9425	0.9472	0.9501	0.9442	0.9504	0.9539
CHEMBL5543	0.7869	0.7838	0.6578	0.7977	0.8354	0.822	0.8185	0.8385	0.8411
CHEMBL5620	0.9117	0.9075	0.8928	0.9069	0.9276	0.9296	0.9052	0.9292	0.9301
CHEMBL6164	0.8251	0.8227	0.8046	0.8213	0.8238	0.8291	0.8583	0.8662	0.8632
CHEMBL1163101	0.791	0.7347	0.4336	0.6726	0.9673	0.9682	0.6818	0.9632	0.9645
CHEMBL1293289	0.8224	0.8119	0.8365	0.8201	0.8061	0.8048	0.8888	0.8922	0.8949
CHEMBL2169736	0.8282	0.8086	0.7669	0.8081	0.8847	0.8815	0.8199	0.8845	0.8781
CHEMBL3638344	0.9556	0.9495	0.9584	0.9474	0.9481	0.9456	0.9716	0.9741	0.9709
CHEMBL4296013	0.8935	0.896	0.7793	0.882	0.9226	0.9239	0.8856	0.9331	0.9312
CHEMBL249	0.8492	0.835	0.787	0.85	0.863	0.8619	0.8555	0.8645	0.8603
CHEMBL261	0.9084	0.8911	0.8919	0.8914	0.9419	0.9417	0.911	0.9561	0.9533
CHEMBL274	0.8883	0.8777	0.8476	0.8839	0.8916	0.8914	0.8883	0.896	0.8957
CHEMBL338	0.9115	0.8927	0.8807	0.8969	0.8979	0.8963	0.9091	0.9113	0.9141
CHEMBL1871	0.8785	0.8598	0.8454	0.8703	0.9298	0.9281	0.893	0.9385	0.9351
CHEMBL1900	0.8751	0.8702	0.8218	0.8734	0.9106	0.91	0.8711	0.9033	0.8984
CHEMBL1929	0.8964	0.8787	0.8688	0.8861	0.9461	0.9429	0.8874	0.9512	0.9485
CHEMBL2028	0.8026	0.8164	0.7017	0.8119	0.8282	0.8242	0.8091	0.8619	0.8666
CHEMBL2207	0.8199	0.807	0.8127	0.8034	0.8118	0.8124	0.8449	0.8534	0.8555
CHEMBL2439	0.8827	0.8666	0.8154	0.8688	0.9091	0.9005	0.853	0.901	0.9023
CHEMBL2808	0.8898	0.8913	0.7644	0.8831	0.9173	0.9165	0.8584	0.9229	0.9193
CHEMBL2820	0.9463	0.9292	0.8961	0.9332	0.9383	0.9395	0.9408	0.9484	0.9499
CHEMBL2993	0.9182	0.9154	0.8812	0.9156	0.9159	0.9158	0.9239	0.9288	0.9298
CHEMBL3045	0.8526	0.8346	0.7926	0.8325	0.9053	0.9061	0.8693	0.9162	0.9152
CHEMBL3332	0.9038	0.8699	0.854	0.8708	0.8964	0.8934	0.8689	0.8777	0.873
CHEMBL3468	0.9028	0.893	0.8561	0.8922	0.9129	0.9147	0.883	0.9073	0.9067
CHEMBL3535	0.7633	0.798	0.6298	0.7587	0.9429	0.9454	0.7603	0.9507	0.9511
CHEMBL3864	0.9172	0.9118	0.8225	0.9121	0.9568	0.9563	0.9093	0.9607	0.9629
CHEMBL3910	0.8668	0.8589	0.843	0.8555	0.8659	0.8635	0.8666	0.8736	0.8689
CHEMBL4073	0.8757	0.84	0.8339	0.8652	0.9056	0.9035	0.8786	0.9227	0.9222
CHEMBL4074	0.9075	0.9064	0.8861	0.9013	0.9003	0.9015	0.9038	0.9028	0.9041
CHEMBL4128	0.8695	0.8621	0.8297	0.8616	0.8812	0.8841	0.8854	0.906	0.9053
CHEMBL4662	0.9079	0.906	0.8852	0.9023	0.9169	0.9183	0.915	0.922	0.9192
CHEMBL5147	0.8382	0.827	0.7855	0.8358	0.8393	0.8426	0.8371	0.8435	0.8393
CHEMBL5192	0.8669	0.8334	0.8472	0.8177	0.8689	0.8689	0.8607	0.91	0.9116
CHEMBL5408	0.8769	0.8513	0.7587	0.8286	0.9477	0.9481	0.7203	0.9502	0.9499
CHEMBL6115	0.9278	0.9218	0.9099	0.9288	0.9376	0.9372	0.9379	0.9495	0.9445
CHEMBL298	0.9126	0.8799	0.8531	0.897	0.9074	0.9081	0.882	0.9072	0.9123
CHEMBL299	0.9034	0.8976	0.9052	0.91	0.9635	0.9623	0.9314	0.9624	0.9616
CHEMBL339	0.8429	0.7912	0.739	0.7669	0.8969	0.8931	0.831	0.9003	0.8974
CHEMBL1856	0.9446	0.9442	0.9089	0.943	0.9575	0.9594	0.9347	0.9386	0.9409
CHEMBL2002	0.8887	0.873	0.7125	0.8538	0.9171	0.916	0.8208	0.9146	0.9145
CHEMBL2996	0.8992	0.896	0.8802	0.8967	0.911	0.9083	0.8984	0.9101	0.91
CHEMBL2998	0.9003	0.9149	0.893	0.9079	0.9112	0.907	0.9334	0.9324	0.9308
CHEMBL3066	0.9408	0.9355	0.9004	0.9295	0.9353	0.9349	0.933	0.942	0.9418
CHEMBL3081	0.904	0.9147	0.9125	0.9071	0.9088	0.9156	0.9174	0.9285	0.9315
CHEMBL3476	0.8791	0.8637	0.7932	0.8594	0.8964	0.8906	0.868	0.9135	0.9118
CHEMBL3524	0.8764	0.8336	0.8297	0.8608	0.9349	0.9353	0.8878	0.9387	0.9385
CHEMBL3691	0.8838	0.8815	0.8727	0.8736	0.8846	0.8861	0.8975	0.892	0.8953
CHEMBL3891	0.8639	0.8529	0.8047	0.8649	0.8705	0.8674	0.8548	0.866	0.8626
CHEMBL4102	0.8262	0.8056	0.7927	0.8094	0.8533	0.8549	0.8185	0.884	0.8774
CHEMBL4117	0.7711	0.7406	0.708	0.7468	0.7384	0.7386	0.7565	0.7563	0.7527
CHEMBL4303	0.9393	0.9248	0.9151	0.935	0.9428	0.9431	0.9336	0.9414	0.9399
CHEMBL4481	0.841	0.8329	0.8077	0.8326	0.8235	0.8218	0.8525	0.8586	0.8568
CHEMBL4506	0.911	0.9114	0.8619	0.9172	0.9364	0.935	0.9066	0.9338	0.934
CHEMBL4696	0.7893	0.7626	0.7273	0.7845	0.7958	0.7974	0.778	0.7732	0.7775
CHEMBL4895	0.9156	0.8998	0.8825	0.911	0.9168	0.9151	0.9085	0.9257	0.9243
CHEMBL4937	0.9098	0.9118	0.8809	0.9061	0.9167	0.9157	0.9137	0.9255	0.9243
CHEMBL5747	0.9229	0.9189	0.873	0.9212	0.927	0.9261	0.9174	0.9389	0.9356
CHEMBL6136	0.8258	0.7948	0.7918	0.8113	0.9383	0.9411	0.8082	0.9292	0.9248
CHEMBL1075138	0.8232	0.8085	0.7699	0.7951	0.9286	0.9287	0.7849	0.9408	0.9411
CHEMBL1921666	0.9259	0.9198	0.9179	0.9193	0.9596	0.9582	0.9137	0.9546	0.9545
CHEMBL2146302	0.9422	0.9362	0.9286	0.9386	0.9488	0.9467	0.9388	0.9543	0.9513
CHEMBL2331053	0.72	0.7104	0.6541	0.6591	0.796	0.7992	0.6331	0.7845	0.7894
CHEMBL2366517	0.8879	0.8925	0.857	0.8915	0.9062	0.9082	0.8995	0.9334	0.9317
CHEMBL4523582	0.8843	0.8868	0.8393	0.8758	0.9267	0.9281	0.8932	0.922	0.9211
CHEMBL241	0.8101	0.7367	0.7111	0.7712	0.8757	0.8694	0.7437	0.8766	0.8792
CHEMBL254	0.9144	0.9148	0.8907	0.9136	0.9214	0.9257	0.9193	0.9344	0.9343
CHEMBL1855	0.9543	0.9446	0.9213	0.9409	0.9492	0.9482	0.9438	0.9503	0.9479
CHEMBL1868	0.8414	0.8328	0.8033	0.832	0.8926	0.8923	0.8417	0.9091	0.9088
CHEMBL2179	0.7548	0.7118	0.6533	0.7051	0.8008	0.8045	0.8204	0.9177	0.9199
CHEMBL2345	0.9037	0.8996	0.86	0.9035	0.9132	0.9149	0.9242	0.9313	0.9284
CHEMBL2425	0.9273	0.9176	0.8578	0.9199	0.9253	0.9253	0.9115	0.9206	0.9194
CHEMBL2431	0.9006	0.8847	0.872	0.9012	0.92	0.9165	0.8935	0.9136	0.9168
CHEMBL2593	0.9333	0.9344	0.8985	0.9212	0.9294	0.9302	0.9362	0.9422	0.9462
CHEMBL2622	0.9011	0.8924	0.8629	0.8874	0.9038	0.902	0.8904	0.9071	0.9058
CHEMBL2635	0.8148	0.7913	0.7619	0.8221	0.8448	0.8488	0.8336	0.8956	0.9014
CHEMBL2828	0.9445	0.9408	0.9407	0.9414	0.9649	0.9604	0.9451	0.9659	0.9651
CHEMBL2959	0.8829	0.8719	0.8448	0.8705	0.9065	0.9102	0.8758	0.921	0.922
CHEMBL3474	0.8624	0.85	0.8463	0.8492	0.8838	0.8801	0.8845	0.9007	0.9012
CHEMBL3475	0.8151	0.7966	0.7653	0.8055	0.8135	0.8164	0.8462	0.8505	0.8559
CHEMBL3514	0.95	0.9475	0.9356	0.9513	0.953	0.9532	0.9516	0.9556	0.9568
CHEMBL3529	0.9035	0.8821	0.8359	0.8975	0.9723	0.9727	0.8031	0.9783	0.977
CHEMBL3855	0.9392	0.9372	0.924	0.9276	0.9275	0.9272	0.9367	0.9336	0.934
CHEMBL3869	0.8885	0.8905	0.8729	0.8848	0.9171	0.9195	0.8823	0.9192	0.9161
CHEMBL3920	0.9203	0.9174	0.8998	0.9141	0.9277	0.9264	0.9218	0.9344	0.9323
CHEMBL4068	0.8823	0.8696	0.7917	0.8804	0.8943	0.8957	0.8973	0.8955	0.899
CHEMBL4093	0.8505	0.8584	0.7495	0.8477	0.9006	0.904	0.8426	0.8967	0.9015
CHEMBL4508	0.9528	0.9527	0.9476	0.9494	0.9513	0.9504	0.9575	0.9554	0.9568
CHEMBL4681	0.8442	0.8544	0.8239	0.8452	0.8734	0.8771	0.854	0.875	0.8812
CHEMBL4683	0.8952	0.8755	0.7818	0.8764	0.9712	0.969	0.9073	0.9767	0.9782
CHEMBL4860	0.9317	0.927	0.8974	0.9302	0.9316	0.929	0.93	0.9296	0.9321
CHEMBL5366	0.8812	0.8652	0.8444	0.8902	0.9727	0.9714	0.9026	0.9723	0.972
CHEMBL5979	0.771	0.7609	0.648	0.7698	0.9128	0.9104	0.7571	0.9244	0.9219
CHEMBL6135	0.9181	0.9043	0.7234	0.9199	0.9335	0.9363	0.912	0.9436	0.9418
CHEMBL208	0.8917	0.8886	0.8643	0.8863	0.9271	0.9168	0.8972	0.9395	0.9393
CHEMBL209	0.9075	0.9011	0.8864	0.8981	0.9547	0.9572	0.9074	0.9493	0.9449
CHEMBL252	0.9095	0.8919	0.8273	0.8893	0.8892	0.8889	0.8903	0.8902	0.8885
CHEMBL1808	0.8996	0.8949	0.8774	0.8972	0.9133	0.9106	0.9123	0.9211	0.9221
CHEMBL1809	0.9532	0.9406	0.8684	0.9401	0.9568	0.9552	0.9412	0.9529	0.9525
CHEMBL1853	0.8745	0.8707	0.6396	0.8474	0.8937	0.8903	0.8684	0.9045	0.9061
CHEMBL1926	0.9121	0.9043	0.845	0.9118	0.9166	0.9169	0.9217	0.9226	0.9251
CHEMBL1955	0.817	0.7952	0.7688	0.821	0.8667	0.8626	0.7968	0.8388	0.8388
CHEMBL2051	0.8447	0.8433	0.8123	0.8309	0.8325	0.8353	0.8515	0.8495	0.8466
CHEMBL2252	0.9037	0.8908	0.8865	0.8935	0.9076	0.9022	0.9169	0.926	0.9239
CHEMBL2285	0.8988	0.8991	0.8783	0.8945	0.9129	0.9136	0.8898	0.9083	0.9115
CHEMBL2508	0.8932	0.8784	0.8624	0.8742	0.8852	0.8876	0.857	0.8792	0.8808
CHEMBL2534	0.9361	0.931	0.9168	0.9296	0.936	0.9371	0.9414	0.9457	0.9413
CHEMBL3116	0.822	0.817	0.7816	0.8124	0.8501	0.8487	0.8453	0.8646	0.8644
CHEMBL3710	0.8503	0.7916	0.8024	0.8115	0.8781	0.8831	0.8678	0.9042	0.9014
CHEMBL3776	0.4492	0.3947	0.555	0.557	0.9527	0.952	0.6033	0.9563	0.9541
CHEMBL3922	0.9063	0.8957	0.887	0.8972	0.8989	0.8983	0.909	0.9106	0.9073
CHEMBL3979	0.8718	0.8808	0.8767	0.88	0.9543	0.9525	0.9251	0.9554	0.9565
CHEMBL4321	0.9339	0.9277	0.833	0.9247	0.966	0.966	0.9397	0.9728	0.9728
CHEMBL4718	0.8453	0.844	0.8114	0.8885	0.942	0.9448	0.8678	0.9218	0.9215
CHEMBL4780	0.9069	0.9	0.8868	0.897	0.9027	0.8985	0.9098	0.9225	0.9179
CHEMBL4804	0.8917	0.8695	0.8556	0.8743	0.8907	0.8904	0.8739	0.8813	0.8836
CHEMBL5407	0.8597	0.8506	0.8758	0.8551	0.8584	0.8552	0.8859	0.8856	0.8847
CHEMBL6140	0.9493	0.9471	0.9412	0.9419	0.9421	0.9412	0.946	0.9493	0.9467
CHEMBL6154	0.8366	0.8336	0.8377	0.8332	0.8459	0.8492	0.8722	0.8787	0.8763
CHEMBL1293244	0.8613	0.8385	0.7987	0.8316	0.8735	0.8741	0.8648	0.8729	0.8758
CHEMBL1741186	0.8481	0.8382	0.8219	0.8356	0.8507	0.8553	0.8648	0.8773	0.8718
CHEMBL1795116	0.8795	0.8667	0.8561	0.8236	0.9151	0.9176	0.8477	0.9037	0.9067
CHEMBL222	0.8444	0.8391	0.7885	0.8353	0.8486	0.8414	0.8323	0.8532	0.8547
CHEMBL236	0.9158	0.8884	0.8367	0.8867	0.9359	0.9344	0.8956	0.9355	0.9346
CHEMBL1947	0.9768	0.9646	0.9632	0.9617	0.9675	0.9736	0.9725	0.9792	0.9791
CHEMBL1980	0.7685	0.773	0.8058	0.7839	0.9089	0.9089	0.7548	0.9091	0.9099
CHEMBL1981	0.9212	0.9007	0.8685	0.9044	0.941	0.9427	0.9103	0.9517	0.9496
CHEMBL1994	0.7713	0.7155	0.6753	0.7591	0.8477	0.8485	0.8161	0.8673	0.8639
CHEMBL2127	0.8583	0.8507	0.8366	0.8561	0.8753	0.873	0.8681	0.8733	0.8721
CHEMBL2292	0.8634	0.8464	0.8505	0.8587	0.8926	0.8914	0.8705	0.9032	0.9012
CHEMBL2318	0.9077	0.8956	0.8627	0.8973	0.9225	0.9196	0.9185	0.93	0.9289
CHEMBL2335	0.8911	0.8893	0.8525	0.8873	0.8921	0.8901	0.8953	0.8992	0.8959
CHEMBL2527	0.9185	0.9077	0.9031	0.9134	0.9174	0.9167	0.915	0.925	0.926
CHEMBL2871	0.8107	0.7973	0.6485	0.8182	0.8356	0.8325	0.8353	0.869	0.866
CHEMBL3229	0.8272	0.8063	0.8211	0.8044	0.8344	0.8367	0.8127	0.8507	0.8496
CHEMBL3238	0.7729	0.7856	0.6766	0.7879	0.8594	0.866	0.8013	0.8745	0.8658
CHEMBL3563	0.8913	0.866	0.8581	0.8797	0.8931	0.8906	0.8784	0.9121	0.911
CHEMBL3577	0.8939	0.888	0.8479	0.89	0.8909	0.8916	0.8937	0.9003	0.9046
CHEMBL3589	0.8857	0.8802	0.8731	0.8992	0.9379	0.9373	0.9286	0.9504	0.9496
CHEMBL3629	0.9303	0.9185	0.8647	0.9127	0.9378	0.9376	0.9087	0.9507	0.949
CHEMBL4026	0.8607	0.865	0.8313	0.8665	0.8646	0.8691	0.8788	0.8629	0.8713
CHEMBL4036	0.865	0.8023	0.694	0.8267	0.911	0.9099	0.8426	0.9317	0.9326
CHEMBL4191	0.9164	0.9114	0.8942	0.907	0.925	0.9223	0.9259	0.9403	0.94
CHEMBL4393	0.9159	0.9095	0.8936	0.9004	0.9335	0.9333	0.9248	0.9449	0.9461
CHEMBL4581	0.8966	0.891	0.8748	0.8907	0.8907	0.8937	0.9096	0.9182	0.9173
CHEMBL4618	0.8229	0.8079	0.7604	0.7856	0.8123	0.8154	0.8157	0.8462	0.8465
CHEMBL4803	0.8127	0.8002	0.8104	0.7953	0.823	0.8161	0.8269	0.8378	0.8375
CHEMBL5077	0.9396	0.9411	0.9196	0.9359	0.9513	0.952	0.945	0.9499	0.9522
CHEMBL5314	0.8763	0.8688	0.829	0.8655	0.8851	0.8882	0.8711	0.9043	0.9056
CHEMBL5462	0.95	0.9528	0.9216	0.946	0.9551	0.956	0.9569	0.96	0.9604
CHEMBL1075145	0.7992	0.747	0.6093	0.7466	0.7717	0.7912	0.7623	0.8272	0.8345
CHEMBL1795177	0.8422	0.8254	0.8133	0.8523	0.8494	0.8455	0.8489	0.8469	0.8498
CHEMBL3988596	0.9231	0.9337	0.9191	0.9283	0.937	0.9352	0.9364	0.9398	0.9397
CHEMBL224	0.8584	0.8404	0.7254	0.8416	0.8666	0.8683	0.8262	0.8753	0.8723
CHEMBL227	0.9307	0.9286	0.8664	0.8836	0.9427	0.9449	0.9069	0.9409	0.9382
CHEMBL233	0.8767	0.8625	0.8012	0.8616	0.8989	0.8967	0.8636	0.9106	0.9071
CHEMBL1825	0.8698	0.8668	0.8318	0.8738	0.8721	0.8765	0.8838	0.8903	0.8844
CHEMBL1944	0.8916	0.9106	0.8548	0.8917	0.9326	0.9346	0.9243	0.941	0.941
CHEMBL1952	0.8695	0.8695	0.8434	0.8473	0.8941	0.8937	0.9039	0.92	0.9203
CHEMBL1978	0.8544	0.8407	0.8426	0.8493	0.8824	0.8782	0.8429	0.8859	0.8817
CHEMBL2041	0.8279	0.8164	0.7668	0.8096	0.8541	0.8584	0.8095	0.8699	0.8673
CHEMBL2108	0.8921	0.8879	0.8646	0.8957	0.8957	0.8993	0.8719	0.8719	0.8769
CHEMBL2243	0.9036	0.899	0.8926	0.8971	0.9051	0.9079	0.9007	0.9237	0.922
CHEMBL2334	0.9352	0.9303	0.9088	0.9326	0.9422	0.9425	0.9276	0.9416	0.9374
CHEMBL2487	0.9125	0.9096	0.8659	0.9207	0.9234	0.9241	0.9204	0.9225	0.9218
CHEMBL2525	0.9171	0.9088	0.8948	0.9014	0.9084	0.9044	0.9251	0.9254	0.9233
CHEMBL2652	0.9371	0.9277	0.8804	0.9284	0.9389	0.9383	0.9401	0.9581	0.9555
CHEMBL2730	0.8763	0.8616	0.8422	0.8547	0.8864	0.8903	0.8461	0.8829	0.884
CHEMBL2903	0.7342	0.739	0.7601	0.7259	0.8904	0.8929	0.8454	0.9107	0.9116
CHEMBL3202	0.8634	0.8019	0.7994	0.8267	0.9015	0.8992	0.7939	0.9052	0.9014
CHEMBL4550	0.9286	0.928	0.8417	0.9272	0.9293	0.9249	0.9256	0.9277	0.9295
CHEMBL4578	0.9205	0.933	0.8865	0.9275	0.9251	0.9238	0.9304	0.9337	0.9297
CHEMBL4625	0.9452	0.9333	0.904	0.9315	0.958	0.9574	0.9516	0.9608	0.9608
CHEMBL4801	0.9393	0.9256	0.9101	0.9251	0.9549	0.9538	0.9373	0.9586	0.9597
CHEMBL5103	0.8843	0.8637	0.7872	0.8709	0.9035	0.9001	0.8768	0.9041	0.9042
CHEMBL6032	0.8598	0.8479	0.8182	0.8536	0.8783	0.8807	0.8558	0.8809	0.8824
CHEMBL1293257	0.8081	0.781	0.7464	0.7927	0.8005	0.803	0.8069	0.8143	0.8119
CHEMBL1293269	0.879	0.8582	0.8431	0.866	0.871	0.8704	0.8773	0.8765	0.8745
CHEMBL2189121	0.9478	0.9307	0.7314	0.9307	0.9552	0.9573	0.9454	0.9672	0.9677
