# Supplementary material for: Leveraging bounded datapoints to classify molecular potency improvements
Source: Royal Society of Chemistry journal article supplement (doi:10.1039/d4md00325j), 2024-01-01
Supplement: d4md00325j3.xlsx [file d4md00325j3.xlsx]

## Sheet: Accuracy_1
Dataset	RF	XGB	CP	ΔCL	DΔC
CHEMBL4561	0.7385	0.749	0.6793	0.7481	0.7257
CHEMBL202	0.811	0.8082	0.742	0.8403	0.8505
CHEMBL217	0.7877	0.7742	0.7563	0.8501	0.8416
CHEMBL228	0.8165	0.821	0.7978	0.8321	0.8471
CHEMBL1785	0.8574	0.8489	0.8101	0.8596	0.8936
CHEMBL1792	0.7276	0.7387	0.7801	0.8685	0.8828
CHEMBL1801	0.6987	0.6807	0.6286	0.8207	0.829
CHEMBL1806	0.7238	0.7165	0.7648	0.8453	0.8516
CHEMBL1966	0.8093	0.7877	0.7895	0.8518	0.8752
CHEMBL2716	0.7426	0.7461	0.6622	0.8397	0.8221
CHEMBL2850	0.7948	0.781	0.7579	0.8219	0.8345
CHEMBL3024	0.8471	0.8366	0.8052	0.8772	0.9
CHEMBL3234	0.7755	0.7573	0.7321	0.7825	0.811
CHEMBL3369	0.7484	0.7362	0.6777	0.7469	0.7307
CHEMBL3568	0.8221	0.8243	0.8131	0.8132	0.828
CHEMBL3582	0.7732	0.7848	0.6312	0.7768	0.8011
CHEMBL3807	0.8545	0.8332	0.7851	0.8828	0.8918
CHEMBL4204	0.8619	0.8563	0.8376	0.859	0.8577
CHEMBL4372	0.7625	0.7587	0.6258	0.8422	0.8222
CHEMBL4588	0.8464	0.8397	0.8175	0.8445	0.878
CHEMBL5080	0.8626	0.8421	0.8407	0.8666	0.8561
CHEMBL5285	0.8531	0.8345	0.7947	0.8625	0.8692
CHEMBL5331	0.7943	0.7675	0.7279	0.7892	0.7787
CHEMBL5469	0.6258	0.6181	0.7458	0.8754	0.8866
CHEMBL5697	0.8422	0.8309	0.7984	0.8515	0.8592
CHEMBL1250348	0.7897	0.7175	0.7422	0.8558	0.8805
CHEMBL1293311	0.6208	0.6255	0.5476	0.5876	0.6248
CHEMBL1795186	0.6821	0.6857	0.7096	0.6934	0.8063
CHEMBL2189110	0.7825	0.7731	0.708	0.7649	0.7994
CHEMBL2216739	0.8398	0.8123	0.8224	0.8205	0.8169
CHEMBL3988599	0.7956	0.7566	0.7541	0.773	0.7762
CHEMBL205	0.8582	0.8486	0.7961	0.8641	0.8866
CHEMBL238	0.825	0.8186	0.817	0.8407	0.8593
CHEMBL239	0.7301	0.7223	0.7229	0.7943	0.8032
CHEMBL288	0.8412	0.8387	0.7806	0.8576	0.8621
CHEMBL1781	0.7824	0.788	0.769	0.8412	0.8557
CHEMBL1917	0.7544	0.7594	0.6766	0.8164	0.8401
CHEMBL2007	0.7618	0.7457	0.7212	0.802	0.8073
CHEMBL2563	0.7492	0.7215	0.615	0.83	0.8328
CHEMBL3286	0.7819	0.7782	0.7592	0.8346	0.8526
CHEMBL3587	0.8155	0.796	0.7664	0.8409	0.85
CHEMBL3721	0.5903	0.5519	0.5946	0.731	0.7757
CHEMBL3746	0.6462	0.6134	0.51	0.69	0.7812
CHEMBL4015	0.8011	0.7838	0.7852	0.8032	0.8115
CHEMBL4072	0.7848	0.7535	0.7545	0.842	0.8521
CHEMBL4161	0.8273	0.8234	0.7563	0.8111	0.8061
CHEMBL4439	0.8261	0.8142	0.7633	0.8376	0.8371
CHEMBL4462	0.7796	0.7722	0.7187	0.7973	0.8059
CHEMBL4599	0.7571	0.7389	0.6874	0.8139	0.8243
CHEMBL4766	0.7864	0.7567	0.7201	0.8397	0.8486
CHEMBL4835	0.8611	0.8505	0.8191	0.8748	0.8969
CHEMBL5491	0.8653	0.8481	0.7614	0.8768	0.8839
CHEMBL5543	0.71	0.726	0.6163	0.7444	0.7574
CHEMBL5620	0.8235	0.8204	0.8004	0.8484	0.8477
CHEMBL6164	0.7455	0.7387	0.7282	0.7514	0.7874
CHEMBL1163101	0.6895	0.672	0.4341	0.9194	0.9032
CHEMBL1293289	0.7444	0.7335	0.7572	0.7477	0.822
CHEMBL2169736	0.7417	0.7202	0.69	0.7996	0.8034
CHEMBL3638344	0.8677	0.8608	0.8764	0.8664	0.9092
CHEMBL4296013	0.817	0.8194	0.7048	0.8479	0.861
CHEMBL249	0.7706	0.7574	0.7093	0.7785	0.7782
CHEMBL261	0.8204	0.797	0.8005	0.8735	0.8807
CHEMBL274	0.8026	0.7962	0.7581	0.8056	0.8199
CHEMBL338	0.8313	0.8082	0.7944	0.8123	0.8358
CHEMBL1871	0.799	0.782	0.7594	0.8512	0.8535
CHEMBL1900	0.8034	0.8016	0.7507	0.8337	0.8156
CHEMBL1929	0.8023	0.7933	0.7892	0.8686	0.8797
CHEMBL2028	0.724	0.7388	0.6497	0.7399	0.7828
CHEMBL2207	0.7564	0.7397	0.7318	0.7419	0.7767
CHEMBL2439	0.7904	0.7829	0.723	0.817	0.8182
CHEMBL2808	0.8132	0.8158	0.6929	0.84	0.8384
CHEMBL2820	0.8747	0.8526	0.8121	0.8683	0.8814
CHEMBL2993	0.841	0.841	0.7953	0.8391	0.8556
CHEMBL3045	0.7639	0.7442	0.7219	0.833	0.8381
CHEMBL3332	0.8127	0.7809	0.7517	0.8147	0.7812
CHEMBL3468	0.817	0.8113	0.7709	0.838	0.8309
CHEMBL3535	0.6917	0.7351	0.6081	0.868	0.871
CHEMBL3864	0.8308	0.8281	0.7303	0.8878	0.8977
CHEMBL3910	0.7829	0.7774	0.7605	0.7826	0.7931
CHEMBL4073	0.7933	0.7529	0.7501	0.8258	0.8358
CHEMBL4074	0.8216	0.8182	0.8019	0.8244	0.8328
CHEMBL4128	0.7905	0.7825	0.751	0.8027	0.8295
CHEMBL4662	0.822	0.8238	0.797	0.8379	0.8473
CHEMBL5147	0.7621	0.7524	0.7035	0.7633	0.761
CHEMBL5192	0.783	0.758	0.7658	0.7904	0.8317
CHEMBL5408	0.7822	0.7723	0.6933	0.8691	0.8795
CHEMBL6115	0.8509	0.8469	0.8271	0.8598	0.8856
CHEMBL298	0.8275	0.7956	0.7467	0.8245	0.8238
CHEMBL299	0.8175	0.8088	0.8127	0.8967	0.9049
CHEMBL339	0.76	0.7195	0.6767	0.8133	0.8202
CHEMBL1856	0.8857	0.8845	0.8276	0.8945	0.8805
CHEMBL2002	0.8028	0.7922	0.6568	0.8325	0.8346
CHEMBL2996	0.8155	0.8181	0.7963	0.8261	0.8318
CHEMBL2998	0.8212	0.8369	0.8115	0.8222	0.8649
CHEMBL3066	0.8601	0.8563	0.8119	0.8589	0.8643
CHEMBL3081	0.8268	0.8376	0.8303	0.8391	0.8595
CHEMBL3476	0.7961	0.7805	0.7261	0.812	0.8354
CHEMBL3524	0.782	0.755	0.7436	0.8682	0.8729
CHEMBL3691	0.8047	0.8011	0.7875	0.8007	0.8191
CHEMBL3891	0.7769	0.7749	0.7312	0.7855	0.7838
CHEMBL4102	0.7521	0.7323	0.7209	0.7782	0.8052
CHEMBL4117	0.6965	0.6682	0.6351	0.6712	0.6865
CHEMBL4303	0.8709	0.8532	0.8348	0.8774	0.8664
CHEMBL4481	0.7644	0.7605	0.7335	0.7514	0.7803
CHEMBL4506	0.8434	0.8387	0.7879	0.8533	0.8713
CHEMBL4696	0.718	0.7006	0.672	0.7197	0.7122
CHEMBL4895	0.8365	0.8193	0.802	0.8347	0.8537
CHEMBL4937	0.8305	0.8431	0.7911	0.8389	0.8434
CHEMBL5747	0.8446	0.8391	0.7891	0.8527	0.8607
CHEMBL6136	0.7582	0.7352	0.7259	0.8686	0.8614
CHEMBL1075138	0.734	0.7246	0.6876	0.8478	0.8647
CHEMBL1921666	0.836	0.8267	0.8251	0.8994	0.8842
CHEMBL2146302	0.8681	0.8606	0.8525	0.8723	0.8909
CHEMBL2331053	0.6382	0.6534	0.5887	0.7272	0.7172
CHEMBL2366517	0.8035	0.8099	0.7616	0.8241	0.8514
CHEMBL4523582	0.7999	0.8009	0.7577	0.8468	0.8432
CHEMBL241	0.7358	0.6672	0.6547	0.7943	0.7999
CHEMBL254	0.8371	0.8379	0.8124	0.8469	0.8568
CHEMBL1855	0.88	0.8718	0.8304	0.8754	0.8782
CHEMBL1868	0.7559	0.7474	0.7215	0.8067	0.8324
CHEMBL2179	0.6794	0.6457	0.6263	0.7267	0.8386
CHEMBL2345	0.8244	0.819	0.7779	0.8336	0.8558
CHEMBL2425	0.8514	0.8413	0.779	0.8527	0.8415
CHEMBL2431	0.8245	0.8102	0.7886	0.8378	0.8457
CHEMBL2593	0.8516	0.8501	0.8048	0.8493	0.8725
CHEMBL2622	0.8172	0.8104	0.7809	0.8189	0.8399
CHEMBL2635	0.7341	0.7239	0.6987	0.7701	0.8336
CHEMBL2828	0.8613	0.8642	0.8606	0.893	0.9041
CHEMBL2959	0.7979	0.7927	0.7626	0.8324	0.8467
CHEMBL3474	0.7806	0.7725	0.7622	0.8026	0.8224
CHEMBL3475	0.7645	0.7432	0.7134	0.7568	0.7763
CHEMBL3514	0.8804	0.8744	0.8551	0.8842	0.8879
CHEMBL3529	0.8146	0.7995	0.7514	0.9109	0.9225
CHEMBL3855	0.8515	0.8489	0.826	0.848	0.8518
CHEMBL3869	0.8015	0.8052	0.7883	0.8382	0.8411
CHEMBL3920	0.8404	0.837	0.8167	0.8467	0.8595
CHEMBL4068	0.7986	0.7859	0.7118	0.8141	0.821
CHEMBL4093	0.7681	0.7844	0.676	0.8213	0.8191
CHEMBL4508	0.8748	0.878	0.872	0.8794	0.8788
CHEMBL4681	0.7703	0.7788	0.7474	0.8	0.8049
CHEMBL4683	0.8048	0.7922	0.6817	0.9133	0.9245
CHEMBL4860	0.855	0.8511	0.8157	0.8492	0.8626
CHEMBL5366	0.8071	0.7903	0.7514	0.9133	0.9102
CHEMBL5979	0.7055	0.6925	0.6072	0.8311	0.8444
CHEMBL6135	0.8531	0.8455	0.6599	0.8691	0.8797
CHEMBL208	0.7932	0.789	0.7668	0.831	0.8628
CHEMBL209	0.81	0.8111	0.7979	0.8818	0.8758
CHEMBL252	0.8297	0.8157	0.7519	0.8103	0.8137
CHEMBL1808	0.818	0.8106	0.7894	0.8365	0.8479
CHEMBL1809	0.8778	0.8679	0.7898	0.8957	0.8862
CHEMBL1853	0.7708	0.776	0.5993	0.8194	0.8369
CHEMBL1926	0.8362	0.8252	0.7628	0.8346	0.8451
CHEMBL1955	0.7383	0.7202	0.6972	0.781	0.7614
CHEMBL2051	0.7629	0.765	0.7336	0.7521	0.765
CHEMBL2252	0.8276	0.8148	0.8099	0.8252	0.8557
CHEMBL2285	0.8124	0.8102	0.7874	0.8295	0.834
CHEMBL2508	0.7951	0.7914	0.7683	0.7975	0.7905
CHEMBL2534	0.8585	0.8512	0.8324	0.8578	0.8737
CHEMBL3116	0.7553	0.7574	0.7152	0.7717	0.7942
CHEMBL3710	0.7704	0.701	0.7368	0.8091	0.818
CHEMBL3776	0.4899	0.4454	0.5321	0.8756	0.8789
CHEMBL3922	0.8321	0.8197	0.8094	0.821	0.8327
CHEMBL3979	0.7857	0.7938	0.7972	0.8813	0.8891
CHEMBL4321	0.8404	0.8323	0.7452	0.9009	0.9135
CHEMBL4718	0.7982	0.7974	0.7255	0.8821	0.8503
CHEMBL4780	0.8249	0.8208	0.8036	0.8213	0.8403
CHEMBL4804	0.8095	0.7917	0.7634	0.8071	0.8069
CHEMBL5407	0.7875	0.78	0.7972	0.7791	0.8083
CHEMBL6140	0.8665	0.8684	0.8608	0.8639	0.87
CHEMBL6154	0.7539	0.7563	0.7528	0.77	0.7965
CHEMBL1293244	0.77	0.7442	0.7311	0.7916	0.7908
CHEMBL1741186	0.7709	0.7608	0.7435	0.7756	0.8008
CHEMBL1795116	0.7921	0.7778	0.7737	0.8357	0.8238
CHEMBL222	0.7591	0.7508	0.7209	0.7594	0.7729
CHEMBL236	0.8246	0.804	0.7556	0.8551	0.862
CHEMBL1947	0.9083	0.893	0.8809	0.9105	0.9192
CHEMBL1980	0.6806	0.7033	0.7247	0.8383	0.8339
CHEMBL1981	0.8386	0.8159	0.7908	0.8737	0.8896
CHEMBL1994	0.6973	0.657	0.6158	0.7668	0.7844
CHEMBL2127	0.7729	0.7735	0.7621	0.7873	0.7873
CHEMBL2292	0.7774	0.7659	0.7678	0.8087	0.8247
CHEMBL2318	0.8258	0.8118	0.771	0.8476	0.8588
CHEMBL2335	0.8115	0.8059	0.769	0.8153	0.8134
CHEMBL2527	0.8425	0.8274	0.8159	0.843	0.8551
CHEMBL2871	0.7471	0.7295	0.6086	0.7633	0.7889
CHEMBL3229	0.739	0.7205	0.7378	0.7595	0.7687
CHEMBL3238	0.6858	0.7035	0.612	0.7862	0.7867
CHEMBL3563	0.803	0.779	0.77	0.8056	0.834
CHEMBL3577	0.8064	0.8044	0.7699	0.8127	0.8328
CHEMBL3589	0.8135	0.8095	0.7856	0.862	0.8775
CHEMBL3629	0.8562	0.84	0.7707	0.8637	0.8802
CHEMBL4026	0.7925	0.7939	0.7463	0.7926	0.7975
CHEMBL4036	0.7835	0.7196	0.6436	0.8305	0.8639
CHEMBL4191	0.844	0.8315	0.8096	0.8416	0.8744
CHEMBL4393	0.8334	0.8288	0.8009	0.8535	0.8744
CHEMBL4581	0.8062	0.8038	0.7852	0.8096	0.84
CHEMBL4618	0.7451	0.7276	0.6877	0.735	0.7677
CHEMBL4803	0.7397	0.7271	0.7314	0.7404	0.7632
CHEMBL5077	0.8651	0.8721	0.835	0.8837	0.8809
CHEMBL5314	0.7943	0.7961	0.749	0.802	0.8268
CHEMBL5462	0.8811	0.8811	0.8407	0.8889	0.898
CHEMBL1075145	0.7374	0.6798	0.598	0.7192	0.7576
CHEMBL1795177	0.7748	0.7647	0.7453	0.7672	0.767
CHEMBL3988596	0.8359	0.8463	0.8226	0.8543	0.8664
CHEMBL224	0.7705	0.7605	0.6805	0.7841	0.7931
CHEMBL227	0.8504	0.8521	0.7779	0.8668	0.8642
CHEMBL233	0.795	0.7755	0.713	0.8292	0.8252
CHEMBL1825	0.8067	0.793	0.7519	0.8096	0.8061
CHEMBL1944	0.8127	0.8294	0.7659	0.8523	0.8642
CHEMBL1952	0.7968	0.793	0.7669	0.8099	0.8426
CHEMBL1978	0.771	0.7608	0.7588	0.7953	0.8082
CHEMBL2041	0.7442	0.7374	0.7004	0.7762	0.7849
CHEMBL2108	0.8172	0.8076	0.7899	0.8191	0.7918
CHEMBL2243	0.8201	0.8126	0.8118	0.8272	0.8482
CHEMBL2334	0.861	0.8544	0.8299	0.8674	0.8666
CHEMBL2487	0.8333	0.8302	0.7776	0.8493	0.8572
CHEMBL2525	0.8346	0.8287	0.8058	0.8212	0.8469
CHEMBL2652	0.855	0.8482	0.7976	0.8651	0.8834
CHEMBL2730	0.7947	0.7837	0.7692	0.8094	0.8095
CHEMBL2903	0.6721	0.6678	0.6829	0.8074	0.8345
CHEMBL3202	0.7716	0.7241	0.7238	0.813	0.8261
CHEMBL4550	0.8538	0.8502	0.7558	0.8458	0.856
CHEMBL4578	0.8392	0.863	0.8067	0.8511	0.8627
CHEMBL4625	0.8672	0.8506	0.8165	0.8856	0.896
CHEMBL4801	0.8678	0.8446	0.8208	0.8827	0.895
CHEMBL5103	0.8046	0.7737	0.7225	0.8118	0.8237
CHEMBL6032	0.78	0.7601	0.7466	0.7943	0.7981
CHEMBL1293257	0.7398	0.7209	0.6857	0.7296	0.7393
CHEMBL1293269	0.7943	0.7821	0.7569	0.7917	0.8044
CHEMBL2189121	0.8757	0.8503	0.6788	0.8786	0.8996

## Sheet: F1_1
Dataset	RF	XGB	CP	ΔCL	DΔC
CHEMBL4561	0.7384	0.749	0.6793	0.7479	0.7233
CHEMBL202	0.811	0.8082	0.742	0.8406	0.8506
CHEMBL217	0.7877	0.7742	0.7563	0.8513	0.8426
CHEMBL228	0.8164	0.8209	0.7978	0.8316	0.8463
CHEMBL1785	0.8574	0.8489	0.8101	0.8604	0.8931
CHEMBL1792	0.7274	0.7385	0.7801	0.8682	0.883
CHEMBL1801	0.6987	0.6806	0.6286	0.8203	0.8297
CHEMBL1806	0.7238	0.7164	0.7648	0.8447	0.8514
CHEMBL1966	0.8093	0.7877	0.7895	0.8518	0.8756
CHEMBL2716	0.7425	0.746	0.6622	0.8401	0.8227
CHEMBL2850	0.7948	0.7809	0.7579	0.8204	0.8339
CHEMBL3024	0.8471	0.8366	0.8052	0.8771	0.8999
CHEMBL3234	0.7754	0.7573	0.7321	0.7846	0.8101
CHEMBL3369	0.7484	0.7361	0.6777	0.7468	0.7293
CHEMBL3568	0.8221	0.8242	0.8131	0.8125	0.8274
CHEMBL3582	0.7731	0.7847	0.6312	0.7749	0.8029
CHEMBL3807	0.8545	0.8331	0.7851	0.8823	0.8915
CHEMBL4204	0.8619	0.8563	0.8376	0.8593	0.8574
CHEMBL4372	0.7625	0.7587	0.6258	0.8418	0.8219
CHEMBL4588	0.8464	0.8396	0.8175	0.8446	0.8784
CHEMBL5080	0.8626	0.8421	0.8407	0.8663	0.8555
CHEMBL5285	0.8531	0.8345	0.7947	0.8616	0.8699
CHEMBL5331	0.7943	0.7675	0.7279	0.7887	0.7763
CHEMBL5469	0.6258	0.6181	0.7458	0.8765	0.8865
CHEMBL5697	0.8422	0.8308	0.7984	0.8518	0.8596
CHEMBL1250348	0.7897	0.7174	0.7422	0.8561	0.8803
CHEMBL1293311	0.6208	0.6255	0.5476	0.5883	0.6229
CHEMBL1795186	0.6819	0.6855	0.7096	0.6959	0.8054
CHEMBL2189110	0.7825	0.773	0.708	0.7643	0.7989
CHEMBL2216739	0.8398	0.8123	0.8224	0.8215	0.8165
CHEMBL3988599	0.7956	0.7565	0.7541	0.7745	0.7781
CHEMBL205	0.8582	0.8486	0.7961	0.8647	0.8871
CHEMBL238	0.8249	0.8185	0.817	0.8408	0.8594
CHEMBL239	0.7301	0.7223	0.7229	0.7953	0.8026
CHEMBL288	0.8411	0.8387	0.7806	0.8576	0.8611
CHEMBL1781	0.7824	0.7879	0.769	0.8409	0.8552
CHEMBL1917	0.7535	0.7586	0.6766	0.8173	0.84
CHEMBL2007	0.7618	0.7457	0.7212	0.802	0.8073
CHEMBL2563	0.7491	0.7214	0.615	0.8306	0.8339
CHEMBL3286	0.7819	0.7782	0.7592	0.8341	0.8535
CHEMBL3587	0.8155	0.796	0.7664	0.8406	0.8485
CHEMBL3721	0.5903	0.5519	0.5946	0.7334	0.7753
CHEMBL3746	0.6462	0.6133	0.51	0.69	0.7806
CHEMBL4015	0.8011	0.7837	0.7852	0.8029	0.8116
CHEMBL4072	0.7848	0.7535	0.7545	0.8425	0.852
CHEMBL4161	0.8273	0.8234	0.7563	0.8117	0.8058
CHEMBL4439	0.8261	0.8142	0.7633	0.8383	0.8373
CHEMBL4462	0.7796	0.7722	0.7187	0.7977	0.8062
CHEMBL4599	0.7571	0.7389	0.6874	0.8131	0.8256
CHEMBL4766	0.7863	0.7567	0.7201	0.8398	0.8484
CHEMBL4835	0.861	0.8505	0.8191	0.8744	0.8965
CHEMBL5491	0.8653	0.848	0.7614	0.877	0.8836
CHEMBL5543	0.71	0.726	0.6163	0.7442	0.7531
CHEMBL5620	0.8234	0.8204	0.8004	0.8483	0.8458
CHEMBL6164	0.7454	0.7386	0.7282	0.7505	0.7862
CHEMBL1163101	0.6895	0.672	0.4341	0.9187	0.9028
CHEMBL1293289	0.7443	0.7334	0.7572	0.7463	0.8212
CHEMBL2169736	0.7416	0.7202	0.69	0.7992	0.8041
CHEMBL3638344	0.8676	0.8608	0.8764	0.8662	0.909
CHEMBL4296013	0.817	0.8194	0.7048	0.8478	0.8598
CHEMBL249	0.7705	0.7572	0.7093	0.7796	0.7761
CHEMBL261	0.8204	0.797	0.8005	0.8739	0.8811
CHEMBL274	0.8026	0.7961	0.7581	0.8048	0.8199
CHEMBL338	0.8313	0.8081	0.7944	0.8124	0.8363
CHEMBL1871	0.7989	0.7818	0.7594	0.8511	0.8528
CHEMBL1900	0.8034	0.8015	0.7507	0.8331	0.8169
CHEMBL1929	0.8023	0.7933	0.7892	0.8686	0.8791
CHEMBL2028	0.7236	0.7383	0.6497	0.737	0.7835
CHEMBL2207	0.7564	0.7396	0.7318	0.7425	0.7768
CHEMBL2439	0.7904	0.7829	0.723	0.8179	0.8173
CHEMBL2808	0.8132	0.8157	0.6929	0.8403	0.8378
CHEMBL2820	0.8747	0.8526	0.8121	0.8675	0.8823
CHEMBL2993	0.841	0.841	0.7953	0.8397	0.8562
CHEMBL3045	0.7638	0.7441	0.7219	0.8323	0.84
CHEMBL3332	0.8127	0.7809	0.7517	0.8151	0.782
CHEMBL3468	0.817	0.8113	0.7709	0.8379	0.8322
CHEMBL3535	0.6917	0.7351	0.6081	0.8674	0.8708
CHEMBL3864	0.8308	0.8281	0.7303	0.888	0.8974
CHEMBL3910	0.7829	0.7774	0.7605	0.7824	0.7948
CHEMBL4073	0.7933	0.7528	0.7501	0.8258	0.8364
CHEMBL4074	0.8215	0.8182	0.8019	0.8248	0.8329
CHEMBL4128	0.7905	0.7825	0.751	0.8048	0.8289
CHEMBL4662	0.822	0.8238	0.797	0.8375	0.8473
CHEMBL5147	0.7621	0.7524	0.7035	0.7636	0.7602
CHEMBL5192	0.783	0.758	0.7658	0.7898	0.8311
CHEMBL5408	0.7822	0.7723	0.6933	0.8688	0.8793
CHEMBL6115	0.8509	0.8469	0.8271	0.8598	0.8855
CHEMBL298	0.8274	0.7954	0.7467	0.8239	0.8238
CHEMBL299	0.8175	0.8088	0.8127	0.8972	0.9051
CHEMBL339	0.76	0.7195	0.6767	0.8133	0.8201
CHEMBL1856	0.8857	0.8845	0.8276	0.8945	0.8817
CHEMBL2002	0.8028	0.7921	0.6568	0.8326	0.8356
CHEMBL2996	0.8155	0.818	0.7963	0.8259	0.831
CHEMBL2998	0.8211	0.8369	0.8115	0.8228	0.8644
CHEMBL3066	0.8601	0.8563	0.8119	0.8586	0.8641
CHEMBL3081	0.8268	0.8376	0.8303	0.839	0.8594
CHEMBL3476	0.7961	0.7805	0.7261	0.8122	0.8348
CHEMBL3524	0.7819	0.7549	0.7436	0.8682	0.8725
CHEMBL3691	0.8046	0.8011	0.7875	0.7999	0.8191
CHEMBL3891	0.7768	0.7747	0.7312	0.786	0.7843
CHEMBL4102	0.7521	0.7322	0.7209	0.7783	0.8066
CHEMBL4117	0.6965	0.6682	0.6351	0.6707	0.6875
CHEMBL4303	0.8709	0.8532	0.8348	0.8775	0.8673
CHEMBL4481	0.7644	0.7604	0.7335	0.7497	0.7782
CHEMBL4506	0.8433	0.8386	0.7879	0.8536	0.8704
CHEMBL4696	0.718	0.7006	0.672	0.7199	0.7134
CHEMBL4895	0.8365	0.8192	0.802	0.8343	0.854
CHEMBL4937	0.8305	0.8431	0.7911	0.8388	0.8435
CHEMBL5747	0.8446	0.8391	0.7891	0.8533	0.8599
CHEMBL6136	0.7582	0.7351	0.7259	0.8693	0.8612
CHEMBL1075138	0.7339	0.7245	0.6876	0.8491	0.8654
CHEMBL1921666	0.836	0.8266	0.8251	0.8992	0.8841
CHEMBL2146302	0.8681	0.8606	0.8525	0.8724	0.8907
CHEMBL2331053	0.6347	0.6529	0.5887	0.7273	0.7179
CHEMBL2366517	0.8035	0.8099	0.7616	0.8234	0.8502
CHEMBL4523582	0.7999	0.8009	0.7577	0.8462	0.8439
CHEMBL241	0.7358	0.6672	0.6547	0.7921	0.7999
CHEMBL254	0.8371	0.8378	0.8124	0.8478	0.8578
CHEMBL1855	0.88	0.8717	0.8304	0.8753	0.8771
CHEMBL1868	0.7559	0.7474	0.7215	0.8067	0.8319
CHEMBL2179	0.6787	0.645	0.6263	0.7275	0.8378
CHEMBL2345	0.8244	0.819	0.7779	0.8334	0.856
CHEMBL2425	0.8513	0.8413	0.779	0.8533	0.8414
CHEMBL2431	0.8245	0.8101	0.7886	0.8375	0.8452
CHEMBL2593	0.8516	0.8501	0.8048	0.8496	0.873
CHEMBL2622	0.8172	0.8103	0.7809	0.8189	0.8396
CHEMBL2635	0.7341	0.7238	0.6987	0.7716	0.8346
CHEMBL2828	0.8613	0.8642	0.8606	0.8929	0.9039
CHEMBL2959	0.7979	0.7926	0.7626	0.8319	0.8463
CHEMBL3474	0.7805	0.7723	0.7622	0.8009	0.8227
CHEMBL3475	0.7645	0.7432	0.7134	0.7575	0.7795
CHEMBL3514	0.8803	0.8743	0.8551	0.8846	0.8885
CHEMBL3529	0.8146	0.7995	0.7514	0.9109	0.9226
CHEMBL3855	0.8515	0.8489	0.826	0.8478	0.8511
CHEMBL3869	0.8015	0.8052	0.7883	0.8375	0.8405
CHEMBL3920	0.8404	0.837	0.8167	0.8464	0.8591
CHEMBL4068	0.7985	0.7859	0.7118	0.8136	0.8206
CHEMBL4093	0.7681	0.7843	0.676	0.8221	0.8197
CHEMBL4508	0.8748	0.8779	0.872	0.88	0.8795
CHEMBL4681	0.7703	0.7788	0.7474	0.8	0.805
CHEMBL4683	0.8048	0.7922	0.6817	0.9133	0.9244
CHEMBL4860	0.855	0.851	0.8157	0.8492	0.8626
CHEMBL5366	0.807	0.7901	0.7514	0.9131	0.9102
CHEMBL5979	0.7055	0.6925	0.6072	0.8309	0.8453
CHEMBL6135	0.8531	0.8454	0.6599	0.869	0.8801
CHEMBL208	0.7932	0.7889	0.7668	0.8314	0.8634
CHEMBL209	0.81	0.8111	0.7979	0.8821	0.876
CHEMBL252	0.8297	0.8157	0.7519	0.8108	0.8145
CHEMBL1808	0.8179	0.8105	0.7894	0.8374	0.8479
CHEMBL1809	0.8778	0.8679	0.7898	0.8959	0.8853
CHEMBL1853	0.7704	0.7757	0.5993	0.8203	0.8364
CHEMBL1926	0.8362	0.8252	0.7628	0.8354	0.8461
CHEMBL1955	0.7383	0.7202	0.6972	0.7813	0.7608
CHEMBL2051	0.7628	0.7649	0.7336	0.7528	0.7618
CHEMBL2252	0.8276	0.8148	0.8099	0.8254	0.8553
CHEMBL2285	0.8124	0.8102	0.7874	0.8286	0.8342
CHEMBL2508	0.7951	0.7914	0.7683	0.7981	0.7916
CHEMBL2534	0.8585	0.8512	0.8324	0.8573	0.8735
CHEMBL3116	0.7552	0.7574	0.7152	0.7711	0.7945
CHEMBL3710	0.7704	0.701	0.7368	0.8105	0.8159
CHEMBL3776	0.4899	0.4454	0.5321	0.8754	0.8786
CHEMBL3922	0.8321	0.8197	0.8094	0.8213	0.8335
CHEMBL3979	0.7857	0.7937	0.7972	0.8817	0.8887
CHEMBL4321	0.8404	0.8322	0.7452	0.9011	0.913
CHEMBL4718	0.7982	0.7974	0.7255	0.882	0.851
CHEMBL4780	0.8249	0.8208	0.8036	0.821	0.841
CHEMBL4804	0.8095	0.7917	0.7634	0.8062	0.807
CHEMBL5407	0.7874	0.7799	0.7972	0.7777	0.8083
CHEMBL6140	0.8664	0.8684	0.8608	0.8635	0.8699
CHEMBL6154	0.7539	0.7563	0.7528	0.772	0.7957
CHEMBL1293244	0.7698	0.7438	0.7311	0.7928	0.793
CHEMBL1741186	0.7709	0.7608	0.7435	0.7755	0.8018
CHEMBL1795116	0.792	0.7778	0.7737	0.8339	0.824
CHEMBL222	0.759	0.7507	0.7209	0.7591	0.7716
CHEMBL236	0.8246	0.804	0.7556	0.8553	0.8627
CHEMBL1947	0.9083	0.8929	0.8809	0.9104	0.9196
CHEMBL1980	0.6806	0.7033	0.7247	0.8392	0.8333
CHEMBL1981	0.8386	0.8159	0.7908	0.8734	0.8899
CHEMBL1994	0.6973	0.6569	0.6158	0.7668	0.7837
CHEMBL2127	0.7728	0.7735	0.7621	0.7878	0.7877
CHEMBL2292	0.7774	0.7658	0.7678	0.8099	0.8235
CHEMBL2318	0.8258	0.8117	0.771	0.8488	0.8603
CHEMBL2335	0.8115	0.8059	0.769	0.8147	0.812
CHEMBL2527	0.8425	0.8274	0.8159	0.8416	0.8555
CHEMBL2871	0.747	0.7294	0.6086	0.764	0.7881
CHEMBL3229	0.739	0.7205	0.7378	0.7608	0.7686
CHEMBL3238	0.6857	0.7035	0.612	0.7871	0.7866
CHEMBL3563	0.8029	0.779	0.77	0.8045	0.8341
CHEMBL3577	0.8064	0.8043	0.7699	0.8118	0.8307
CHEMBL3589	0.8135	0.8095	0.7856	0.8623	0.8775
CHEMBL3629	0.8562	0.8399	0.7707	0.8636	0.8802
CHEMBL4026	0.7924	0.7938	0.7463	0.7932	0.7984
CHEMBL4036	0.7834	0.7196	0.6436	0.8303	0.8637
CHEMBL4191	0.844	0.8315	0.8096	0.8423	0.8743
CHEMBL4393	0.8334	0.8288	0.8009	0.854	0.874
CHEMBL4581	0.8062	0.8038	0.7852	0.8092	0.84
CHEMBL4618	0.7451	0.7275	0.6877	0.7343	0.7698
CHEMBL4803	0.7397	0.7271	0.7314	0.7393	0.7644
CHEMBL5077	0.865	0.872	0.835	0.8838	0.8809
CHEMBL5314	0.7942	0.796	0.749	0.8008	0.8276
CHEMBL5462	0.881	0.8811	0.8407	0.8885	0.8982
CHEMBL1075145	0.7374	0.6798	0.598	0.722	0.7581
CHEMBL1795177	0.7748	0.7647	0.7453	0.7667	0.764
CHEMBL3988596	0.8359	0.8463	0.8226	0.8544	0.8664
CHEMBL224	0.7705	0.7604	0.6805	0.7819	0.794
CHEMBL227	0.8504	0.8521	0.7779	0.8673	0.8637
CHEMBL233	0.7949	0.7753	0.713	0.8301	0.8264
CHEMBL1825	0.8067	0.793	0.7519	0.8105	0.8041
CHEMBL1944	0.8127	0.8293	0.7659	0.852	0.8642
CHEMBL1952	0.7968	0.793	0.7669	0.8093	0.842
CHEMBL1978	0.771	0.7607	0.7588	0.7945	0.8078
CHEMBL2041	0.7442	0.7374	0.7004	0.7762	0.787
CHEMBL2108	0.8172	0.8076	0.7899	0.8177	0.7934
CHEMBL2243	0.8201	0.8126	0.8118	0.8266	0.8492
CHEMBL2334	0.861	0.8544	0.8299	0.8677	0.867
CHEMBL2487	0.8333	0.8302	0.7776	0.849	0.8567
CHEMBL2525	0.8345	0.8287	0.8058	0.8218	0.8464
CHEMBL2652	0.855	0.8482	0.7976	0.8651	0.8832
CHEMBL2730	0.7947	0.7837	0.7692	0.8091	0.8074
CHEMBL2903	0.6721	0.6677	0.6829	0.8084	0.8363
CHEMBL3202	0.7715	0.724	0.7238	0.8128	0.8264
CHEMBL4550	0.8538	0.8502	0.7558	0.8459	0.8561
CHEMBL4578	0.8392	0.863	0.8067	0.8517	0.8627
CHEMBL4625	0.8672	0.8506	0.8165	0.8861	0.896
CHEMBL4801	0.8678	0.8446	0.8208	0.8829	0.8948
CHEMBL5103	0.8046	0.7736	0.7225	0.8119	0.8248
CHEMBL6032	0.78	0.7601	0.7466	0.7935	0.7969
CHEMBL1293257	0.7398	0.7209	0.6857	0.7316	0.7396
CHEMBL1293269	0.7943	0.7821	0.7569	0.7911	0.8046
CHEMBL2189121	0.8757	0.8502	0.6788	0.8789	0.8996

## Sheet: AUC_1
Dataset	RF	XGB	CP	ΔCL	DΔC
CHEMBL4561	0.8152	0.8239	0.7434	0.8228	0.8066
CHEMBL202	0.8924	0.8873	0.8102	0.92	0.9216
CHEMBL217	0.877	0.8565	0.8296	0.9227	0.9145
CHEMBL228	0.8994	0.8982	0.8799	0.9131	0.9219
CHEMBL1785	0.9336	0.9263	0.8947	0.9375	0.9614
CHEMBL1792	0.8386	0.838	0.8722	0.9449	0.9561
CHEMBL1801	0.7671	0.6984	0.7041	0.9006	0.9074
CHEMBL1806	0.7954	0.7777	0.8371	0.9174	0.9261
CHEMBL1966	0.8949	0.8731	0.8715	0.9322	0.9402
CHEMBL2716	0.8219	0.8176	0.7271	0.9168	0.908
CHEMBL2850	0.8745	0.8587	0.8353	0.8966	0.9122
CHEMBL3024	0.9313	0.9181	0.8899	0.9496	0.961
CHEMBL3234	0.8582	0.8386	0.8058	0.8643	0.8897
CHEMBL3369	0.8184	0.8	0.7474	0.8288	0.8057
CHEMBL3568	0.9082	0.9078	0.8927	0.9005	0.9044
CHEMBL3582	0.8562	0.8669	0.6675	0.8577	0.8811
CHEMBL3807	0.9353	0.9078	0.8748	0.9515	0.9579
CHEMBL4204	0.9347	0.9286	0.9181	0.9329	0.9226
CHEMBL4372	0.8486	0.8327	0.6924	0.9152	0.8969
CHEMBL4588	0.9212	0.9135	0.9	0.919	0.9419
CHEMBL5080	0.9415	0.9214	0.9263	0.9438	0.9356
CHEMBL5285	0.9296	0.9175	0.8725	0.9322	0.9412
CHEMBL5331	0.869	0.8499	0.8083	0.8691	0.8479
CHEMBL5469	0.6481	0.6491	0.8033	0.9565	0.958
CHEMBL5697	0.9108	0.9001	0.8673	0.9234	0.928
CHEMBL1250348	0.8799	0.7851	0.8272	0.9248	0.9371
CHEMBL1293311	0.6805	0.6871	0.5918	0.6332	0.6783
CHEMBL1795186	0.7366	0.7361	0.7957	0.7392	0.8806
CHEMBL2189110	0.8719	0.8567	0.7825	0.85	0.8824
CHEMBL2216739	0.9222	0.8941	0.8992	0.902	0.8878
CHEMBL3988599	0.8781	0.8364	0.8386	0.8457	0.8513
CHEMBL205	0.9209	0.8984	0.8735	0.9365	0.9492
CHEMBL238	0.9086	0.8962	0.8957	0.9181	0.9363
CHEMBL239	0.8046	0.7939	0.7942	0.8774	0.8778
CHEMBL288	0.926	0.9216	0.8638	0.9326	0.9349
CHEMBL1781	0.8691	0.8735	0.8551	0.9184	0.9341
CHEMBL1917	0.8175	0.823	0.7469	0.8947	0.9123
CHEMBL2007	0.847	0.8296	0.7914	0.8854	0.8844
CHEMBL2563	0.8196	0.7883	0.6725	0.9083	0.9035
CHEMBL3286	0.8679	0.8657	0.8334	0.9129	0.932
CHEMBL3587	0.8941	0.8646	0.8403	0.9199	0.9231
CHEMBL3721	0.6533	0.5983	0.6259	0.808	0.8502
CHEMBL3746	0.6936	0.6448	0.5258	0.7768	0.8553
CHEMBL4015	0.8843	0.8631	0.8679	0.8835	0.8861
CHEMBL4072	0.8689	0.8336	0.8374	0.9236	0.9255
CHEMBL4161	0.9026	0.8955	0.8421	0.8898	0.8901
CHEMBL4439	0.9078	0.8961	0.8479	0.919	0.9191
CHEMBL4462	0.8632	0.8498	0.7908	0.8758	0.8799
CHEMBL4599	0.8244	0.805	0.7681	0.8927	0.8949
CHEMBL4766	0.8671	0.8338	0.791	0.9165	0.9188
CHEMBL4835	0.9346	0.9351	0.9129	0.9469	0.9667
CHEMBL5491	0.944	0.9276	0.856	0.9501	0.9539
CHEMBL5543	0.7869	0.7838	0.6578	0.822	0.8411
CHEMBL5620	0.9117	0.9075	0.8928	0.9296	0.9301
CHEMBL6164	0.8251	0.8227	0.8046	0.8291	0.8632
CHEMBL1163101	0.791	0.7347	0.4336	0.9682	0.9645
CHEMBL1293289	0.8224	0.8119	0.8365	0.8048	0.8949
CHEMBL2169736	0.8282	0.8086	0.7669	0.8815	0.8781
CHEMBL3638344	0.9556	0.9495	0.9584	0.9456	0.9709
CHEMBL4296013	0.8935	0.896	0.7793	0.9239	0.9312
CHEMBL249	0.8492	0.835	0.787	0.8619	0.8603
CHEMBL261	0.9084	0.8911	0.8919	0.9417	0.9533
CHEMBL274	0.8883	0.8777	0.8476	0.8914	0.8957
CHEMBL338	0.9115	0.8927	0.8807	0.8963	0.9141
CHEMBL1871	0.8785	0.8598	0.8454	0.9281	0.9351
CHEMBL1900	0.8751	0.8702	0.8218	0.91	0.8984
CHEMBL1929	0.8964	0.8787	0.8688	0.9429	0.9485
CHEMBL2028	0.8026	0.8164	0.7017	0.8242	0.8666
CHEMBL2207	0.8199	0.807	0.8127	0.8124	0.8555
CHEMBL2439	0.8827	0.8666	0.8154	0.9005	0.9023
CHEMBL2808	0.8898	0.8913	0.7644	0.9165	0.9193
CHEMBL2820	0.9463	0.9292	0.8961	0.9395	0.9499
CHEMBL2993	0.9182	0.9154	0.8812	0.9158	0.9298
CHEMBL3045	0.8526	0.8346	0.7926	0.9061	0.9152
CHEMBL3332	0.9038	0.8699	0.854	0.8934	0.873
CHEMBL3468	0.9028	0.893	0.8561	0.9147	0.9067
CHEMBL3535	0.7633	0.798	0.6298	0.9454	0.9511
CHEMBL3864	0.9172	0.9118	0.8225	0.9563	0.9629
CHEMBL3910	0.8668	0.8589	0.843	0.8635	0.8689
CHEMBL4073	0.8757	0.84	0.8339	0.9035	0.9222
CHEMBL4074	0.9075	0.9064	0.8861	0.9015	0.9041
CHEMBL4128	0.8695	0.8621	0.8297	0.8841	0.9053
CHEMBL4662	0.9079	0.906	0.8852	0.9183	0.9192
CHEMBL5147	0.8382	0.827	0.7855	0.8426	0.8393
CHEMBL5192	0.8669	0.8334	0.8472	0.8689	0.9116
CHEMBL5408	0.8769	0.8513	0.7587	0.9481	0.9499
CHEMBL6115	0.9278	0.9218	0.9099	0.9372	0.9445
CHEMBL298	0.9126	0.8799	0.8531	0.9081	0.9123
CHEMBL299	0.9034	0.8976	0.9052	0.9623	0.9616
CHEMBL339	0.8429	0.7912	0.739	0.8931	0.8974
CHEMBL1856	0.9446	0.9442	0.9089	0.9594	0.9409
CHEMBL2002	0.8887	0.873	0.7125	0.916	0.9145
CHEMBL2996	0.8992	0.896	0.8802	0.9083	0.91
CHEMBL2998	0.9003	0.9149	0.893	0.907	0.9308
CHEMBL3066	0.9408	0.9355	0.9004	0.9349	0.9418
CHEMBL3081	0.904	0.9147	0.9125	0.9156	0.9315
CHEMBL3476	0.8791	0.8637	0.7932	0.8906	0.9118
CHEMBL3524	0.8764	0.8336	0.8297	0.9353	0.9385
CHEMBL3691	0.8838	0.8815	0.8727	0.8861	0.8953
CHEMBL3891	0.8639	0.8529	0.8047	0.8674	0.8626
CHEMBL4102	0.8262	0.8056	0.7927	0.8549	0.8774
CHEMBL4117	0.7711	0.7406	0.708	0.7386	0.7527
CHEMBL4303	0.9393	0.9248	0.9151	0.9431	0.9399
CHEMBL4481	0.841	0.8329	0.8077	0.8218	0.8568
CHEMBL4506	0.911	0.9114	0.8619	0.935	0.934
CHEMBL4696	0.7893	0.7626	0.7273	0.7974	0.7775
CHEMBL4895	0.9156	0.8998	0.8825	0.9151	0.9243
CHEMBL4937	0.9098	0.9118	0.8809	0.9157	0.9243
CHEMBL5747	0.9229	0.9189	0.873	0.9261	0.9356
CHEMBL6136	0.8258	0.7948	0.7918	0.9411	0.9248
CHEMBL1075138	0.8232	0.8085	0.7699	0.9287	0.9411
CHEMBL1921666	0.9259	0.9198	0.9179	0.9582	0.9545
CHEMBL2146302	0.9422	0.9362	0.9286	0.9467	0.9513
CHEMBL2331053	0.72	0.7104	0.6541	0.7992	0.7894
CHEMBL2366517	0.8879	0.8925	0.857	0.9082	0.9317
CHEMBL4523582	0.8843	0.8868	0.8393	0.9281	0.9211
CHEMBL241	0.8101	0.7367	0.7111	0.8694	0.8792
CHEMBL254	0.9144	0.9148	0.8907	0.9257	0.9343
CHEMBL1855	0.9543	0.9446	0.9213	0.9482	0.9479
CHEMBL1868	0.8414	0.8328	0.8033	0.8923	0.9088
CHEMBL2179	0.7548	0.7118	0.6533	0.8045	0.9199
CHEMBL2345	0.9037	0.8996	0.86	0.9149	0.9284
CHEMBL2425	0.9273	0.9176	0.8578	0.9253	0.9194
CHEMBL2431	0.9006	0.8847	0.872	0.9165	0.9168
CHEMBL2593	0.9333	0.9344	0.8985	0.9302	0.9462
CHEMBL2622	0.9011	0.8924	0.8629	0.902	0.9058
CHEMBL2635	0.8148	0.7913	0.7619	0.8488	0.9014
CHEMBL2828	0.9445	0.9408	0.9407	0.9604	0.9651
CHEMBL2959	0.8829	0.8719	0.8448	0.9102	0.922
CHEMBL3474	0.8624	0.85	0.8463	0.8801	0.9012
CHEMBL3475	0.8151	0.7966	0.7653	0.8164	0.8559
CHEMBL3514	0.95	0.9475	0.9356	0.9532	0.9568
CHEMBL3529	0.9035	0.8821	0.8359	0.9727	0.977
CHEMBL3855	0.9392	0.9372	0.924	0.9272	0.934
CHEMBL3869	0.8885	0.8905	0.8729	0.9195	0.9161
CHEMBL3920	0.9203	0.9174	0.8998	0.9264	0.9323
CHEMBL4068	0.8823	0.8696	0.7917	0.8957	0.899
CHEMBL4093	0.8505	0.8584	0.7495	0.904	0.9015
CHEMBL4508	0.9528	0.9527	0.9476	0.9504	0.9568
CHEMBL4681	0.8442	0.8544	0.8239	0.8771	0.8812
CHEMBL4683	0.8952	0.8755	0.7818	0.969	0.9782
CHEMBL4860	0.9317	0.927	0.8974	0.929	0.9321
CHEMBL5366	0.8812	0.8652	0.8444	0.9714	0.972
CHEMBL5979	0.771	0.7609	0.648	0.9104	0.9219
CHEMBL6135	0.9181	0.9043	0.7234	0.9363	0.9418
CHEMBL208	0.8917	0.8886	0.8643	0.9168	0.9393
CHEMBL209	0.9075	0.9011	0.8864	0.9572	0.9449
CHEMBL252	0.9095	0.8919	0.8273	0.8889	0.8885
CHEMBL1808	0.8996	0.8949	0.8774	0.9106	0.9221
CHEMBL1809	0.9532	0.9406	0.8684	0.9552	0.9525
CHEMBL1853	0.8745	0.8707	0.6396	0.8903	0.9061
CHEMBL1926	0.9121	0.9043	0.845	0.9169	0.9251
CHEMBL1955	0.817	0.7952	0.7688	0.8626	0.8388
CHEMBL2051	0.8447	0.8433	0.8123	0.8353	0.8466
CHEMBL2252	0.9037	0.8908	0.8865	0.9022	0.9239
CHEMBL2285	0.8988	0.8991	0.8783	0.9136	0.9115
CHEMBL2508	0.8932	0.8784	0.8624	0.8876	0.8808
CHEMBL2534	0.9361	0.931	0.9168	0.9371	0.9413
CHEMBL3116	0.822	0.817	0.7816	0.8487	0.8644
CHEMBL3710	0.8503	0.7916	0.8024	0.8831	0.9014
CHEMBL3776	0.4492	0.3947	0.555	0.952	0.9541
CHEMBL3922	0.9063	0.8957	0.887	0.8983	0.9073
CHEMBL3979	0.8718	0.8808	0.8767	0.9525	0.9565
CHEMBL4321	0.9339	0.9277	0.833	0.966	0.9728
CHEMBL4718	0.8453	0.844	0.8114	0.9448	0.9215
CHEMBL4780	0.9069	0.9	0.8868	0.8985	0.9179
CHEMBL4804	0.8917	0.8695	0.8556	0.8904	0.8836
CHEMBL5407	0.8597	0.8506	0.8758	0.8552	0.8847
CHEMBL6140	0.9493	0.9471	0.9412	0.9412	0.9467
CHEMBL6154	0.8366	0.8336	0.8377	0.8492	0.8763
CHEMBL1293244	0.8613	0.8385	0.7987	0.8741	0.8758
CHEMBL1741186	0.8481	0.8382	0.8219	0.8553	0.8718
CHEMBL1795116	0.8795	0.8667	0.8561	0.9176	0.9067
CHEMBL222	0.8444	0.8391	0.7885	0.8414	0.8547
CHEMBL236	0.9158	0.8884	0.8367	0.9344	0.9346
CHEMBL1947	0.9768	0.9646	0.9632	0.9736	0.9791
CHEMBL1980	0.7685	0.773	0.8058	0.9089	0.9099
CHEMBL1981	0.9212	0.9007	0.8685	0.9427	0.9496
CHEMBL1994	0.7713	0.7155	0.6753	0.8485	0.8639
CHEMBL2127	0.8583	0.8507	0.8366	0.873	0.8721
CHEMBL2292	0.8634	0.8464	0.8505	0.8914	0.9012
CHEMBL2318	0.9077	0.8956	0.8627	0.9196	0.9289
CHEMBL2335	0.8911	0.8893	0.8525	0.8901	0.8959
CHEMBL2527	0.9185	0.9077	0.9031	0.9167	0.926
CHEMBL2871	0.8107	0.7973	0.6485	0.8325	0.866
CHEMBL3229	0.8272	0.8063	0.8211	0.8367	0.8496
CHEMBL3238	0.7729	0.7856	0.6766	0.866	0.8658
CHEMBL3563	0.8913	0.866	0.8581	0.8906	0.911
CHEMBL3577	0.8939	0.888	0.8479	0.8916	0.9046
CHEMBL3589	0.8857	0.8802	0.8731	0.9373	0.9496
CHEMBL3629	0.9303	0.9185	0.8647	0.9376	0.949
CHEMBL4026	0.8607	0.865	0.8313	0.8691	0.8713
CHEMBL4036	0.865	0.8023	0.694	0.9099	0.9326
CHEMBL4191	0.9164	0.9114	0.8942	0.9223	0.94
CHEMBL4393	0.9159	0.9095	0.8936	0.9333	0.9461
CHEMBL4581	0.8966	0.891	0.8748	0.8937	0.9173
CHEMBL4618	0.8229	0.8079	0.7604	0.8154	0.8465
CHEMBL4803	0.8127	0.8002	0.8104	0.8161	0.8375
CHEMBL5077	0.9396	0.9411	0.9196	0.952	0.9522
CHEMBL5314	0.8763	0.8688	0.829	0.8882	0.9056
CHEMBL5462	0.95	0.9528	0.9216	0.956	0.9604
CHEMBL1075145	0.7992	0.747	0.6093	0.7912	0.8345
CHEMBL1795177	0.8422	0.8254	0.8133	0.8455	0.8498
CHEMBL3988596	0.9231	0.9337	0.9191	0.9352	0.9397
CHEMBL224	0.8584	0.8404	0.7254	0.8683	0.8723
CHEMBL227	0.9307	0.9286	0.8664	0.9449	0.9382
CHEMBL233	0.8767	0.8625	0.8012	0.8967	0.9071
CHEMBL1825	0.8698	0.8668	0.8318	0.8765	0.8844
CHEMBL1944	0.8916	0.9106	0.8548	0.9346	0.941
CHEMBL1952	0.8695	0.8695	0.8434	0.8937	0.9203
CHEMBL1978	0.8544	0.8407	0.8426	0.8782	0.8817
CHEMBL2041	0.8279	0.8164	0.7668	0.8584	0.8673
CHEMBL2108	0.8921	0.8879	0.8646	0.8993	0.8769
CHEMBL2243	0.9036	0.899	0.8926	0.9079	0.922
CHEMBL2334	0.9352	0.9303	0.9088	0.9425	0.9374
CHEMBL2487	0.9125	0.9096	0.8659	0.9241	0.9218
CHEMBL2525	0.9171	0.9088	0.8948	0.9044	0.9233
CHEMBL2652	0.9371	0.9277	0.8804	0.9383	0.9555
CHEMBL2730	0.8763	0.8616	0.8422	0.8903	0.884
CHEMBL2903	0.7342	0.739	0.7601	0.8929	0.9116
CHEMBL3202	0.8634	0.8019	0.7994	0.8992	0.9014
CHEMBL4550	0.9286	0.928	0.8417	0.9249	0.9295
CHEMBL4578	0.9205	0.933	0.8865	0.9238	0.9297
CHEMBL4625	0.9452	0.9333	0.904	0.9574	0.9608
CHEMBL4801	0.9393	0.9256	0.9101	0.9538	0.9597
CHEMBL5103	0.8843	0.8637	0.7872	0.9001	0.9042
CHEMBL6032	0.8598	0.8479	0.8182	0.8807	0.8824
CHEMBL1293257	0.8081	0.781	0.7464	0.803	0.8119
CHEMBL1293269	0.879	0.8582	0.8431	0.8704	0.8745
CHEMBL2189121	0.9478	0.9307	0.7314	0.9573	0.9677

## Sheet: Accuracy_2
Dataset	RF	XGB	CP	ΔCL	DΔC
CHEMBL4561	0.7343	0.7431	0.6836	0.7453	0.7373
CHEMBL202	0.8095	0.7952	0.7378	0.8385	0.8491
CHEMBL217	0.7856	0.7717	0.7547	0.8493	0.8466
CHEMBL228	0.8142	0.8125	0.7878	0.8413	0.8397
CHEMBL1785	0.8626	0.8572	0.8091	0.8658	0.8847
CHEMBL1792	0.7365	0.7487	0.7803	0.8606	0.8842
CHEMBL1801	0.7056	0.7013	0.6422	0.8225	0.8356
CHEMBL1806	0.7169	0.7142	0.7733	0.845	0.8569
CHEMBL1966	0.8059	0.7869	0.7919	0.8484	0.8716
CHEMBL2716	0.7369	0.7129	0.6654	0.8388	0.8223
CHEMBL2850	0.7923	0.7598	0.7586	0.816	0.817
CHEMBL3024	0.8528	0.8486	0.8046	0.883	0.9039
CHEMBL3234	0.7645	0.7464	0.7337	0.7751	0.8058
CHEMBL3369	0.7193	0.7195	0.6744	0.7312	0.7331
CHEMBL3568	0.8179	0.8136	0.8059	0.8101	0.828
CHEMBL3582	0.7821	0.7761	0.6245	0.782	0.812
CHEMBL3807	0.8551	0.8492	0.7788	0.8812	0.8907
CHEMBL4204	0.8676	0.8723	0.839	0.8665	0.8624
CHEMBL4372	0.7809	0.7558	0.6727	0.8279	0.8198
CHEMBL4588	0.8385	0.8351	0.805	0.8479	0.8717
CHEMBL5080	0.8608	0.8461	0.8488	0.8625	0.8565
CHEMBL5285	0.8588	0.8511	0.7986	0.8759	0.8733
CHEMBL5331	0.7949	0.7874	0.7261	0.7985	0.7992
CHEMBL5469	0.59	0.6612	0.7374	0.8717	0.8853
CHEMBL5697	0.8227	0.8148	0.7905	0.8387	0.8547
CHEMBL1250348	0.7808	0.7296	0.7351	0.8513	0.8844
CHEMBL1293311	0.6276	0.6123	0.5588	0.5918	0.6208
CHEMBL1795186	0.6808	0.682	0.7235	0.6883	0.827
CHEMBL2189110	0.7784	0.7694	0.7097	0.78	0.7877
CHEMBL2216739	0.8385	0.8224	0.8221	0.8189	0.8202
CHEMBL3988599	0.8003	0.7722	0.7719	0.7808	0.7788
CHEMBL205	0.8549	0.8494	0.7965	0.8638	0.879
CHEMBL238	0.8352	0.8221	0.8157	0.8471	0.8728
CHEMBL239	0.7347	0.72	0.7251	0.7864	0.7968
CHEMBL288	0.8478	0.8336	0.7789	0.8588	0.8634
CHEMBL1781	0.7959	0.7888	0.7841	0.8446	0.8609
CHEMBL1917	0.7624	0.7739	0.6697	0.8283	0.8508
CHEMBL2007	0.7553	0.7477	0.7016	0.8015	0.7975
CHEMBL2563	0.7631	0.7375	0.6229	0.8462	0.838
CHEMBL3286	0.7798	0.7863	0.7488	0.8298	0.8538
CHEMBL3587	0.8107	0.8004	0.7723	0.8371	0.8565
CHEMBL3721	0.6197	0.5972	0.5813	0.7333	0.777
CHEMBL3746	0.6385	0.6039	0.5015	0.7181	0.7754
CHEMBL4015	0.8023	0.785	0.7908	0.8108	0.8215
CHEMBL4072	0.7814	0.754	0.7636	0.8395	0.8595
CHEMBL4161	0.8377	0.8193	0.768	0.8222	0.8154
CHEMBL4439	0.8251	0.8214	0.7749	0.8311	0.8378
CHEMBL4462	0.7913	0.7849	0.7211	0.808	0.8055
CHEMBL4599	0.7487	0.7236	0.6743	0.8096	0.8119
CHEMBL4766	0.789	0.7576	0.7369	0.8333	0.8506
CHEMBL4835	0.8668	0.8674	0.8217	0.8903	0.9073
CHEMBL5491	0.8712	0.8733	0.7657	0.8797	0.8882
CHEMBL5543	0.7231	0.7004	0.6421	0.7597	0.7601
CHEMBL5620	0.8222	0.8146	0.8072	0.8444	0.8459
CHEMBL6164	0.7517	0.7479	0.7238	0.754	0.7901
CHEMBL1163101	0.6947	0.6762	0.5328	0.9044	0.9133
CHEMBL1293289	0.7422	0.7202	0.7559	0.7273	0.8216
CHEMBL2169736	0.7417	0.7294	0.6746	0.8017	0.8057
CHEMBL3638344	0.8672	0.8669	0.8813	0.8729	0.916
CHEMBL4296013	0.8185	0.8276	0.7107	0.8416	0.8635
CHEMBL249	0.7784	0.7539	0.7196	0.7886	0.7833
CHEMBL261	0.7859	0.784	0.774	0.8667	0.8695
CHEMBL274	0.8097	0.7957	0.7584	0.8113	0.8198
CHEMBL338	0.8113	0.7954	0.79	0.7937	0.8196
CHEMBL1871	0.784	0.7946	0.7509	0.8361	0.8678
CHEMBL1900	0.7925	0.7824	0.7382	0.8253	0.8258
CHEMBL1929	0.802	0.7956	0.779	0.8554	0.8635
CHEMBL2028	0.717	0.7316	0.6506	0.7333	0.7641
CHEMBL2207	0.7631	0.7443	0.7241	0.7323	0.7791
CHEMBL2439	0.787	0.781	0.7254	0.8277	0.818
CHEMBL2808	0.8127	0.8168	0.7023	0.8374	0.846
CHEMBL2820	0.8757	0.8569	0.8126	0.8694	0.8829
CHEMBL2993	0.8258	0.8305	0.791	0.8313	0.8528
CHEMBL3045	0.7588	0.7523	0.729	0.83	0.8316
CHEMBL3332	0.8137	0.7826	0.7453	0.8091	0.7953
CHEMBL3468	0.8211	0.8025	0.7885	0.8448	0.8275
CHEMBL3535	0.7004	0.7223	0.6059	0.8634	0.8683
CHEMBL3864	0.8236	0.8158	0.7235	0.8836	0.8986
CHEMBL3910	0.7838	0.7707	0.7697	0.7907	0.8005
CHEMBL4073	0.7891	0.7544	0.7379	0.8132	0.8237
CHEMBL4074	0.8093	0.8131	0.7982	0.8121	0.8348
CHEMBL4128	0.7844	0.7727	0.7444	0.789	0.8282
CHEMBL4662	0.8238	0.8232	0.7933	0.8419	0.8474
CHEMBL5147	0.7629	0.7601	0.7043	0.7533	0.7656
CHEMBL5192	0.7743	0.7442	0.7567	0.7937	0.8109
CHEMBL5408	0.7849	0.7949	0.6999	0.8694	0.8746
CHEMBL6115	0.8511	0.8481	0.8234	0.861	0.8888
CHEMBL298	0.826	0.7964	0.7749	0.81	0.8351
CHEMBL299	0.8143	0.8153	0.8028	0.8937	0.9065
CHEMBL339	0.7486	0.711	0.6834	0.8189	0.8262
CHEMBL1856	0.8917	0.8835	0.8102	0.8992	0.8903
CHEMBL2002	0.808	0.7866	0.6646	0.8292	0.8303
CHEMBL2996	0.8169	0.8234	0.7862	0.8173	0.8238
CHEMBL2998	0.8307	0.8492	0.8123	0.8308	0.8797
CHEMBL3066	0.8668	0.8526	0.8268	0.862	0.8639
CHEMBL3081	0.839	0.8327	0.8316	0.8484	0.8672
CHEMBL3476	0.7938	0.7673	0.716	0.8165	0.8323
CHEMBL3524	0.7951	0.7638	0.7496	0.872	0.8764
CHEMBL3691	0.8158	0.8095	0.7895	0.8081	0.8235
CHEMBL3891	0.7894	0.7855	0.7317	0.7927	0.7776
CHEMBL4102	0.7446	0.7262	0.7137	0.7709	0.7997
CHEMBL4117	0.6845	0.6547	0.6164	0.6682	0.6554
CHEMBL4303	0.8648	0.8492	0.8268	0.8766	0.8732
CHEMBL4481	0.7551	0.752	0.7248	0.7454	0.768
CHEMBL4506	0.8358	0.8268	0.7962	0.8512	0.8644
CHEMBL4696	0.741	0.7134	0.6721	0.7142	0.7076
CHEMBL4895	0.8317	0.8162	0.7982	0.8279	0.8472
CHEMBL4937	0.8386	0.8346	0.7984	0.8484	0.8438
CHEMBL5747	0.8344	0.8273	0.7828	0.8482	0.8613
CHEMBL6136	0.751	0.7225	0.7188	0.863	0.8648
CHEMBL1075138	0.7267	0.7135	0.6884	0.8298	0.8427
CHEMBL1921666	0.8308	0.8095	0.8214	0.8889	0.8813
CHEMBL2146302	0.8698	0.8586	0.855	0.8742	0.8966
CHEMBL2331053	0.6573	0.6595	0.5933	0.7228	0.7306
CHEMBL2366517	0.8128	0.8167	0.7732	0.8318	0.846
CHEMBL4523582	0.8104	0.802	0.7748	0.856	0.8629
CHEMBL241	0.7324	0.6692	0.6481	0.8038	0.7936
CHEMBL254	0.8379	0.8331	0.8108	0.8499	0.8519
CHEMBL1855	0.8818	0.8747	0.8337	0.8769	0.8751
CHEMBL1868	0.7454	0.7298	0.7175	0.8068	0.8376
CHEMBL2179	0.7011	0.6611	0.6521	0.7438	0.8464
CHEMBL2345	0.8208	0.8241	0.7748	0.8342	0.8502
CHEMBL2425	0.8485	0.832	0.773	0.8553	0.8351
CHEMBL2431	0.8248	0.8021	0.7873	0.8392	0.8412
CHEMBL2593	0.842	0.8431	0.7954	0.8424	0.8718
CHEMBL2622	0.8097	0.8083	0.782	0.8153	0.8478
CHEMBL2635	0.7193	0.7314	0.6864	0.7923	0.8195
CHEMBL2828	0.8576	0.8601	0.8554	0.8943	0.9018
CHEMBL2959	0.8021	0.7887	0.7604	0.8338	0.8389
CHEMBL3474	0.7815	0.7775	0.7604	0.8108	0.831
CHEMBL3475	0.7611	0.7416	0.7222	0.7474	0.7666
CHEMBL3514	0.8841	0.8784	0.8491	0.8799	0.8917
CHEMBL3529	0.8262	0.7938	0.743	0.9138	0.9221
CHEMBL3855	0.8596	0.8519	0.8247	0.8551	0.8543
CHEMBL3869	0.7964	0.8028	0.7965	0.8373	0.8438
CHEMBL3920	0.8335	0.8338	0.816	0.8415	0.8553
CHEMBL4068	0.8012	0.7929	0.7374	0.8033	0.8035
CHEMBL4093	0.7658	0.7726	0.6834	0.8154	0.8124
CHEMBL4508	0.8747	0.866	0.8769	0.873	0.8795
CHEMBL4681	0.7726	0.7855	0.7523	0.7879	0.8013
CHEMBL4683	0.7974	0.7958	0.673	0.9164	0.9147
CHEMBL4860	0.8611	0.8614	0.8118	0.858	0.8602
CHEMBL5366	0.8127	0.8072	0.7514	0.9076	0.9143
CHEMBL5979	0.7016	0.7115	0.5923	0.8142	0.8469
CHEMBL6135	0.8573	0.8437	0.626	0.8499	0.8652
CHEMBL208	0.7954	0.8024	0.7727	0.8425	0.8511
CHEMBL209	0.8065	0.7939	0.7881	0.8763	0.8684
CHEMBL252	0.8234	0.8104	0.7477	0.8108	0.8174
CHEMBL1808	0.8146	0.8033	0.7857	0.8315	0.849
CHEMBL1809	0.8822	0.8621	0.7739	0.8922	0.8788
CHEMBL1853	0.7765	0.7788	0.6253	0.8393	0.8315
CHEMBL1926	0.835	0.8332	0.781	0.8353	0.8427
CHEMBL1955	0.7515	0.7277	0.7045	0.7659	0.7567
CHEMBL2051	0.7628	0.7621	0.7243	0.7387	0.7657
CHEMBL2252	0.8262	0.8178	0.8076	0.825	0.8475
CHEMBL2285	0.8167	0.8143	0.7803	0.8306	0.8316
CHEMBL2508	0.8023	0.7825	0.761	0.8065	0.7851
CHEMBL2534	0.8648	0.8627	0.8321	0.8659	0.8749
CHEMBL3116	0.7584	0.7518	0.7229	0.7694	0.801
CHEMBL3710	0.7772	0.7533	0.7022	0.8207	0.8272
CHEMBL3776	0.4874	0.4715	0.5293	0.8675	0.8716
CHEMBL3922	0.8307	0.827	0.813	0.8281	0.8369
CHEMBL3979	0.7971	0.8008	0.7945	0.8826	0.8906
CHEMBL4321	0.8507	0.8371	0.751	0.9131	0.9108
CHEMBL4718	0.7735	0.7743	0.7317	0.8593	0.8436
CHEMBL4780	0.8165	0.818	0.7943	0.8199	0.8316
CHEMBL4804	0.8028	0.7907	0.7772	0.8068	0.8076
CHEMBL5407	0.785	0.7778	0.794	0.7726	0.807
CHEMBL6140	0.8699	0.8578	0.8549	0.8587	0.8628
CHEMBL6154	0.7543	0.7469	0.736	0.758	0.7896
CHEMBL1293244	0.7606	0.739	0.7116	0.7876	0.7918
CHEMBL1741186	0.7747	0.7685	0.7499	0.775	0.8024
CHEMBL1795116	0.8203	0.8048	0.7774	0.8469	0.8306
CHEMBL222	0.7701	0.7592	0.7176	0.7525	0.7751
CHEMBL236	0.8243	0.7937	0.7534	0.8556	0.8563
CHEMBL1947	0.9037	0.8941	0.872	0.9037	0.9168
CHEMBL1980	0.6781	0.7274	0.7122	0.8511	0.8515
CHEMBL1981	0.844	0.8153	0.8058	0.8784	0.8972
CHEMBL1994	0.6912	0.6818	0.616	0.751	0.7781
CHEMBL2127	0.7803	0.79	0.7784	0.7975	0.8045
CHEMBL2292	0.783	0.7725	0.7615	0.8058	0.8252
CHEMBL2318	0.8332	0.8118	0.7784	0.846	0.8536
CHEMBL2335	0.8113	0.8084	0.7819	0.8099	0.832
CHEMBL2527	0.8467	0.8335	0.8216	0.8424	0.8558
CHEMBL2871	0.742	0.7409	0.6281	0.7681	0.786
CHEMBL3229	0.7431	0.7387	0.74	0.7676	0.7703
CHEMBL3238	0.7045	0.708	0.6113	0.7796	0.7821
CHEMBL3563	0.7972	0.7778	0.7565	0.8026	0.8232
CHEMBL3577	0.8028	0.809	0.7663	0.8057	0.8217
CHEMBL3589	0.8207	0.8042	0.7705	0.8568	0.8703
CHEMBL3629	0.8631	0.8521	0.7831	0.8753	0.8827
CHEMBL4026	0.7894	0.7793	0.7524	0.7961	0.8
CHEMBL4036	0.7266	0.6935	0.6435	0.8363	0.8416
CHEMBL4191	0.8289	0.8218	0.7998	0.8341	0.8581
CHEMBL4393	0.831	0.8301	0.7878	0.8568	0.8684
CHEMBL4581	0.8061	0.8114	0.7908	0.8098	0.8421
CHEMBL4618	0.7438	0.7365	0.6882	0.7457	0.7592
CHEMBL4803	0.7341	0.7234	0.7283	0.741	0.7613
CHEMBL5077	0.8676	0.8745	0.8409	0.8891	0.8879
CHEMBL5314	0.8081	0.7865	0.7478	0.8115	0.8231
CHEMBL5462	0.8799	0.8768	0.8306	0.8869	0.8875
CHEMBL1075145	0.681	0.6424	0.5912	0.6873	0.7444
CHEMBL1795177	0.7752	0.7688	0.7324	0.7687	0.7734
CHEMBL3988596	0.8457	0.8553	0.8265	0.8536	0.8669
CHEMBL224	0.762	0.7703	0.6839	0.8035	0.8136
CHEMBL227	0.8528	0.8503	0.7896	0.8631	0.8665
CHEMBL233	0.7912	0.7597	0.702	0.8293	0.827
CHEMBL1825	0.7938	0.8011	0.7399	0.8095	0.8082
CHEMBL1944	0.8046	0.8239	0.7758	0.8529	0.8589
CHEMBL1952	0.7962	0.804	0.7495	0.8035	0.8488
CHEMBL1978	0.7814	0.775	0.7669	0.7968	0.8103
CHEMBL2041	0.7401	0.7325	0.7061	0.766	0.7787
CHEMBL2108	0.8082	0.793	0.7883	0.8051	0.7993
CHEMBL2243	0.8169	0.8139	0.8098	0.8315	0.8479
CHEMBL2334	0.8646	0.8564	0.8337	0.8611	0.8725
CHEMBL2487	0.8449	0.8337	0.7901	0.855	0.8612
CHEMBL2525	0.8274	0.8267	0.8057	0.8212	0.8482
CHEMBL2652	0.8694	0.8559	0.8106	0.8732	0.8905
CHEMBL2730	0.7995	0.7929	0.7663	0.8153	0.8094
CHEMBL2903	0.6754	0.6662	0.6739	0.8203	0.8229
CHEMBL3202	0.7813	0.7284	0.7129	0.8335	0.8394
CHEMBL4550	0.8578	0.85	0.7678	0.852	0.8526
CHEMBL4578	0.8389	0.86	0.8116	0.8488	0.8652
CHEMBL4625	0.8677	0.85	0.812	0.8889	0.9014
CHEMBL4801	0.8613	0.8476	0.8242	0.8843	0.8938
CHEMBL5103	0.8016	0.7901	0.72	0.8246	0.8234
CHEMBL6032	0.7769	0.774	0.7459	0.7858	0.7861
CHEMBL1293257	0.7385	0.7319	0.6707	0.742	0.7494
CHEMBL1293269	0.7971	0.7887	0.7647	0.79	0.8103
CHEMBL2189121	0.867	0.8563	0.6091	0.8857	0.8889

## Sheet: F1_2
Dataset	RF	XGB	CP	ΔCL	DΔC
CHEMBL4561	0.7343	0.7431	0.6836	0.7454	0.7385
CHEMBL202	0.8095	0.7952	0.7378	0.8383	0.8488
CHEMBL217	0.7856	0.7717	0.7547	0.8491	0.8481
CHEMBL228	0.8142	0.8124	0.7878	0.8406	0.8398
CHEMBL1785	0.8626	0.8572	0.8091	0.8654	0.8849
CHEMBL1792	0.7364	0.7486	0.7803	0.86	0.8841
CHEMBL1801	0.7055	0.7012	0.6422	0.8214	0.8344
CHEMBL1806	0.7169	0.7142	0.7733	0.8447	0.8565
CHEMBL1966	0.8059	0.7869	0.7919	0.8484	0.8713
CHEMBL2716	0.7369	0.7129	0.6654	0.8375	0.8232
CHEMBL2850	0.7923	0.7598	0.7586	0.8164	0.8168
CHEMBL3024	0.8528	0.8485	0.8046	0.883	0.9038
CHEMBL3234	0.7645	0.7463	0.7337	0.7753	0.8056
CHEMBL3369	0.7191	0.7192	0.6744	0.7298	0.7303
CHEMBL3568	0.8178	0.8136	0.8059	0.8094	0.8267
CHEMBL3582	0.782	0.776	0.6245	0.7844	0.8117
CHEMBL3807	0.855	0.8491	0.7788	0.8812	0.8905
CHEMBL4204	0.8675	0.8723	0.839	0.8667	0.8617
CHEMBL4372	0.7809	0.7558	0.6727	0.8294	0.8168
CHEMBL4588	0.8385	0.835	0.805	0.8486	0.8721
CHEMBL5080	0.8608	0.8461	0.8488	0.8626	0.8564
CHEMBL5285	0.8588	0.8511	0.7986	0.8758	0.8722
CHEMBL5331	0.7948	0.7873	0.7261	0.7997	0.8013
CHEMBL5469	0.59	0.6611	0.7374	0.8719	0.8858
CHEMBL5697	0.8227	0.8148	0.7905	0.8388	0.8563
CHEMBL1250348	0.7808	0.7296	0.7351	0.8517	0.8845
CHEMBL1293311	0.6276	0.6123	0.5588	0.5865	0.6192
CHEMBL1795186	0.6805	0.6817	0.7235	0.6905	0.8264
CHEMBL2189110	0.7784	0.7694	0.7097	0.7803	0.7873
CHEMBL2216739	0.8385	0.8223	0.8221	0.8185	0.8187
CHEMBL3988599	0.8003	0.7721	0.7719	0.7806	0.7799
CHEMBL205	0.8549	0.8494	0.7965	0.8632	0.8796
CHEMBL238	0.8352	0.8221	0.8157	0.8473	0.8728
CHEMBL239	0.7347	0.7199	0.7251	0.7867	0.7963
CHEMBL288	0.8478	0.8336	0.7789	0.8586	0.8626
CHEMBL1781	0.7959	0.7887	0.7841	0.8434	0.8608
CHEMBL1917	0.7618	0.7733	0.6697	0.8288	0.8515
CHEMBL2007	0.7553	0.7476	0.7016	0.8027	0.7961
CHEMBL2563	0.763	0.7374	0.6229	0.8468	0.8389
CHEMBL3286	0.7798	0.7863	0.7488	0.8288	0.8535
CHEMBL3587	0.8107	0.8003	0.7723	0.8366	0.8559
CHEMBL3721	0.6197	0.5971	0.5813	0.7345	0.7757
CHEMBL3746	0.6385	0.6037	0.5015	0.7244	0.7743
CHEMBL4015	0.8023	0.785	0.7908	0.8102	0.8216
CHEMBL4072	0.7813	0.7539	0.7636	0.8398	0.8597
CHEMBL4161	0.8377	0.8193	0.768	0.8224	0.8148
CHEMBL4439	0.8251	0.8214	0.7749	0.8315	0.8382
CHEMBL4462	0.7913	0.7849	0.7211	0.808	0.8066
CHEMBL4599	0.7487	0.7236	0.6743	0.8091	0.8129
CHEMBL4766	0.789	0.7576	0.7369	0.8347	0.851
CHEMBL4835	0.8668	0.8674	0.8217	0.8904	0.9072
CHEMBL5491	0.8712	0.8733	0.7657	0.8794	0.8878
CHEMBL5543	0.7231	0.7004	0.6421	0.7589	0.7549
CHEMBL5620	0.8221	0.8146	0.8072	0.8448	0.8461
CHEMBL6164	0.7516	0.7478	0.7238	0.7538	0.7896
CHEMBL1163101	0.6945	0.6758	0.5328	0.904	0.9133
CHEMBL1293289	0.7421	0.72	0.7559	0.7284	0.8231
CHEMBL2169736	0.7417	0.7294	0.6746	0.8021	0.806
CHEMBL3638344	0.8672	0.8669	0.8813	0.8727	0.9161
CHEMBL4296013	0.8184	0.8276	0.7107	0.8412	0.8638
CHEMBL249	0.7783	0.7537	0.7196	0.7887	0.783
CHEMBL261	0.7859	0.7839	0.774	0.8672	0.8695
CHEMBL274	0.8097	0.7956	0.7584	0.8125	0.8196
CHEMBL338	0.8113	0.7953	0.79	0.7933	0.8202
CHEMBL1871	0.7839	0.7945	0.7509	0.8365	0.8687
CHEMBL1900	0.7924	0.7822	0.7382	0.8261	0.8261
CHEMBL1929	0.802	0.7956	0.779	0.8553	0.8634
CHEMBL2028	0.7166	0.7312	0.6506	0.7341	0.7653
CHEMBL2207	0.763	0.7442	0.7241	0.7344	0.7772
CHEMBL2439	0.787	0.781	0.7254	0.8282	0.8189
CHEMBL2808	0.8127	0.8168	0.7023	0.8374	0.8463
CHEMBL2820	0.8757	0.8569	0.8126	0.8692	0.8838
CHEMBL2993	0.8258	0.8305	0.791	0.8312	0.8534
CHEMBL3045	0.7587	0.7522	0.729	0.83	0.8304
CHEMBL3332	0.8137	0.7825	0.7453	0.8086	0.7952
CHEMBL3468	0.8211	0.8024	0.7885	0.8445	0.8286
CHEMBL3535	0.7004	0.7223	0.6059	0.8636	0.8679
CHEMBL3864	0.8236	0.8158	0.7235	0.884	0.8984
CHEMBL3910	0.7838	0.7706	0.7697	0.7912	0.801
CHEMBL4073	0.789	0.7543	0.7379	0.8136	0.8233
CHEMBL4074	0.8093	0.813	0.7982	0.8124	0.8345
CHEMBL4128	0.7844	0.7727	0.7444	0.7889	0.8283
CHEMBL4662	0.8238	0.8232	0.7933	0.8418	0.8469
CHEMBL5147	0.7629	0.7601	0.7043	0.7524	0.7647
CHEMBL5192	0.7743	0.7442	0.7567	0.7931	0.8105
CHEMBL5408	0.7849	0.7948	0.6999	0.8697	0.8744
CHEMBL6115	0.8511	0.8481	0.8234	0.8616	0.8895
CHEMBL298	0.8259	0.7962	0.7749	0.8093	0.8379
CHEMBL299	0.8143	0.8153	0.8028	0.8936	0.9066
CHEMBL339	0.7485	0.711	0.6834	0.819	0.8266
CHEMBL1856	0.8916	0.8835	0.8102	0.8996	0.8905
CHEMBL2002	0.808	0.7866	0.6646	0.8299	0.8298
CHEMBL2996	0.8169	0.8234	0.7862	0.8164	0.8239
CHEMBL2998	0.8307	0.8492	0.8123	0.83	0.8796
CHEMBL3066	0.8668	0.8526	0.8268	0.8618	0.8633
CHEMBL3081	0.839	0.8327	0.8316	0.8477	0.867
CHEMBL3476	0.7938	0.7673	0.716	0.8161	0.8317
CHEMBL3524	0.795	0.7637	0.7496	0.8714	0.8765
CHEMBL3691	0.8158	0.8094	0.7895	0.8076	0.824
CHEMBL3891	0.7894	0.7853	0.7317	0.7941	0.7773
CHEMBL4102	0.7446	0.7262	0.7137	0.7717	0.8
CHEMBL4117	0.6845	0.6547	0.6164	0.6682	0.6546
CHEMBL4303	0.8648	0.8492	0.8268	0.877	0.8726
CHEMBL4481	0.755	0.7519	0.7248	0.7452	0.7685
CHEMBL4506	0.8358	0.8268	0.7962	0.8516	0.8636
CHEMBL4696	0.741	0.7134	0.6721	0.7147	0.7084
CHEMBL4895	0.8317	0.8162	0.7982	0.8281	0.8471
CHEMBL4937	0.8386	0.8346	0.7984	0.8474	0.8441
CHEMBL5747	0.8344	0.8272	0.7828	0.8477	0.8603
CHEMBL6136	0.751	0.7225	0.7188	0.8633	0.8651
CHEMBL1075138	0.7267	0.7135	0.6884	0.8312	0.8441
CHEMBL1921666	0.8308	0.8095	0.8214	0.8889	0.8812
CHEMBL2146302	0.8698	0.8586	0.855	0.8744	0.8969
CHEMBL2331053	0.6543	0.6589	0.5933	0.7194	0.7285
CHEMBL2366517	0.8128	0.8167	0.7732	0.8315	0.8462
CHEMBL4523582	0.8104	0.8019	0.7748	0.8553	0.8631
CHEMBL241	0.7324	0.6691	0.6481	0.8042	0.7954
CHEMBL254	0.8379	0.833	0.8108	0.8503	0.852
CHEMBL1855	0.8818	0.8747	0.8337	0.8768	0.8758
CHEMBL1868	0.7454	0.7298	0.7175	0.8074	0.8373
CHEMBL2179	0.7007	0.6605	0.6521	0.7441	0.8468
CHEMBL2345	0.8208	0.8241	0.7748	0.8349	0.8505
CHEMBL2425	0.8485	0.832	0.773	0.8551	0.8359
CHEMBL2431	0.8247	0.8021	0.7873	0.8396	0.8405
CHEMBL2593	0.8419	0.8431	0.7954	0.8422	0.8709
CHEMBL2622	0.8097	0.8083	0.782	0.815	0.8483
CHEMBL2635	0.7192	0.7313	0.6864	0.7926	0.8213
CHEMBL2828	0.8576	0.8601	0.8554	0.8943	0.9019
CHEMBL2959	0.8021	0.7886	0.7604	0.8338	0.8394
CHEMBL3474	0.7813	0.7773	0.7604	0.8118	0.8311
CHEMBL3475	0.7611	0.7415	0.7222	0.7489	0.7663
CHEMBL3514	0.8841	0.8783	0.8491	0.88	0.8918
CHEMBL3529	0.8262	0.7938	0.743	0.9139	0.922
CHEMBL3855	0.8595	0.8519	0.8247	0.8541	0.8551
CHEMBL3869	0.7964	0.8028	0.7965	0.8369	0.8444
CHEMBL3920	0.8335	0.8338	0.816	0.8414	0.8551
CHEMBL4068	0.8012	0.7929	0.7374	0.8028	0.8025
CHEMBL4093	0.7658	0.7726	0.6834	0.8159	0.8109
CHEMBL4508	0.8747	0.866	0.8769	0.8735	0.8806
CHEMBL4681	0.7725	0.7854	0.7523	0.7893	0.7999
CHEMBL4683	0.7974	0.7957	0.673	0.9164	0.9147
CHEMBL4860	0.8611	0.8613	0.8118	0.8577	0.8606
CHEMBL5366	0.8127	0.8071	0.7514	0.9081	0.9146
CHEMBL5979	0.7016	0.7115	0.5923	0.8159	0.8463
CHEMBL6135	0.8572	0.8436	0.626	0.8503	0.865
CHEMBL208	0.7954	0.8024	0.7727	0.8421	0.8508
CHEMBL209	0.8065	0.7939	0.7881	0.8761	0.8684
CHEMBL252	0.8234	0.8104	0.7477	0.8103	0.8174
CHEMBL1808	0.8146	0.8033	0.7857	0.8326	0.8478
CHEMBL1809	0.8822	0.8621	0.7739	0.8924	0.8786
CHEMBL1853	0.7761	0.7784	0.6253	0.8397	0.831
CHEMBL1926	0.835	0.8332	0.781	0.8356	0.8427
CHEMBL1955	0.7514	0.7276	0.7045	0.7673	0.7586
CHEMBL2051	0.7628	0.762	0.7243	0.7368	0.7653
CHEMBL2252	0.8262	0.8178	0.8076	0.8252	0.8482
CHEMBL2285	0.8167	0.8143	0.7803	0.8311	0.8316
CHEMBL2508	0.8023	0.7825	0.761	0.8064	0.7837
CHEMBL2534	0.8648	0.8627	0.8321	0.8656	0.8743
CHEMBL3116	0.7584	0.7518	0.7229	0.7699	0.8002
CHEMBL3710	0.7772	0.7533	0.7022	0.8208	0.8253
CHEMBL3776	0.4874	0.4715	0.5293	0.8667	0.8719
CHEMBL3922	0.8307	0.8269	0.813	0.8278	0.8361
CHEMBL3979	0.7971	0.8008	0.7945	0.8831	0.8906
CHEMBL4321	0.8507	0.8371	0.751	0.913	0.9101
CHEMBL4718	0.7735	0.7743	0.7317	0.8597	0.8422
CHEMBL4780	0.8165	0.818	0.7943	0.8194	0.8314
CHEMBL4804	0.8028	0.7907	0.7772	0.8077	0.8081
CHEMBL5407	0.785	0.7778	0.794	0.7727	0.8063
CHEMBL6140	0.8699	0.8578	0.8549	0.859	0.8627
CHEMBL6154	0.7542	0.7468	0.736	0.7581	0.791
CHEMBL1293244	0.7605	0.7389	0.7116	0.7878	0.7915
CHEMBL1741186	0.7747	0.7684	0.7499	0.7763	0.803
CHEMBL1795116	0.8203	0.8048	0.7774	0.8452	0.8307
CHEMBL222	0.7699	0.759	0.7176	0.7526	0.7755
CHEMBL236	0.8243	0.7936	0.7534	0.8552	0.8567
CHEMBL1947	0.9036	0.894	0.872	0.9035	0.9172
CHEMBL1980	0.6781	0.7274	0.7122	0.8508	0.8508
CHEMBL1981	0.844	0.8153	0.8058	0.8788	0.8974
CHEMBL1994	0.6912	0.6818	0.616	0.7515	0.7788
CHEMBL2127	0.7803	0.79	0.7784	0.7985	0.8053
CHEMBL2292	0.783	0.7725	0.7615	0.8064	0.8252
CHEMBL2318	0.8332	0.8118	0.7784	0.8448	0.8525
CHEMBL2335	0.8113	0.8084	0.7819	0.809	0.833
CHEMBL2527	0.8467	0.8335	0.8216	0.8433	0.856
CHEMBL2871	0.7419	0.7408	0.6281	0.7698	0.7861
CHEMBL3229	0.7431	0.7387	0.74	0.7676	0.7687
CHEMBL3238	0.7045	0.7079	0.6113	0.7795	0.7819
CHEMBL3563	0.7971	0.7777	0.7565	0.8014	0.8241
CHEMBL3577	0.8028	0.8089	0.7663	0.8067	0.8213
CHEMBL3589	0.8207	0.8042	0.7705	0.8567	0.8711
CHEMBL3629	0.8631	0.852	0.7831	0.8751	0.8835
CHEMBL4026	0.7894	0.7793	0.7524	0.7948	0.802
CHEMBL4036	0.7266	0.6935	0.6435	0.8363	0.8408
CHEMBL4191	0.8289	0.8218	0.7998	0.8347	0.8571
CHEMBL4393	0.8309	0.83	0.7878	0.8568	0.8683
CHEMBL4581	0.8061	0.8114	0.7908	0.8097	0.8423
CHEMBL4618	0.7437	0.7363	0.6882	0.7469	0.7597
CHEMBL4803	0.7341	0.7234	0.7283	0.7415	0.7618
CHEMBL5077	0.8675	0.8744	0.8409	0.8893	0.8882
CHEMBL5314	0.808	0.7864	0.7478	0.8121	0.8243
CHEMBL5462	0.8798	0.8767	0.8306	0.8866	0.8875
CHEMBL1075145	0.681	0.6423	0.5912	0.685	0.7426
CHEMBL1795177	0.7752	0.7688	0.7324	0.7677	0.7728
CHEMBL3988596	0.8457	0.8553	0.8265	0.8542	0.8669
CHEMBL224	0.762	0.7703	0.6839	0.8025	0.8134
CHEMBL227	0.8527	0.8503	0.7896	0.8623	0.8663
CHEMBL233	0.7911	0.7595	0.702	0.8282	0.8278
CHEMBL1825	0.7938	0.8011	0.7399	0.8097	0.807
CHEMBL1944	0.8046	0.8238	0.7758	0.8526	0.8581
CHEMBL1952	0.7962	0.804	0.7495	0.8031	0.8493
CHEMBL1978	0.7814	0.775	0.7669	0.7962	0.8102
CHEMBL2041	0.7401	0.7325	0.7061	0.7653	0.7785
CHEMBL2108	0.8082	0.793	0.7883	0.8044	0.8017
CHEMBL2243	0.8169	0.8139	0.8098	0.8311	0.8479
CHEMBL2334	0.8646	0.8564	0.8337	0.8609	0.8726
CHEMBL2487	0.8449	0.8336	0.7901	0.8553	0.8613
CHEMBL2525	0.8274	0.8267	0.8057	0.8212	0.848
CHEMBL2652	0.8694	0.8559	0.8106	0.8722	0.8902
CHEMBL2730	0.7995	0.7928	0.7663	0.8156	0.8101
CHEMBL2903	0.6754	0.6661	0.6739	0.8206	0.8216
CHEMBL3202	0.7812	0.7283	0.7129	0.8333	0.8398
CHEMBL4550	0.8578	0.8499	0.7678	0.8522	0.8525
CHEMBL4578	0.8389	0.86	0.8116	0.8487	0.8653
CHEMBL4625	0.8677	0.85	0.812	0.8888	0.901
CHEMBL4801	0.8613	0.8475	0.8242	0.8843	0.8935
CHEMBL5103	0.8016	0.7901	0.72	0.8254	0.8233
CHEMBL6032	0.7769	0.774	0.7459	0.7855	0.7852
CHEMBL1293257	0.7384	0.7318	0.6707	0.7419	0.7469
CHEMBL1293269	0.7971	0.7887	0.7647	0.7903	0.8111
CHEMBL2189121	0.867	0.8562	0.6091	0.8857	0.8881

## Sheet: AUC_2
Dataset	RF	XGB	CP	ΔCL	DΔC
CHEMBL4561	0.8072	0.8102	0.7531	0.8223	0.8088
CHEMBL202	0.8907	0.8715	0.8068	0.9171	0.9211
CHEMBL217	0.8759	0.8557	0.8369	0.9222	0.9179
CHEMBL228	0.8997	0.8927	0.8687	0.9237	0.9151
CHEMBL1785	0.9393	0.9354	0.8982	0.9408	0.9528
CHEMBL1792	0.8418	0.8479	0.8758	0.9412	0.9582
CHEMBL1801	0.7785	0.7283	0.7243	0.9012	0.9159
CHEMBL1806	0.7854	0.7769	0.8535	0.9174	0.93
CHEMBL1966	0.891	0.8706	0.8732	0.9262	0.9361
CHEMBL2716	0.8234	0.7906	0.7178	0.9129	0.9032
CHEMBL2850	0.8698	0.8433	0.8372	0.8909	0.8953
CHEMBL3024	0.9336	0.9268	0.8929	0.9521	0.9626
CHEMBL3234	0.8442	0.8224	0.8073	0.8553	0.8799
CHEMBL3369	0.7953	0.7801	0.7366	0.8089	0.8038
CHEMBL3568	0.9046	0.8995	0.8892	0.8943	0.9074
CHEMBL3582	0.867	0.8625	0.6654	0.864	0.8885
CHEMBL3807	0.9338	0.915	0.8648	0.9503	0.9579
CHEMBL4204	0.9416	0.9417	0.9198	0.9399	0.9311
CHEMBL4372	0.8526	0.8311	0.7364	0.8976	0.8987
CHEMBL4588	0.9122	0.9047	0.8845	0.9215	0.934
CHEMBL5080	0.9406	0.9189	0.9272	0.937	0.9363
CHEMBL5285	0.936	0.9339	0.8774	0.9466	0.9464
CHEMBL5331	0.8742	0.8647	0.8087	0.8797	0.8737
CHEMBL5469	0.6142	0.6935	0.794	0.9502	0.9553
CHEMBL5697	0.8964	0.8838	0.8622	0.9141	0.9249
CHEMBL1250348	0.8652	0.8053	0.8311	0.9247	0.9402
CHEMBL1293311	0.6693	0.6594	0.5855	0.6337	0.6754
CHEMBL1795186	0.7167	0.7194	0.8029	0.7225	0.8934
CHEMBL2189110	0.8586	0.8503	0.7845	0.8628	0.8713
CHEMBL2216739	0.9257	0.9085	0.9024	0.9072	0.8932
CHEMBL3988599	0.8825	0.8505	0.848	0.8548	0.8517
CHEMBL205	0.9103	0.8908	0.8682	0.9381	0.9424
CHEMBL238	0.9165	0.9044	0.901	0.9264	0.9432
CHEMBL239	0.8062	0.7891	0.796	0.8687	0.8676
CHEMBL288	0.9279	0.9158	0.8683	0.9348	0.9363
CHEMBL1781	0.8852	0.878	0.8655	0.9213	0.9365
CHEMBL1917	0.8248	0.8362	0.7286	0.9121	0.9225
CHEMBL2007	0.844	0.8267	0.7741	0.8814	0.8738
CHEMBL2563	0.8382	0.8129	0.6698	0.9201	0.9121
CHEMBL3286	0.8649	0.8737	0.8197	0.9126	0.9332
CHEMBL3587	0.892	0.8755	0.8456	0.9185	0.9266
CHEMBL3721	0.6946	0.6594	0.6064	0.8056	0.8518
CHEMBL3746	0.6912	0.6503	0.5182	0.791	0.8511
CHEMBL4015	0.8871	0.8649	0.8756	0.8909	0.8936
CHEMBL4072	0.8668	0.8321	0.8443	0.9209	0.9291
CHEMBL4161	0.9043	0.8853	0.8472	0.8976	0.8952
CHEMBL4439	0.9069	0.9039	0.8575	0.91	0.9209
CHEMBL4462	0.872	0.8637	0.796	0.888	0.8843
CHEMBL4599	0.8201	0.7909	0.7622	0.8906	0.8856
CHEMBL4766	0.8731	0.8283	0.8194	0.9127	0.9206
CHEMBL4835	0.9413	0.9438	0.9186	0.961	0.9696
CHEMBL5491	0.9515	0.9436	0.8642	0.9518	0.9578
CHEMBL5543	0.7875	0.7548	0.7028	0.8454	0.8459
CHEMBL5620	0.9101	0.9037	0.8939	0.9204	0.9263
CHEMBL6164	0.83	0.8277	0.8056	0.8341	0.8689
CHEMBL1163101	0.7627	0.7458	0.5272	0.958	0.9683
CHEMBL1293289	0.8144	0.7953	0.8368	0.7848	0.8986
CHEMBL2169736	0.8229	0.8071	0.7561	0.8809	0.8787
CHEMBL3638344	0.9534	0.9518	0.9595	0.9494	0.9746
CHEMBL4296013	0.8958	0.9043	0.7868	0.9207	0.9319
CHEMBL249	0.8534	0.834	0.7904	0.8677	0.8582
CHEMBL261	0.8846	0.8815	0.8701	0.9409	0.9371
CHEMBL274	0.8944	0.8767	0.8454	0.8968	0.8995
CHEMBL338	0.8897	0.8734	0.8669	0.8707	0.9009
CHEMBL1871	0.863	0.8728	0.8366	0.9149	0.9437
CHEMBL1900	0.8724	0.8598	0.8257	0.9079	0.9067
CHEMBL1929	0.8913	0.8798	0.8683	0.9309	0.9304
CHEMBL2028	0.799	0.7987	0.7244	0.8057	0.8448
CHEMBL2207	0.8315	0.8126	0.802	0.7993	0.8502
CHEMBL2439	0.8854	0.8697	0.8098	0.9134	0.8983
CHEMBL2808	0.8948	0.8959	0.7891	0.9172	0.9296
CHEMBL2820	0.9483	0.9318	0.8878	0.9426	0.9476
CHEMBL2993	0.9069	0.9138	0.8726	0.9099	0.9275
CHEMBL3045	0.8538	0.8425	0.8094	0.903	0.9033
CHEMBL3332	0.9033	0.8767	0.8437	0.8897	0.8805
CHEMBL3468	0.9049	0.8853	0.8738	0.9173	0.9126
CHEMBL3535	0.7583	0.791	0.615	0.9425	0.9478
CHEMBL3864	0.912	0.9028	0.8151	0.9505	0.9612
CHEMBL3910	0.8681	0.8524	0.8507	0.8715	0.8798
CHEMBL4073	0.8694	0.8346	0.8206	0.8941	0.913
CHEMBL4074	0.8987	0.8999	0.8814	0.8946	0.9085
CHEMBL4128	0.8637	0.8482	0.8245	0.8705	0.9043
CHEMBL4662	0.9064	0.9041	0.8822	0.9219	0.9192
CHEMBL5147	0.8413	0.8328	0.7822	0.8332	0.8421
CHEMBL5192	0.8612	0.8305	0.841	0.8756	0.8953
CHEMBL5408	0.8733	0.8741	0.7628	0.9451	0.9472
CHEMBL6115	0.9277	0.9229	0.9031	0.937	0.9471
CHEMBL298	0.9167	0.8845	0.8736	0.9068	0.9206
CHEMBL299	0.9023	0.9035	0.8982	0.961	0.9626
CHEMBL339	0.8316	0.7838	0.7449	0.8982	0.9
CHEMBL1856	0.9556	0.9466	0.8872	0.9601	0.9566
CHEMBL2002	0.8953	0.8692	0.7194	0.9202	0.9089
CHEMBL2996	0.8977	0.9019	0.8728	0.9014	0.9019
CHEMBL2998	0.908	0.9246	0.895	0.9136	0.9421
CHEMBL3066	0.9448	0.9353	0.9122	0.935	0.9424
CHEMBL3081	0.9153	0.9111	0.9123	0.924	0.9427
CHEMBL3476	0.8742	0.8456	0.7865	0.8975	0.9049
CHEMBL3524	0.8818	0.842	0.8269	0.9417	0.9412
CHEMBL3691	0.8911	0.8872	0.8745	0.8882	0.8969
CHEMBL3891	0.8674	0.8633	0.8055	0.8752	0.8603
CHEMBL4102	0.816	0.7917	0.7839	0.8455	0.8681
CHEMBL4117	0.7527	0.7255	0.6845	0.7281	0.717
CHEMBL4303	0.936	0.9232	0.9145	0.942	0.9427
CHEMBL4481	0.833	0.8219	0.7985	0.8208	0.8415
CHEMBL4506	0.9001	0.9002	0.8687	0.9304	0.932
CHEMBL4696	0.806	0.7913	0.7472	0.7898	0.7819
CHEMBL4895	0.9124	0.8946	0.8791	0.9088	0.9193
CHEMBL4937	0.9188	0.9153	0.8882	0.9243	0.9253
CHEMBL5747	0.9115	0.9035	0.8685	0.9235	0.9327
CHEMBL6136	0.8177	0.7748	0.7816	0.9369	0.9314
CHEMBL1075138	0.8264	0.7963	0.7766	0.9127	0.9215
CHEMBL1921666	0.928	0.9086	0.9114	0.954	0.9483
CHEMBL2146302	0.9429	0.9367	0.9308	0.948	0.9572
CHEMBL2331053	0.7359	0.7293	0.6536	0.8044	0.8084
CHEMBL2366517	0.8978	0.9001	0.8613	0.9182	0.9297
CHEMBL4523582	0.8926	0.8826	0.8552	0.929	0.9306
CHEMBL241	0.8126	0.7563	0.7194	0.882	0.878
CHEMBL254	0.9162	0.9126	0.891	0.9272	0.9276
CHEMBL1855	0.9562	0.9484	0.9262	0.947	0.9494
CHEMBL1868	0.8315	0.8183	0.8049	0.8911	0.9125
CHEMBL2179	0.7742	0.7245	0.6881	0.8171	0.9211
CHEMBL2345	0.902	0.8978	0.857	0.9132	0.9207
CHEMBL2425	0.9297	0.9111	0.8533	0.9306	0.9153
CHEMBL2431	0.9022	0.88	0.8695	0.9156	0.9154
CHEMBL2593	0.9249	0.9268	0.8911	0.9215	0.9401
CHEMBL2622	0.8941	0.8882	0.8648	0.897	0.9137
CHEMBL2635	0.7965	0.7998	0.7559	0.8696	0.8812
CHEMBL2828	0.9442	0.9409	0.9383	0.9643	0.966
CHEMBL2959	0.8858	0.8714	0.8425	0.9118	0.915
CHEMBL3474	0.8604	0.844	0.8388	0.8904	0.9119
CHEMBL3475	0.8146	0.8004	0.7745	0.8124	0.8365
CHEMBL3514	0.9513	0.9514	0.9296	0.9527	0.9589
CHEMBL3529	0.9102	0.8727	0.8316	0.9739	0.9773
CHEMBL3855	0.9448	0.9407	0.9197	0.932	0.9364
CHEMBL3869	0.8895	0.8894	0.883	0.9199	0.9181
CHEMBL3920	0.9149	0.9134	0.9019	0.9198	0.9284
CHEMBL4068	0.8845	0.8732	0.8211	0.8874	0.8833
CHEMBL4093	0.8453	0.8551	0.7489	0.9009	0.8942
CHEMBL4508	0.9485	0.9459	0.9499	0.9476	0.9549
CHEMBL4681	0.8517	0.8632	0.8228	0.8689	0.8782
CHEMBL4683	0.8932	0.8795	0.7712	0.9685	0.9767
CHEMBL4860	0.9359	0.9326	0.896	0.9342	0.9306
CHEMBL5366	0.8814	0.8827	0.8506	0.9688	0.9737
CHEMBL5979	0.7764	0.7833	0.619	0.893	0.9206
CHEMBL6135	0.9224	0.9139	0.6863	0.9261	0.931
CHEMBL208	0.8989	0.8951	0.8698	0.926	0.9284
CHEMBL209	0.9023	0.8809	0.8775	0.9529	0.9421
CHEMBL252	0.9047	0.8907	0.827	0.89	0.8947
CHEMBL1808	0.8944	0.8885	0.8765	0.9081	0.922
CHEMBL1809	0.9567	0.9414	0.8608	0.9595	0.9546
CHEMBL1853	0.8797	0.8797	0.6671	0.8974	0.9059
CHEMBL1926	0.9146	0.9099	0.853	0.9157	0.9213
CHEMBL1955	0.8332	0.807	0.7739	0.8524	0.8347
CHEMBL2051	0.8368	0.8372	0.7972	0.8174	0.8459
CHEMBL2252	0.8992	0.8885	0.8796	0.902	0.9164
CHEMBL2285	0.8995	0.8991	0.8728	0.9135	0.9133
CHEMBL2508	0.8932	0.8734	0.8525	0.8923	0.8707
CHEMBL2534	0.9426	0.9396	0.918	0.9415	0.9425
CHEMBL3116	0.8219	0.8141	0.7845	0.8454	0.8695
CHEMBL3710	0.874	0.8418	0.7676	0.9005	0.9203
CHEMBL3776	0.4336	0.4231	0.545	0.9504	0.9535
CHEMBL3922	0.9037	0.8968	0.8884	0.9001	0.9103
CHEMBL3979	0.8803	0.8909	0.8705	0.9522	0.9577
CHEMBL4321	0.9364	0.9297	0.8441	0.9694	0.9716
CHEMBL4718	0.8309	0.8228	0.8201	0.9286	0.9143
CHEMBL4780	0.8965	0.8896	0.8758	0.9032	0.9135
CHEMBL4804	0.8888	0.8701	0.8688	0.8908	0.8831
CHEMBL5407	0.8602	0.8473	0.8773	0.8502	0.8837
CHEMBL6140	0.9475	0.94	0.938	0.9371	0.9392
CHEMBL6154	0.8351	0.8219	0.8202	0.8373	0.8731
CHEMBL1293244	0.8564	0.8298	0.7778	0.8654	0.854
CHEMBL1741186	0.8553	0.8474	0.8275	0.8594	0.8745
CHEMBL1795116	0.8935	0.8915	0.8725	0.9227	0.9089
CHEMBL222	0.8546	0.844	0.801	0.8445	0.8597
CHEMBL236	0.9144	0.8841	0.832	0.9375	0.9356
CHEMBL1947	0.9749	0.9665	0.9601	0.9664	0.9786
CHEMBL1980	0.7634	0.8031	0.7902	0.923	0.9224
CHEMBL1981	0.9208	0.8912	0.8877	0.9453	0.9549
CHEMBL1994	0.7615	0.746	0.6775	0.8339	0.8642
CHEMBL2127	0.8697	0.8716	0.8622	0.8774	0.8835
CHEMBL2292	0.8697	0.8556	0.8408	0.8881	0.9014
CHEMBL2318	0.9135	0.901	0.8647	0.9177	0.931
CHEMBL2335	0.8946	0.8918	0.868	0.8875	0.911
CHEMBL2527	0.925	0.9152	0.9081	0.9195	0.9305
CHEMBL2871	0.813	0.81	0.6663	0.8435	0.8631
CHEMBL3229	0.83	0.8186	0.8261	0.8508	0.8496
CHEMBL3238	0.7889	0.7983	0.6832	0.8638	0.8604
CHEMBL3563	0.8876	0.8712	0.8448	0.8911	0.9087
CHEMBL3577	0.8881	0.8871	0.854	0.886	0.9003
CHEMBL3589	0.8881	0.8688	0.8633	0.9345	0.9481
CHEMBL3629	0.9378	0.929	0.8709	0.9511	0.9526
CHEMBL4026	0.8618	0.8502	0.8368	0.8744	0.8766
CHEMBL4036	0.8096	0.7708	0.6975	0.9113	0.9239
CHEMBL4191	0.9072	0.9	0.8851	0.9152	0.9294
CHEMBL4393	0.9114	0.9104	0.8805	0.9287	0.9404
CHEMBL4581	0.8956	0.8953	0.88	0.8956	0.9185
CHEMBL4618	0.8295	0.8156	0.7508	0.8234	0.8454
CHEMBL4803	0.807	0.7914	0.8031	0.8123	0.8355
CHEMBL5077	0.9439	0.946	0.9244	0.9569	0.9551
CHEMBL5314	0.892	0.8639	0.8315	0.8906	0.9014
CHEMBL5462	0.9488	0.9478	0.9174	0.9543	0.9516
CHEMBL1075145	0.7302	0.6984	0.6087	0.7642	0.8153
CHEMBL1795177	0.851	0.8339	0.8027	0.8509	0.8551
CHEMBL3988596	0.9314	0.9381	0.9206	0.9342	0.9403
CHEMBL224	0.8533	0.8508	0.7442	0.8852	0.8863
CHEMBL227	0.9305	0.9241	0.8774	0.9441	0.9429
CHEMBL233	0.8792	0.8452	0.7923	0.9042	0.9044
CHEMBL1825	0.8722	0.8726	0.819	0.8862	0.8885
CHEMBL1944	0.8842	0.9047	0.8579	0.9303	0.9376
CHEMBL1952	0.873	0.8777	0.8212	0.8908	0.9243
CHEMBL1978	0.8645	0.8563	0.8489	0.879	0.8886
CHEMBL2041	0.8264	0.8132	0.7831	0.8459	0.8591
CHEMBL2108	0.8803	0.8763	0.8709	0.8839	0.8835
CHEMBL2243	0.9012	0.8983	0.8941	0.9113	0.92
CHEMBL2334	0.9366	0.9288	0.912	0.9372	0.9401
CHEMBL2487	0.9139	0.9087	0.8744	0.9279	0.9268
CHEMBL2525	0.9084	0.9037	0.89	0.9035	0.923
CHEMBL2652	0.9458	0.9345	0.8917	0.9455	0.9599
CHEMBL2730	0.8816	0.8753	0.8445	0.8921	0.8847
CHEMBL2903	0.7353	0.7239	0.747	0.9021	0.9051
CHEMBL3202	0.8681	0.8012	0.7777	0.9141	0.914
CHEMBL4550	0.932	0.9268	0.856	0.9276	0.9272
CHEMBL4578	0.9184	0.932	0.8934	0.9241	0.9328
CHEMBL4625	0.9461	0.9286	0.8969	0.9594	0.9622
CHEMBL4801	0.9366	0.9227	0.9055	0.9531	0.9571
CHEMBL5103	0.8848	0.869	0.7864	0.9033	0.901
CHEMBL6032	0.8601	0.8489	0.8203	0.8739	0.8626
CHEMBL1293257	0.8153	0.7995	0.751	0.8169	0.8252
CHEMBL1293269	0.8776	0.8691	0.8522	0.8714	0.8818
CHEMBL2189121	0.9473	0.9416	0.6412	0.9551	0.963

## Sheet: Accuracy_3
Dataset	RF	XGB	CP	ΔCL	DΔC
CHEMBL4561	0.7348	0.7307	0.6753	0.7468	0.7366
CHEMBL202	0.8199	0.8079	0.7411	0.8406	0.8512
CHEMBL217	0.7753	0.7523	0.75	0.8408	0.841
CHEMBL228	0.8156	0.815	0.7903	0.8307	0.8402
CHEMBL1785	0.8624	0.8529	0.8258	0.8648	0.8883
CHEMBL1792	0.7322	0.7391	0.7712	0.8623	0.8825
CHEMBL1801	0.7185	0.694	0.6434	0.8243	0.8285
CHEMBL1806	0.7131	0.7276	0.7549	0.8464	0.8579
CHEMBL1966	0.8069	0.7944	0.7935	0.8485	0.8732
CHEMBL2716	0.7415	0.7395	0.6673	0.847	0.8264
CHEMBL2850	0.7879	0.7711	0.7508	0.819	0.8207
CHEMBL3024	0.8518	0.8398	0.8016	0.8798	0.9054
CHEMBL3234	0.7675	0.7588	0.7307	0.7862	0.8113
CHEMBL3369	0.7297	0.7223	0.6871	0.7317	0.7397
CHEMBL3568	0.82	0.8217	0.809	0.8168	0.8235
CHEMBL3582	0.7771	0.7664	0.6424	0.7806	0.7963
CHEMBL3807	0.8579	0.84	0.7845	0.8835	0.8941
CHEMBL4204	0.8659	0.8653	0.8473	0.865	0.8624
CHEMBL4372	0.7689	0.7386	0.666	0.826	0.8135
CHEMBL4588	0.8408	0.8373	0.8106	0.8379	0.866
CHEMBL5080	0.8644	0.8459	0.8455	0.8667	0.8663
CHEMBL5285	0.8551	0.8368	0.8014	0.8732	0.875
CHEMBL5331	0.7884	0.7888	0.7167	0.792	0.7831
CHEMBL5469	0.6377	0.6727	0.7261	0.8671	0.8912
CHEMBL5697	0.8361	0.8176	0.7962	0.8392	0.8633
CHEMBL1250348	0.7815	0.7135	0.7274	0.862	0.8954
CHEMBL1293311	0.6282	0.611	0.547	0.5982	0.6257
CHEMBL1795186	0.6853	0.6794	0.7363	0.7034	0.8104
CHEMBL2189110	0.7825	0.7759	0.7256	0.7695	0.7894
CHEMBL2216739	0.8393	0.816	0.8129	0.8162	0.8205
CHEMBL3988599	0.7838	0.7666	0.7683	0.7796	0.7806
CHEMBL205	0.865	0.8456	0.7907	0.8686	0.8813
CHEMBL238	0.8296	0.8167	0.8129	0.8376	0.8625
CHEMBL239	0.7381	0.7206	0.7244	0.7953	0.8064
CHEMBL288	0.8431	0.8375	0.7869	0.8542	0.8716
CHEMBL1781	0.7954	0.7891	0.7765	0.837	0.8544
CHEMBL1917	0.745	0.7594	0.6601	0.7926	0.8407
CHEMBL2007	0.7487	0.7409	0.7055	0.794	0.8075
CHEMBL2563	0.7657	0.7506	0.6209	0.8534	0.8435
CHEMBL3286	0.7743	0.7811	0.7531	0.8289	0.8517
CHEMBL3587	0.8048	0.7906	0.7682	0.8303	0.8558
CHEMBL3721	0.6006	0.5768	0.5965	0.7515	0.7729
CHEMBL3746	0.6498	0.6157	0.5372	0.7117	0.7814
CHEMBL4015	0.8066	0.7897	0.7828	0.8088	0.8167
CHEMBL4072	0.7816	0.7498	0.7528	0.8416	0.8493
CHEMBL4161	0.828	0.8195	0.758	0.8111	0.8161
CHEMBL4439	0.8269	0.8144	0.7724	0.8374	0.8328
CHEMBL4462	0.7852	0.7748	0.725	0.8004	0.8054
CHEMBL4599	0.7508	0.7396	0.6931	0.8021	0.8274
CHEMBL4766	0.7859	0.7571	0.7346	0.8428	0.8462
CHEMBL4835	0.8623	0.8544	0.8217	0.8802	0.9012
CHEMBL5491	0.865	0.8428	0.7424	0.8719	0.8802
CHEMBL5543	0.7152	0.7315	0.6327	0.7433	0.7539
CHEMBL5620	0.8193	0.823	0.8028	0.8482	0.8504
CHEMBL6164	0.7453	0.733	0.7254	0.7507	0.7843
CHEMBL1163101	0.7167	0.675	0.475	0.934	0.9243
CHEMBL1293289	0.7474	0.7131	0.7437	0.7356	0.8182
CHEMBL2169736	0.7374	0.7281	0.6797	0.8076	0.8068
CHEMBL3638344	0.8699	0.8707	0.874	0.8676	0.9101
CHEMBL4296013	0.8142	0.8227	0.7047	0.8457	0.8636
CHEMBL249	0.7657	0.7559	0.7126	0.7884	0.797
CHEMBL261	0.8174	0.8138	0.7905	0.8742	0.8873
CHEMBL274	0.8158	0.8025	0.7637	0.8136	0.8152
CHEMBL338	0.81	0.7938	0.7869	0.8032	0.8285
CHEMBL1871	0.7823	0.809	0.751	0.8463	0.8438
CHEMBL1900	0.8034	0.7955	0.7502	0.8264	0.8257
CHEMBL1929	0.8222	0.8133	0.7941	0.8722	0.8825
CHEMBL2028	0.7459	0.744	0.6511	0.741	0.778
CHEMBL2207	0.755	0.7316	0.7177	0.7286	0.7743
CHEMBL2439	0.7961	0.8008	0.7211	0.8253	0.8185
CHEMBL2808	0.81	0.8133	0.7016	0.8336	0.8367
CHEMBL2820	0.8752	0.8572	0.8109	0.862	0.8827
CHEMBL2993	0.8408	0.8421	0.8039	0.8366	0.8725
CHEMBL3045	0.7672	0.7642	0.7264	0.8407	0.8449
CHEMBL3332	0.8124	0.786	0.7745	0.8107	0.7981
CHEMBL3468	0.8202	0.7975	0.7874	0.8315	0.829
CHEMBL3535	0.6771	0.709	0.5874	0.8686	0.8767
CHEMBL3864	0.8272	0.8121	0.7369	0.8923	0.8987
CHEMBL3910	0.7919	0.7827	0.7615	0.7906	0.8042
CHEMBL4073	0.788	0.7557	0.7489	0.8361	0.8386
CHEMBL4074	0.8157	0.8148	0.8108	0.8196	0.8426
CHEMBL4128	0.7908	0.7773	0.7469	0.7944	0.8304
CHEMBL4662	0.8322	0.8215	0.8016	0.8435	0.8524
CHEMBL5147	0.7561	0.7571	0.7089	0.7561	0.7726
CHEMBL5192	0.7802	0.7492	0.7664	0.7853	0.8269
CHEMBL5408	0.7862	0.7751	0.7028	0.8656	0.8659
CHEMBL6115	0.857	0.8511	0.8186	0.8652	0.8962
CHEMBL298	0.8217	0.785	0.7662	0.808	0.8241
CHEMBL299	0.8126	0.8107	0.8058	0.8896	0.9014
CHEMBL339	0.7524	0.7074	0.6656	0.821	0.817
CHEMBL1856	0.8986	0.8935	0.8306	0.8994	0.8892
CHEMBL2002	0.8033	0.7798	0.6643	0.8279	0.8338
CHEMBL2996	0.8179	0.8193	0.7859	0.8206	0.8259
CHEMBL2998	0.8251	0.8465	0.8135	0.8289	0.8729
CHEMBL3066	0.8577	0.8351	0.8088	0.8501	0.8537
CHEMBL3081	0.8323	0.8278	0.8264	0.8316	0.8686
CHEMBL3476	0.7994	0.7725	0.7211	0.8249	0.8312
CHEMBL3524	0.7786	0.7585	0.7448	0.8731	0.8786
CHEMBL3691	0.8066	0.7985	0.7843	0.8041	0.8189
CHEMBL3891	0.7726	0.7629	0.7325	0.7853	0.7765
CHEMBL4102	0.7463	0.7346	0.7173	0.769	0.7973
CHEMBL4117	0.6873	0.6714	0.6294	0.6707	0.6737
CHEMBL4303	0.8611	0.8579	0.8275	0.8741	0.8683
CHEMBL4481	0.7649	0.7541	0.7325	0.7463	0.7863
CHEMBL4506	0.8309	0.829	0.7899	0.8545	0.8513
CHEMBL4696	0.7251	0.7096	0.7003	0.7195	0.7179
CHEMBL4895	0.8276	0.8064	0.7972	0.8305	0.8509
CHEMBL4937	0.8386	0.8448	0.7967	0.8425	0.8494
CHEMBL5747	0.8424	0.841	0.7817	0.8491	0.8641
CHEMBL6136	0.7531	0.7261	0.7252	0.868	0.8647
CHEMBL1075138	0.7302	0.7151	0.6852	0.8354	0.8569
CHEMBL1921666	0.8339	0.83	0.819	0.8908	0.8898
CHEMBL2146302	0.8694	0.864	0.8555	0.8748	0.8998
CHEMBL2331053	0.6612	0.6358	0.6006	0.7276	0.7314
CHEMBL2366517	0.8053	0.8255	0.7686	0.8315	0.8469
CHEMBL4523582	0.8065	0.8113	0.7726	0.8592	0.8597
CHEMBL241	0.7339	0.6571	0.646	0.802	0.8031
CHEMBL254	0.837	0.8394	0.7994	0.8547	0.8498
CHEMBL1855	0.8757	0.8623	0.8306	0.8671	0.861
CHEMBL1868	0.7498	0.7406	0.7322	0.8086	0.8443
CHEMBL2179	0.7094	0.6607	0.6305	0.7431	0.8352
CHEMBL2345	0.8352	0.8271	0.7776	0.8329	0.8498
CHEMBL2425	0.8485	0.8387	0.7735	0.8519	0.8451
CHEMBL2431	0.8331	0.8012	0.7912	0.8418	0.8451
CHEMBL2593	0.8556	0.8414	0.8216	0.8398	0.8765
CHEMBL2622	0.804	0.8042	0.786	0.8134	0.8404
CHEMBL2635	0.7598	0.7489	0.6731	0.7684	0.8281
CHEMBL2828	0.8589	0.8617	0.8539	0.8888	0.9005
CHEMBL2959	0.7981	0.7964	0.7526	0.8312	0.8456
CHEMBL3474	0.7742	0.7825	0.7563	0.8059	0.8235
CHEMBL3475	0.739	0.7199	0.7251	0.7337	0.744
CHEMBL3514	0.8749	0.8791	0.849	0.8783	0.8932
CHEMBL3529	0.8152	0.7998	0.7559	0.9143	0.9277
CHEMBL3855	0.8545	0.8497	0.8266	0.8542	0.8483
CHEMBL3869	0.8044	0.8091	0.7881	0.8368	0.8426
CHEMBL3920	0.844	0.8342	0.8159	0.8495	0.8576
CHEMBL4068	0.8093	0.7817	0.7253	0.7939	0.8075
CHEMBL4093	0.7677	0.7862	0.6838	0.8171	0.8224
CHEMBL4508	0.8793	0.879	0.8696	0.8745	0.8763
CHEMBL4681	0.7793	0.7908	0.7451	0.8043	0.8181
CHEMBL4683	0.7991	0.7661	0.6686	0.9059	0.916
CHEMBL4860	0.8623	0.8576	0.8238	0.8541	0.8616
CHEMBL5366	0.8156	0.8008	0.7534	0.9026	0.9076
CHEMBL5979	0.7078	0.7056	0.6088	0.8179	0.8375
CHEMBL6135	0.8432	0.8311	0.6404	0.8502	0.8525
CHEMBL208	0.7859	0.7916	0.7662	0.8429	0.8592
CHEMBL209	0.8097	0.795	0.8007	0.8783	0.8701
CHEMBL252	0.8192	0.7961	0.7419	0.8007	0.8203
CHEMBL1808	0.8178	0.8068	0.7958	0.8342	0.8435
CHEMBL1809	0.8659	0.8534	0.7763	0.8892	0.887
CHEMBL1853	0.7776	0.7794	0.6001	0.8286	0.8346
CHEMBL1926	0.842	0.8331	0.7755	0.8332	0.8554
CHEMBL1955	0.7337	0.7198	0.6931	0.7697	0.7651
CHEMBL2051	0.7601	0.7579	0.725	0.7414	0.782
CHEMBL2252	0.8267	0.8151	0.8084	0.8227	0.8434
CHEMBL2285	0.8024	0.8088	0.7874	0.8246	0.8302
CHEMBL2508	0.7935	0.7767	0.7644	0.7945	0.7863
CHEMBL2534	0.8573	0.853	0.825	0.8626	0.8725
CHEMBL3116	0.7599	0.7558	0.7158	0.7764	0.8049
CHEMBL3710	0.7914	0.7744	0.6882	0.8288	0.8333
CHEMBL3776	0.4867	0.477	0.5334	0.8824	0.8773
CHEMBL3922	0.832	0.8208	0.8124	0.8212	0.8385
CHEMBL3979	0.7953	0.7963	0.8026	0.8861	0.8889
CHEMBL4321	0.8481	0.8465	0.7473	0.907	0.9112
CHEMBL4718	0.7799	0.8036	0.7325	0.8852	0.8641
CHEMBL4780	0.8245	0.8024	0.7963	0.8116	0.8383
CHEMBL4804	0.7987	0.7939	0.7625	0.8007	0.7972
CHEMBL5407	0.7893	0.7814	0.7949	0.7894	0.8148
CHEMBL6140	0.8731	0.8605	0.8588	0.8626	0.8643
CHEMBL6154	0.7521	0.7496	0.7558	0.7631	0.7972
CHEMBL1293244	0.7511	0.7253	0.731	0.7945	0.8032
CHEMBL1741186	0.7771	0.7718	0.7498	0.7737	0.8028
CHEMBL1795116	0.7928	0.7475	0.7551	0.8325	0.8347
CHEMBL222	0.7532	0.7419	0.7129	0.7441	0.773
CHEMBL236	0.8224	0.8001	0.7665	0.8606	0.8696
CHEMBL1947	0.9186	0.9125	0.8772	0.9203	0.9083
CHEMBL1980	0.7036	0.696	0.7294	0.8167	0.8362
CHEMBL1981	0.8455	0.8195	0.7912	0.8762	0.8947
CHEMBL1994	0.6974	0.709	0.6387	0.7695	0.7961
CHEMBL2127	0.7778	0.78	0.7653	0.7927	0.787
CHEMBL2292	0.7825	0.767	0.7556	0.8103	0.8242
CHEMBL2318	0.8182	0.8196	0.7609	0.8397	0.8645
CHEMBL2335	0.8047	0.7885	0.7636	0.7946	0.8085
CHEMBL2527	0.8457	0.8369	0.8199	0.8508	0.856
CHEMBL2871	0.7387	0.7291	0.6282	0.7625	0.7797
CHEMBL3229	0.738	0.7426	0.7391	0.7652	0.7832
CHEMBL3238	0.7018	0.7181	0.6113	0.783	0.7894
CHEMBL3563	0.7945	0.7848	0.7665	0.8174	0.8377
CHEMBL3577	0.8035	0.8125	0.7482	0.8114	0.8306
CHEMBL3589	0.8148	0.8067	0.7704	0.8622	0.8717
CHEMBL3629	0.8549	0.8462	0.7741	0.8649	0.877
CHEMBL4026	0.794	0.7912	0.7513	0.8019	0.7895
CHEMBL4036	0.7605	0.7356	0.6323	0.835	0.8487
CHEMBL4191	0.8364	0.8182	0.807	0.832	0.8603
CHEMBL4393	0.8205	0.8199	0.7979	0.8482	0.8671
CHEMBL4581	0.8082	0.8035	0.7925	0.815	0.8399
CHEMBL4618	0.7489	0.7431	0.7056	0.7421	0.7718
CHEMBL4803	0.7373	0.7383	0.7338	0.741	0.7664
CHEMBL5077	0.856	0.8713	0.8411	0.8789	0.8809
CHEMBL5314	0.8045	0.8011	0.7503	0.8104	0.8358
CHEMBL5462	0.8732	0.8697	0.8402	0.8922	0.8963
CHEMBL1075145	0.725	0.7017	0.6158	0.77	0.7963
CHEMBL1795177	0.7813	0.7791	0.7559	0.7708	0.772
CHEMBL3988596	0.838	0.8486	0.8283	0.8484	0.8624
CHEMBL224	0.7493	0.7486	0.6868	0.7901	0.8021
CHEMBL227	0.8543	0.8425	0.7872	0.8682	0.8663
CHEMBL233	0.7785	0.7619	0.6986	0.8309	0.827
CHEMBL1825	0.7967	0.7961	0.7424	0.8009	0.8041
CHEMBL1944	0.8108	0.8218	0.7817	0.8607	0.8601
CHEMBL1952	0.8027	0.7849	0.753	0.8183	0.8443
CHEMBL1978	0.7807	0.7676	0.7649	0.8036	0.8083
CHEMBL2041	0.7504	0.7328	0.718	0.779	0.7797
CHEMBL2108	0.7958	0.796	0.7745	0.7969	0.7834
CHEMBL2243	0.8221	0.8161	0.8149	0.8342	0.8489
CHEMBL2334	0.8609	0.8478	0.8269	0.8604	0.8676
CHEMBL2487	0.834	0.8319	0.7838	0.8477	0.8557
CHEMBL2525	0.8303	0.8341	0.8082	0.8236	0.8483
CHEMBL2652	0.8636	0.8592	0.8097	0.8718	0.894
CHEMBL2730	0.7888	0.7778	0.7553	0.8042	0.8139
CHEMBL2903	0.653	0.6624	0.6781	0.805	0.8314
CHEMBL3202	0.7666	0.713	0.7265	0.8159	0.8328
CHEMBL4550	0.8526	0.8462	0.7586	0.8503	0.853
CHEMBL4578	0.8357	0.8607	0.7967	0.8416	0.864
CHEMBL4625	0.8737	0.8524	0.8212	0.8941	0.9047
CHEMBL4801	0.8619	0.842	0.8198	0.8811	0.8919
CHEMBL5103	0.7945	0.7748	0.7196	0.8126	0.8166
CHEMBL6032	0.7779	0.7632	0.7431	0.795	0.8078
CHEMBL1293257	0.7541	0.7271	0.6938	0.7398	0.7635
CHEMBL1293269	0.7984	0.7941	0.7715	0.7938	0.8054
CHEMBL2189121	0.8625	0.8558	0.6405	0.879	0.897

## Sheet: F1_3
Dataset	RF	XGB	CP	ΔCL	DΔC
CHEMBL4561	0.7348	0.7306	0.6753	0.7495	0.7358
CHEMBL202	0.8198	0.8079	0.7411	0.8408	0.8511
CHEMBL217	0.7753	0.7523	0.75	0.8418	0.8397
CHEMBL228	0.8155	0.815	0.7903	0.831	0.8399
CHEMBL1785	0.8624	0.8529	0.8258	0.8654	0.8887
CHEMBL1792	0.7321	0.7389	0.7712	0.8626	0.8821
CHEMBL1801	0.7185	0.694	0.6434	0.8242	0.8293
CHEMBL1806	0.7131	0.7275	0.7549	0.8468	0.8571
CHEMBL1966	0.8069	0.7944	0.7935	0.8479	0.8733
CHEMBL2716	0.7414	0.7394	0.6673	0.8465	0.8262
CHEMBL2850	0.7879	0.7711	0.7508	0.8189	0.8199
CHEMBL3024	0.8517	0.8398	0.8016	0.8799	0.9059
CHEMBL3234	0.7674	0.7587	0.7307	0.7866	0.8106
CHEMBL3369	0.7295	0.7222	0.6871	0.7296	0.7415
CHEMBL3568	0.82	0.8217	0.809	0.8156	0.823
CHEMBL3582	0.777	0.7663	0.6424	0.7825	0.7967
CHEMBL3807	0.8579	0.84	0.7845	0.8837	0.8942
CHEMBL4204	0.8659	0.8653	0.8473	0.8649	0.8626
CHEMBL4372	0.7689	0.7385	0.666	0.826	0.812
CHEMBL4588	0.8408	0.8373	0.8106	0.8376	0.8664
CHEMBL5080	0.8644	0.8459	0.8455	0.8674	0.8671
CHEMBL5285	0.8551	0.8368	0.8014	0.8728	0.8746
CHEMBL5331	0.7883	0.7888	0.7167	0.7919	0.7851
CHEMBL5469	0.6377	0.6727	0.7261	0.8681	0.8916
CHEMBL5697	0.8361	0.8176	0.7962	0.8387	0.8627
CHEMBL1250348	0.7814	0.7134	0.7274	0.8622	0.895
CHEMBL1293311	0.6282	0.611	0.547	0.6047	0.6215
CHEMBL1795186	0.6851	0.6791	0.7363	0.7063	0.8119
CHEMBL2189110	0.7825	0.7759	0.7256	0.7663	0.7911
CHEMBL2216739	0.8393	0.816	0.8129	0.8154	0.8207
CHEMBL3988599	0.7837	0.7665	0.7683	0.7781	0.7811
CHEMBL205	0.865	0.8456	0.7907	0.8686	0.8808
CHEMBL238	0.8296	0.8166	0.8129	0.8372	0.8628
CHEMBL239	0.738	0.7205	0.7244	0.796	0.8067
CHEMBL288	0.8431	0.8374	0.7869	0.8543	0.8712
CHEMBL1781	0.7953	0.789	0.7765	0.8369	0.8555
CHEMBL1917	0.7445	0.759	0.6601	0.792	0.8388
CHEMBL2007	0.7487	0.7408	0.7055	0.7929	0.8064
CHEMBL2563	0.7655	0.7504	0.6209	0.8538	0.8446
CHEMBL3286	0.7743	0.7811	0.7531	0.8305	0.8501
CHEMBL3587	0.8048	0.7906	0.7682	0.8299	0.8557
CHEMBL3721	0.6006	0.5768	0.5965	0.7534	0.775
CHEMBL3746	0.6498	0.6156	0.5372	0.7128	0.7775
CHEMBL4015	0.8066	0.7897	0.7828	0.8088	0.8152
CHEMBL4072	0.7816	0.7498	0.7528	0.8417	0.8495
CHEMBL4161	0.828	0.8194	0.758	0.8124	0.8162
CHEMBL4439	0.8269	0.8144	0.7724	0.8379	0.8339
CHEMBL4462	0.7852	0.7748	0.725	0.7997	0.8052
CHEMBL4599	0.7508	0.7396	0.6931	0.8027	0.8281
CHEMBL4766	0.7858	0.7571	0.7346	0.8434	0.8463
CHEMBL4835	0.8623	0.8543	0.8217	0.8799	0.9012
CHEMBL5491	0.865	0.8428	0.7424	0.8715	0.8821
CHEMBL5543	0.7152	0.7315	0.6327	0.7441	0.7564
CHEMBL5620	0.8192	0.8229	0.8028	0.8489	0.8505
CHEMBL6164	0.7453	0.7329	0.7254	0.7492	0.784
CHEMBL1163101	0.7167	0.675	0.475	0.9345	0.924
CHEMBL1293289	0.7472	0.7129	0.7437	0.7344	0.8175
CHEMBL2169736	0.7374	0.7281	0.6797	0.8071	0.8056
CHEMBL3638344	0.8698	0.8706	0.874	0.8672	0.9102
CHEMBL4296013	0.8142	0.8226	0.7047	0.846	0.8635
CHEMBL249	0.7657	0.7558	0.7126	0.7878	0.7973
CHEMBL261	0.8174	0.8137	0.7905	0.8743	0.8867
CHEMBL274	0.8157	0.8025	0.7637	0.8135	0.8149
CHEMBL338	0.8099	0.7938	0.7869	0.8019	0.8289
CHEMBL1871	0.7823	0.8089	0.751	0.8458	0.8423
CHEMBL1900	0.8034	0.7954	0.7502	0.8273	0.8245
CHEMBL1929	0.8222	0.8133	0.7941	0.8721	0.8822
CHEMBL2028	0.7456	0.7436	0.6511	0.7415	0.7773
CHEMBL2207	0.7549	0.7316	0.7177	0.73	0.7728
CHEMBL2439	0.7961	0.8008	0.7211	0.8256	0.8189
CHEMBL2808	0.81	0.8132	0.7016	0.833	0.8351
CHEMBL2820	0.8752	0.8572	0.8109	0.8621	0.8824
CHEMBL2993	0.8408	0.8421	0.8039	0.8369	0.8721
CHEMBL3045	0.7672	0.7642	0.7264	0.8406	0.8465
CHEMBL3332	0.8124	0.7859	0.7745	0.8109	0.8004
CHEMBL3468	0.8202	0.7975	0.7874	0.8315	0.8286
CHEMBL3535	0.6771	0.7089	0.5874	0.8688	0.8764
CHEMBL3864	0.8272	0.8121	0.7369	0.8924	0.8987
CHEMBL3910	0.7919	0.7826	0.7615	0.7918	0.8056
CHEMBL4073	0.788	0.7555	0.7489	0.836	0.8388
CHEMBL4074	0.8157	0.8147	0.8108	0.8193	0.843
CHEMBL4128	0.7907	0.7772	0.7469	0.7942	0.8313
CHEMBL4662	0.8322	0.8215	0.8016	0.8437	0.8521
CHEMBL5147	0.7561	0.7571	0.7089	0.7549	0.7727
CHEMBL5192	0.7802	0.7492	0.7664	0.7877	0.8274
CHEMBL5408	0.7862	0.7751	0.7028	0.8648	0.8653
CHEMBL6115	0.857	0.8511	0.8186	0.8651	0.896
CHEMBL298	0.8216	0.7848	0.7662	0.8084	0.8223
CHEMBL299	0.8125	0.8107	0.8058	0.8898	0.9015
CHEMBL339	0.7524	0.7073	0.6656	0.8216	0.8163
CHEMBL1856	0.8986	0.8935	0.8306	0.899	0.8896
CHEMBL2002	0.8033	0.7798	0.6643	0.8283	0.8337
CHEMBL2996	0.8179	0.8192	0.7859	0.8207	0.8265
CHEMBL2998	0.8251	0.8465	0.8135	0.8291	0.873
CHEMBL3066	0.8577	0.8351	0.8088	0.8503	0.8525
CHEMBL3081	0.8323	0.8278	0.8264	0.8311	0.8684
CHEMBL3476	0.7994	0.7725	0.7211	0.8256	0.8321
CHEMBL3524	0.7786	0.7585	0.7448	0.873	0.8785
CHEMBL3691	0.8066	0.7985	0.7843	0.8038	0.8185
CHEMBL3891	0.7726	0.7629	0.7325	0.7844	0.7789
CHEMBL4102	0.7463	0.7346	0.7173	0.7692	0.7973
CHEMBL4117	0.6873	0.6714	0.6294	0.6726	0.6728
CHEMBL4303	0.8611	0.8578	0.8275	0.8737	0.8687
CHEMBL4481	0.7649	0.754	0.7325	0.7447	0.7871
CHEMBL4506	0.8308	0.829	0.7899	0.8548	0.8512
CHEMBL4696	0.7251	0.7096	0.7003	0.7207	0.7181
CHEMBL4895	0.8276	0.8063	0.7972	0.8305	0.8506
CHEMBL4937	0.8386	0.8448	0.7967	0.8423	0.8501
CHEMBL5747	0.8423	0.841	0.7817	0.8488	0.8631
CHEMBL6136	0.7531	0.726	0.7252	0.8682	0.8644
CHEMBL1075138	0.7301	0.715	0.6852	0.8353	0.857
CHEMBL1921666	0.8339	0.8299	0.819	0.8903	0.8894
CHEMBL2146302	0.8694	0.864	0.8555	0.8749	0.8999
CHEMBL2331053	0.6589	0.6351	0.6006	0.7271	0.7318
CHEMBL2366517	0.8053	0.8255	0.7686	0.8308	0.8459
CHEMBL4523582	0.8065	0.8113	0.7726	0.859	0.8594
CHEMBL241	0.7338	0.6571	0.646	0.7989	0.8026
CHEMBL254	0.837	0.8394	0.7994	0.8553	0.8505
CHEMBL1855	0.8757	0.8623	0.8306	0.8662	0.8599
CHEMBL1868	0.7498	0.7406	0.7322	0.8082	0.8449
CHEMBL2179	0.7089	0.6601	0.6305	0.7436	0.8338
CHEMBL2345	0.8352	0.827	0.7776	0.8323	0.8495
CHEMBL2425	0.8485	0.8387	0.7735	0.8518	0.845
CHEMBL2431	0.8331	0.8012	0.7912	0.8418	0.8444
CHEMBL2593	0.8556	0.8413	0.8216	0.8389	0.8767
CHEMBL2622	0.804	0.8042	0.786	0.8132	0.8402
CHEMBL2635	0.7598	0.7488	0.6731	0.7659	0.8279
CHEMBL2828	0.8589	0.8617	0.8539	0.8884	0.9009
CHEMBL2959	0.7981	0.7964	0.7526	0.831	0.8463
CHEMBL3474	0.7739	0.7823	0.7563	0.805	0.824
CHEMBL3475	0.739	0.7199	0.7251	0.7351	0.7484
CHEMBL3514	0.8749	0.8791	0.849	0.8782	0.8938
CHEMBL3529	0.8152	0.7998	0.7559	0.9145	0.9279
CHEMBL3855	0.8545	0.8497	0.8266	0.854	0.8493
CHEMBL3869	0.8044	0.8091	0.7881	0.8369	0.8428
CHEMBL3920	0.8439	0.8342	0.8159	0.8495	0.8577
CHEMBL4068	0.8093	0.7817	0.7253	0.7939	0.808
CHEMBL4093	0.7677	0.7862	0.6838	0.8163	0.8208
CHEMBL4508	0.8793	0.879	0.8696	0.8752	0.8763
CHEMBL4681	0.7793	0.7908	0.7451	0.8048	0.8191
CHEMBL4683	0.799	0.766	0.6686	0.9057	0.916
CHEMBL4860	0.8622	0.8576	0.8238	0.8543	0.8616
CHEMBL5366	0.8156	0.8008	0.7534	0.9026	0.9079
CHEMBL5979	0.7078	0.7056	0.6088	0.8181	0.8382
CHEMBL6135	0.8432	0.8311	0.6404	0.85	0.8526
CHEMBL208	0.7859	0.7916	0.7662	0.8432	0.8598
CHEMBL209	0.8097	0.795	0.8007	0.8783	0.8704
CHEMBL252	0.8192	0.7961	0.7419	0.8004	0.8195
CHEMBL1808	0.8178	0.8068	0.7958	0.835	0.8425
CHEMBL1809	0.8659	0.8534	0.7763	0.8895	0.8867
CHEMBL1853	0.7774	0.7793	0.6001	0.8304	0.8345
CHEMBL1926	0.842	0.8331	0.7755	0.8338	0.8555
CHEMBL1955	0.7337	0.7198	0.6931	0.769	0.7638
CHEMBL2051	0.76	0.7578	0.725	0.741	0.7813
CHEMBL2252	0.8267	0.8151	0.8084	0.8226	0.8433
CHEMBL2285	0.8024	0.8088	0.7874	0.8266	0.8307
CHEMBL2508	0.7935	0.7767	0.7644	0.7927	0.7875
CHEMBL2534	0.8573	0.853	0.825	0.8621	0.8722
CHEMBL3116	0.7599	0.7558	0.7158	0.7765	0.8056
CHEMBL3710	0.7914	0.7744	0.6882	0.8303	0.8343
CHEMBL3776	0.4867	0.477	0.5334	0.8822	0.8784
CHEMBL3922	0.832	0.8208	0.8124	0.8209	0.8392
CHEMBL3979	0.7953	0.7963	0.8026	0.8863	0.8886
CHEMBL4321	0.8481	0.8465	0.7473	0.9071	0.911
CHEMBL4718	0.7799	0.8036	0.7325	0.8844	0.8635
CHEMBL4780	0.8245	0.8024	0.7963	0.8119	0.8392
CHEMBL4804	0.7987	0.7939	0.7625	0.8007	0.7973
CHEMBL5407	0.7893	0.7814	0.7949	0.7903	0.8136
CHEMBL6140	0.8731	0.8604	0.8588	0.8626	0.8647
CHEMBL6154	0.752	0.7495	0.7558	0.7636	0.796
CHEMBL1293244	0.751	0.7252	0.731	0.7976	0.8038
CHEMBL1741186	0.7771	0.7718	0.7498	0.7733	0.8014
CHEMBL1795116	0.7927	0.7474	0.7551	0.8322	0.836
CHEMBL222	0.7531	0.7418	0.7129	0.7443	0.7723
CHEMBL236	0.8223	0.8	0.7665	0.8617	0.87
CHEMBL1947	0.9186	0.9125	0.8772	0.9204	0.9089
CHEMBL1980	0.7036	0.696	0.7294	0.8166	0.8356
CHEMBL1981	0.8455	0.8194	0.7912	0.8762	0.8947
CHEMBL1994	0.6974	0.709	0.6387	0.7714	0.7942
CHEMBL2127	0.7778	0.78	0.7653	0.7941	0.7856
CHEMBL2292	0.7825	0.7669	0.7556	0.8122	0.8236
CHEMBL2318	0.8182	0.8196	0.7609	0.8392	0.8632
CHEMBL2335	0.8046	0.7885	0.7636	0.7951	0.8074
CHEMBL2527	0.8457	0.8369	0.8199	0.85	0.8556
CHEMBL2871	0.7386	0.7288	0.6282	0.7617	0.7785
CHEMBL3229	0.738	0.7426	0.7391	0.7661	0.7842
CHEMBL3238	0.7018	0.7181	0.6113	0.7839	0.7869
CHEMBL3563	0.7945	0.7848	0.7665	0.818	0.8381
CHEMBL3577	0.8035	0.8124	0.7482	0.8116	0.8298
CHEMBL3589	0.8148	0.8066	0.7704	0.8629	0.8704
CHEMBL3629	0.8549	0.8462	0.7741	0.8646	0.8778
CHEMBL4026	0.794	0.7912	0.7513	0.8028	0.7927
CHEMBL4036	0.7605	0.7355	0.6323	0.8337	0.8478
CHEMBL4191	0.8363	0.8182	0.807	0.8321	0.8605
CHEMBL4393	0.8204	0.8198	0.7979	0.8478	0.8675
CHEMBL4581	0.8082	0.8035	0.7925	0.8153	0.8411
CHEMBL4618	0.7488	0.743	0.7056	0.7425	0.7719
CHEMBL4803	0.7372	0.7383	0.7338	0.7412	0.7665
CHEMBL5077	0.856	0.8713	0.8411	0.8791	0.881
CHEMBL5314	0.8043	0.801	0.7503	0.8103	0.8346
CHEMBL5462	0.8731	0.8696	0.8402	0.8922	0.8959
CHEMBL1075145	0.725	0.7017	0.6158	0.7665	0.7968
CHEMBL1795177	0.7813	0.7791	0.7559	0.7721	0.7718
CHEMBL3988596	0.838	0.8486	0.8283	0.8485	0.8628
CHEMBL224	0.7493	0.7486	0.6868	0.7898	0.803
CHEMBL227	0.8543	0.8425	0.7872	0.8681	0.8664
CHEMBL233	0.7784	0.7618	0.6986	0.8312	0.8281
CHEMBL1825	0.7967	0.796	0.7424	0.8009	0.8033
CHEMBL1944	0.8107	0.8217	0.7817	0.861	0.8601
CHEMBL1952	0.8027	0.7849	0.753	0.8182	0.8446
CHEMBL1978	0.7807	0.7676	0.7649	0.8032	0.809
CHEMBL2041	0.7504	0.7328	0.718	0.7781	0.7786
CHEMBL2108	0.7958	0.796	0.7745	0.7968	0.7828
CHEMBL2243	0.8221	0.8161	0.8149	0.8338	0.8483
CHEMBL2334	0.8608	0.8478	0.8269	0.8603	0.8674
CHEMBL2487	0.834	0.8319	0.7838	0.8475	0.8565
CHEMBL2525	0.8303	0.8341	0.8082	0.8232	0.8484
CHEMBL2652	0.8636	0.8592	0.8097	0.8718	0.8942
CHEMBL2730	0.7888	0.7778	0.7553	0.8037	0.8122
CHEMBL2903	0.653	0.6623	0.6781	0.8055	0.8316
CHEMBL3202	0.7666	0.713	0.7265	0.8161	0.8319
CHEMBL4550	0.8526	0.8462	0.7586	0.8508	0.8526
CHEMBL4578	0.8357	0.8606	0.7967	0.8421	0.8643
CHEMBL4625	0.8737	0.8524	0.8212	0.8943	0.9045
CHEMBL4801	0.8619	0.842	0.8198	0.8812	0.8917
CHEMBL5103	0.7945	0.7747	0.7196	0.8119	0.8178
CHEMBL6032	0.7779	0.7632	0.7431	0.7941	0.8067
CHEMBL1293257	0.7539	0.7269	0.6938	0.7395	0.7684
CHEMBL1293269	0.7984	0.7941	0.7715	0.7948	0.8051
CHEMBL2189121	0.8624	0.8557	0.6405	0.8798	0.8968

## Sheet: AUC_3
Dataset	RF	XGB	CP	ΔCL	DΔC
CHEMBL4561	0.8026	0.8014	0.7361	0.8258	0.8091
CHEMBL202	0.8997	0.884	0.8139	0.9208	0.9224
CHEMBL217	0.8706	0.8416	0.8279	0.9131	0.9128
CHEMBL228	0.8985	0.8996	0.8729	0.9148	0.9171
CHEMBL1785	0.9397	0.9326	0.9165	0.9425	0.957
CHEMBL1792	0.8368	0.8433	0.869	0.9428	0.9573
CHEMBL1801	0.7925	0.7146	0.7251	0.9051	0.9091
CHEMBL1806	0.7789	0.7851	0.8254	0.9225	0.9326
CHEMBL1966	0.8927	0.8759	0.8766	0.9285	0.9405
CHEMBL2716	0.8262	0.8148	0.7177	0.9189	0.9134
CHEMBL2850	0.8698	0.8569	0.8305	0.8911	0.8997
CHEMBL3024	0.9324	0.9212	0.888	0.9495	0.9653
CHEMBL3234	0.855	0.8314	0.8015	0.8601	0.8863
CHEMBL3369	0.8182	0.7987	0.7554	0.8116	0.8119
CHEMBL3568	0.9062	0.9048	0.8901	0.9034	0.9017
CHEMBL3582	0.857	0.8442	0.6826	0.8586	0.8758
CHEMBL3807	0.9357	0.9138	0.8717	0.9528	0.9575
CHEMBL4204	0.94	0.9377	0.926	0.94	0.9317
CHEMBL4372	0.8412	0.8059	0.7337	0.902	0.8961
CHEMBL4588	0.9142	0.9133	0.8944	0.9131	0.9327
CHEMBL5080	0.9423	0.9153	0.9269	0.9423	0.9447
CHEMBL5285	0.9303	0.9175	0.8701	0.9389	0.9465
CHEMBL5331	0.8705	0.8664	0.803	0.87	0.8561
CHEMBL5469	0.6678	0.7063	0.7897	0.9526	0.9591
CHEMBL5697	0.9082	0.8865	0.8688	0.9162	0.9291
CHEMBL1250348	0.8706	0.7801	0.8157	0.9332	0.9531
CHEMBL1293311	0.6718	0.6583	0.5952	0.6367	0.682
CHEMBL1795186	0.7328	0.7146	0.8172	0.7415	0.8794
CHEMBL2189110	0.8679	0.8599	0.7946	0.8539	0.8721
CHEMBL2216739	0.9251	0.8993	0.8939	0.9067	0.8973
CHEMBL3988599	0.8712	0.8471	0.8448	0.8552	0.8551
CHEMBL205	0.921	0.8883	0.87	0.942	0.9425
CHEMBL238	0.9097	0.897	0.897	0.9191	0.9375
CHEMBL239	0.8117	0.7938	0.799	0.8761	0.8829
CHEMBL288	0.9247	0.919	0.8724	0.9308	0.9429
CHEMBL1781	0.8839	0.8806	0.8656	0.9159	0.932
CHEMBL1917	0.8187	0.8324	0.7137	0.8826	0.9129
CHEMBL2007	0.8333	0.8231	0.7731	0.8753	0.8865
CHEMBL2563	0.8557	0.8281	0.6601	0.925	0.9188
CHEMBL3286	0.8583	0.8667	0.8216	0.9155	0.9317
CHEMBL3587	0.8879	0.8647	0.8439	0.9118	0.9216
CHEMBL3721	0.6616	0.6202	0.6329	0.8245	0.8607
CHEMBL3746	0.7033	0.6545	0.5621	0.7918	0.856
CHEMBL4015	0.889	0.8722	0.8708	0.8923	0.8926
CHEMBL4072	0.8633	0.8238	0.8356	0.9213	0.9208
CHEMBL4161	0.9016	0.8923	0.8374	0.894	0.8956
CHEMBL4439	0.9062	0.8935	0.8529	0.9155	0.9131
CHEMBL4462	0.8634	0.8471	0.7981	0.8811	0.8816
CHEMBL4599	0.8215	0.8041	0.7772	0.8857	0.8956
CHEMBL4766	0.8702	0.8362	0.8112	0.9156	0.9182
CHEMBL4835	0.9415	0.9377	0.9146	0.9561	0.967
CHEMBL5491	0.9472	0.9282	0.8428	0.9469	0.9483
CHEMBL5543	0.7768	0.774	0.7061	0.8226	0.8349
CHEMBL5620	0.9145	0.9108	0.8895	0.927	0.9286
CHEMBL6164	0.8234	0.8146	0.8043	0.8334	0.862
CHEMBL1163101	0.7902	0.7525	0.479	0.9639	0.9772
CHEMBL1293289	0.8207	0.7886	0.8106	0.8037	0.8829
CHEMBL2169736	0.8233	0.8106	0.7575	0.8876	0.8858
CHEMBL3638344	0.9568	0.9563	0.956	0.9491	0.9738
CHEMBL4296013	0.8921	0.8996	0.7781	0.9237	0.9322
CHEMBL249	0.8457	0.8378	0.7906	0.8687	0.8812
CHEMBL261	0.9079	0.8997	0.8814	0.9393	0.9526
CHEMBL274	0.8997	0.8844	0.8469	0.8939	0.8944
CHEMBL338	0.8935	0.8796	0.8698	0.884	0.9083
CHEMBL1871	0.8598	0.8851	0.8344	0.9268	0.9284
CHEMBL1900	0.8769	0.8705	0.83	0.9049	0.9079
CHEMBL1929	0.9097	0.8973	0.8801	0.9425	0.9494
CHEMBL2028	0.8216	0.8152	0.7151	0.8135	0.8588
CHEMBL2207	0.82	0.7951	0.7975	0.7943	0.8529
CHEMBL2439	0.885	0.8708	0.8148	0.9049	0.9007
CHEMBL2808	0.89	0.8963	0.769	0.9167	0.9189
CHEMBL2820	0.9465	0.9358	0.8895	0.9369	0.9504
CHEMBL2993	0.9155	0.9137	0.887	0.9116	0.9343
CHEMBL3045	0.8673	0.859	0.8049	0.9143	0.9165
CHEMBL3332	0.9007	0.8758	0.8711	0.8891	0.887
CHEMBL3468	0.9009	0.8827	0.8687	0.9103	0.9082
CHEMBL3535	0.7447	0.7737	0.5965	0.9475	0.9505
CHEMBL3864	0.9141	0.9029	0.8278	0.9603	0.9618
CHEMBL3910	0.8746	0.8654	0.844	0.8712	0.8805
CHEMBL4073	0.8727	0.8401	0.834	0.9154	0.9183
CHEMBL4074	0.8986	0.898	0.8923	0.8988	0.9161
CHEMBL4128	0.872	0.857	0.8249	0.8763	0.9066
CHEMBL4662	0.9142	0.9037	0.8865	0.9229	0.9219
CHEMBL5147	0.836	0.8302	0.7914	0.8378	0.8461
CHEMBL5192	0.8594	0.825	0.8493	0.8714	0.9072
CHEMBL5408	0.8733	0.8552	0.7572	0.9473	0.9424
CHEMBL6115	0.933	0.9297	0.8972	0.9404	0.954
CHEMBL298	0.9106	0.8746	0.8699	0.8982	0.9106
CHEMBL299	0.9011	0.9002	0.9009	0.9574	0.9613
CHEMBL339	0.8338	0.7806	0.718	0.9005	0.8898
CHEMBL1856	0.9559	0.9508	0.9037	0.9606	0.9501
CHEMBL2002	0.89	0.8654	0.7197	0.9129	0.9125
CHEMBL2996	0.8997	0.8976	0.8735	0.9026	0.9073
CHEMBL2998	0.9033	0.9246	0.8942	0.9105	0.9371
CHEMBL3066	0.9362	0.9203	0.8973	0.9317	0.9327
CHEMBL3081	0.9126	0.9088	0.9117	0.9111	0.9411
CHEMBL3476	0.8786	0.8501	0.7982	0.905	0.9103
CHEMBL3524	0.8721	0.8385	0.8288	0.941	0.9417
CHEMBL3691	0.8843	0.8764	0.87	0.8851	0.8902
CHEMBL3891	0.8556	0.8369	0.8028	0.8602	0.8564
CHEMBL4102	0.8142	0.8027	0.7855	0.843	0.868
CHEMBL4117	0.7608	0.7435	0.6952	0.7401	0.7405
CHEMBL4303	0.9375	0.9332	0.91	0.9432	0.9436
CHEMBL4481	0.8417	0.8328	0.8051	0.8192	0.8631
CHEMBL4506	0.9091	0.9102	0.8653	0.9359	0.9201
CHEMBL4696	0.7999	0.7771	0.7588	0.7968	0.79
CHEMBL4895	0.911	0.8906	0.8784	0.9135	0.9212
CHEMBL4937	0.9219	0.9226	0.8903	0.9211	0.9287
CHEMBL5747	0.92	0.9134	0.8688	0.9209	0.9354
CHEMBL6136	0.821	0.7849	0.7872	0.9405	0.932
CHEMBL1075138	0.8243	0.7996	0.7658	0.9117	0.9327
CHEMBL1921666	0.9263	0.9201	0.908	0.9572	0.9535
CHEMBL2146302	0.9445	0.9396	0.9313	0.9506	0.9576
CHEMBL2331053	0.7335	0.6989	0.6635	0.8103	0.8062
CHEMBL2366517	0.8864	0.8997	0.8565	0.9103	0.9283
CHEMBL4523582	0.8895	0.8915	0.8555	0.9337	0.9302
CHEMBL241	0.8042	0.7149	0.7084	0.877	0.8777
CHEMBL254	0.9188	0.9206	0.8817	0.9308	0.9331
CHEMBL1855	0.9506	0.9454	0.9219	0.9435	0.9421
CHEMBL1868	0.8362	0.8285	0.8172	0.8936	0.9161
CHEMBL2179	0.7738	0.7187	0.6722	0.8157	0.9186
CHEMBL2345	0.9072	0.9021	0.8593	0.9089	0.923
CHEMBL2425	0.9279	0.9194	0.8573	0.9298	0.9235
CHEMBL2431	0.9066	0.872	0.8712	0.9203	0.9208
CHEMBL2593	0.9337	0.9288	0.9137	0.9246	0.9495
CHEMBL2622	0.8866	0.8856	0.868	0.8912	0.9039
CHEMBL2635	0.8364	0.8198	0.7375	0.8452	0.905
CHEMBL2828	0.9447	0.9443	0.9369	0.958	0.9652
CHEMBL2959	0.8863	0.8783	0.8345	0.9107	0.9196
CHEMBL3474	0.8607	0.8548	0.8334	0.8882	0.904
CHEMBL3475	0.7974	0.7728	0.7722	0.802	0.8307
CHEMBL3514	0.9461	0.9479	0.9326	0.9517	0.9591
CHEMBL3529	0.9034	0.8842	0.8405	0.9728	0.9783
CHEMBL3855	0.9449	0.9403	0.9223	0.9345	0.9373
CHEMBL3869	0.8921	0.8919	0.8723	0.9175	0.9173
CHEMBL3920	0.9218	0.9161	0.9015	0.9262	0.9308
CHEMBL4068	0.8894	0.8624	0.805	0.8812	0.8876
CHEMBL4093	0.8513	0.8679	0.7495	0.9029	0.902
CHEMBL4508	0.9563	0.9564	0.9476	0.9486	0.9581
CHEMBL4681	0.8586	0.8615	0.8194	0.8848	0.8939
CHEMBL4683	0.8914	0.8657	0.7643	0.9667	0.9765
CHEMBL4860	0.935	0.9313	0.9039	0.9321	0.9312
CHEMBL5366	0.8849	0.8753	0.8518	0.9662	0.9707
CHEMBL5979	0.783	0.7782	0.65	0.8983	0.9135
CHEMBL6135	0.9117	0.8942	0.6959	0.9157	0.9231
CHEMBL208	0.8909	0.8932	0.8675	0.9255	0.9322
CHEMBL209	0.9005	0.8822	0.8875	0.9521	0.9431
CHEMBL252	0.898	0.8813	0.8196	0.8824	0.8955
CHEMBL1808	0.9016	0.8888	0.8829	0.912	0.9239
CHEMBL1809	0.9431	0.933	0.8618	0.9502	0.954
CHEMBL1853	0.8759	0.8706	0.6328	0.9025	0.8996
CHEMBL1926	0.9189	0.9093	0.8543	0.9145	0.9316
CHEMBL1955	0.8061	0.7892	0.7625	0.8547	0.8457
CHEMBL2051	0.8394	0.8349	0.7895	0.8246	0.8608
CHEMBL2252	0.9019	0.892	0.8783	0.903	0.9154
CHEMBL2285	0.8875	0.897	0.8722	0.9091	0.908
CHEMBL2508	0.8848	0.8672	0.851	0.8834	0.876
CHEMBL2534	0.9382	0.9354	0.91	0.9391	0.9415
CHEMBL3116	0.8236	0.8167	0.7843	0.8513	0.8733
CHEMBL3710	0.8828	0.854	0.7488	0.9015	0.9211
CHEMBL3776	0.445	0.4513	0.553	0.9576	0.9573
CHEMBL3922	0.9064	0.8945	0.8888	0.8971	0.9161
CHEMBL3979	0.8758	0.8815	0.8853	0.9556	0.9565
CHEMBL4321	0.9383	0.9366	0.8437	0.9699	0.9722
CHEMBL4718	0.8301	0.8383	0.8127	0.9456	0.9223
CHEMBL4780	0.8992	0.8803	0.8788	0.8958	0.9114
CHEMBL4804	0.883	0.8675	0.8532	0.8846	0.8748
CHEMBL5407	0.8649	0.8562	0.8781	0.8686	0.8929
CHEMBL6140	0.9468	0.9394	0.9404	0.9374	0.9411
CHEMBL6154	0.837	0.8182	0.8399	0.8452	0.8788
CHEMBL1293244	0.8495	0.8189	0.8174	0.8738	0.8717
CHEMBL1741186	0.8598	0.8554	0.8256	0.8546	0.8747
CHEMBL1795116	0.8731	0.8452	0.8406	0.9068	0.9131
CHEMBL222	0.8483	0.8278	0.7882	0.8347	0.8506
CHEMBL236	0.9123	0.8922	0.854	0.935	0.9384
CHEMBL1947	0.9789	0.9746	0.9601	0.9725	0.9758
CHEMBL1980	0.7862	0.7823	0.814	0.896	0.9108
CHEMBL1981	0.9247	0.9019	0.8704	0.9431	0.9528
CHEMBL1994	0.773	0.7688	0.7014	0.8522	0.8782
CHEMBL2127	0.8648	0.8655	0.8462	0.8771	0.8712
CHEMBL2292	0.8671	0.8494	0.8385	0.8884	0.8971
CHEMBL2318	0.9042	0.9062	0.8566	0.9173	0.9314
CHEMBL2335	0.8928	0.8822	0.8444	0.8758	0.8906
CHEMBL2527	0.9247	0.9166	0.9083	0.9242	0.9303
CHEMBL2871	0.81	0.7998	0.6737	0.8443	0.8562
CHEMBL3229	0.8285	0.8257	0.8269	0.8448	0.8625
CHEMBL3238	0.7864	0.8077	0.6675	0.8587	0.8658
CHEMBL3563	0.8846	0.8755	0.8614	0.9003	0.9155
CHEMBL3577	0.8842	0.888	0.8273	0.893	0.9104
CHEMBL3589	0.8872	0.8749	0.8621	0.9389	0.9489
CHEMBL3629	0.9319	0.9237	0.8644	0.9398	0.9482
CHEMBL4026	0.8599	0.8563	0.8286	0.8738	0.8661
CHEMBL4036	0.8508	0.8168	0.6813	0.9065	0.9284
CHEMBL4191	0.9136	0.8997	0.8926	0.9146	0.9313
CHEMBL4393	0.9062	0.9017	0.8872	0.9294	0.9428
CHEMBL4581	0.8987	0.8934	0.885	0.9021	0.9152
CHEMBL4618	0.8307	0.8201	0.7804	0.827	0.8572
CHEMBL4803	0.817	0.8075	0.8099	0.8151	0.8387
CHEMBL5077	0.9341	0.9402	0.9234	0.9514	0.9519
CHEMBL5314	0.886	0.8836	0.8274	0.8935	0.9112
CHEMBL5462	0.9441	0.9457	0.9238	0.959	0.959
CHEMBL1075145	0.7871	0.7564	0.6484	0.8491	0.8625
CHEMBL1795177	0.8538	0.8404	0.8342	0.852	0.8565
CHEMBL3988596	0.9249	0.9364	0.9232	0.9346	0.9384
CHEMBL224	0.8424	0.8298	0.7501	0.8774	0.8841
CHEMBL227	0.9292	0.9159	0.8737	0.9448	0.943
CHEMBL233	0.8705	0.849	0.7851	0.9047	0.911
CHEMBL1825	0.8705	0.871	0.8223	0.8779	0.8877
CHEMBL1944	0.8948	0.906	0.8586	0.9368	0.9369
CHEMBL1952	0.8773	0.8562	0.8269	0.8985	0.9211
CHEMBL1978	0.8668	0.8514	0.8492	0.8873	0.8824
CHEMBL2041	0.8324	0.8081	0.7907	0.8648	0.8632
CHEMBL2108	0.8668	0.8731	0.858	0.8761	0.8757
CHEMBL2243	0.9031	0.8985	0.8967	0.9146	0.9184
CHEMBL2334	0.9364	0.9255	0.9089	0.938	0.9392
CHEMBL2487	0.9106	0.9111	0.8707	0.9236	0.9223
CHEMBL2525	0.9145	0.9158	0.8923	0.9062	0.9239
CHEMBL2652	0.9414	0.9341	0.8944	0.945	0.9589
CHEMBL2730	0.8694	0.8555	0.8291	0.8843	0.8943
CHEMBL2903	0.7168	0.7212	0.7335	0.8905	0.9136
CHEMBL3202	0.8632	0.7781	0.8013	0.8985	0.9106
CHEMBL4550	0.9289	0.9229	0.8446	0.9286	0.9251
CHEMBL4578	0.9158	0.9321	0.8814	0.9208	0.9332
CHEMBL4625	0.948	0.9324	0.9069	0.9613	0.9638
CHEMBL4801	0.9362	0.9227	0.9059	0.9518	0.9562
CHEMBL5103	0.8774	0.8634	0.7875	0.8968	0.894
CHEMBL6032	0.8559	0.8445	0.8206	0.8795	0.8844
CHEMBL1293257	0.8207	0.8003	0.7631	0.8085	0.8421
CHEMBL1293269	0.8835	0.8705	0.8554	0.8759	0.8823
CHEMBL2189121	0.9429	0.933	0.6922	0.9538	0.9664

## Sheet: Accuracy_Avg
Dataset	RF	XGB	CP	ΔCL	DΔC
CHEMBL4561	0.735867	0.740933	0.6794	0.746733	0.7332
CHEMBL202	0.813467	0.803767	0.7403	0.8398	0.850267
CHEMBL217	0.782867	0.766067	0.753667	0.846733	0.843067
CHEMBL228	0.815433	0.816167	0.791967	0.8347	0.842333
CHEMBL1785	0.8608	0.853	0.815	0.8634	0.888867
CHEMBL1792	0.7321	0.742167	0.7772	0.8638	0.883167
CHEMBL1801	0.7076	0.692	0.638067	0.8225	0.831033
CHEMBL1806	0.717933	0.719433	0.764333	0.845567	0.855467
CHEMBL1966	0.807367	0.789667	0.791633	0.849567	0.873333
CHEMBL2716	0.740333	0.732833	0.664967	0.841833	0.8236
CHEMBL2850	0.791667	0.770633	0.755767	0.818967	0.824067
CHEMBL3024	0.850567	0.841667	0.8038	0.88	0.9031
CHEMBL3234	0.769167	0.754167	0.732167	0.781267	0.809367
CHEMBL3369	0.732467	0.726	0.679733	0.7366	0.7345
CHEMBL3568	0.82	0.819867	0.809333	0.813367	0.8265
CHEMBL3582	0.777467	0.775767	0.6327	0.7798	0.803133
CHEMBL3807	0.855833	0.8408	0.7828	0.8825	0.8922
CHEMBL4204	0.865133	0.864633	0.8413	0.8635	0.860833
CHEMBL4372	0.770767	0.751033	0.654833	0.832033	0.8185
CHEMBL4588	0.8419	0.837367	0.811033	0.843433	0.8719
CHEMBL5080	0.8626	0.8447	0.845	0.865267	0.859633
CHEMBL5285	0.855667	0.8408	0.798233	0.870533	0.8725
CHEMBL5331	0.792533	0.781233	0.723567	0.793233	0.787
CHEMBL5469	0.617833	0.650667	0.736433	0.8714	0.8877
CHEMBL5697	0.833667	0.8211	0.795033	0.843133	0.859067
CHEMBL1250348	0.784	0.7202	0.7349	0.856367	0.886767
CHEMBL1293311	0.625533	0.616267	0.551133	0.592533	0.623767
CHEMBL1795186	0.682733	0.682367	0.723133	0.695033	0.814567
CHEMBL2189110	0.781133	0.7728	0.714433	0.771467	0.792167
CHEMBL2216739	0.8392	0.8169	0.819133	0.818533	0.8192
CHEMBL3988599	0.793233	0.765133	0.764767	0.7778	0.778533
CHEMBL205	0.859367	0.847867	0.794433	0.8655	0.8823
CHEMBL238	0.829933	0.819133	0.8152	0.8418	0.864867
CHEMBL239	0.7343	0.720967	0.724133	0.792	0.802133
CHEMBL288	0.844033	0.8366	0.782133	0.856867	0.8657
CHEMBL1781	0.791233	0.788633	0.776533	0.840933	0.857
CHEMBL1917	0.753933	0.764233	0.6688	0.812433	0.843867
CHEMBL2007	0.755267	0.744767	0.709433	0.799167	0.8041
CHEMBL2563	0.759333	0.736533	0.6196	0.8432	0.8381
CHEMBL3286	0.778667	0.781867	0.7537	0.8311	0.8527
CHEMBL3587	0.810333	0.795667	0.768967	0.8361	0.8541
CHEMBL3721	0.603533	0.5753	0.5908	0.7386	0.7752
CHEMBL3746	0.644833	0.611	0.516233	0.7066	0.779333
CHEMBL4015	0.803333	0.786167	0.786267	0.8076	0.816567
CHEMBL4072	0.7826	0.752433	0.756967	0.841033	0.853633
CHEMBL4161	0.831	0.820733	0.760767	0.8148	0.812533
CHEMBL4439	0.826033	0.816667	0.7702	0.835367	0.8359
CHEMBL4462	0.785367	0.7773	0.7216	0.8019	0.8056
CHEMBL4599	0.7522	0.734033	0.684933	0.808533	0.8212
CHEMBL4766	0.7871	0.757133	0.730533	0.8386	0.848467
CHEMBL4835	0.8634	0.857433	0.820833	0.881767	0.9018
CHEMBL5491	0.867167	0.854733	0.7565	0.876133	0.8841
CHEMBL5543	0.7161	0.7193	0.630367	0.749133	0.757133
CHEMBL5620	0.821667	0.819333	0.803467	0.847	0.848
CHEMBL6164	0.7475	0.739867	0.7258	0.752033	0.787267
CHEMBL1163101	0.7003	0.6744	0.480633	0.919267	0.9136
CHEMBL1293289	0.744667	0.722267	0.752267	0.736867	0.8206
CHEMBL2169736	0.740267	0.7259	0.681433	0.802967	0.8053
CHEMBL3638344	0.868267	0.866133	0.877233	0.868967	0.911767
CHEMBL4296013	0.816567	0.823233	0.706733	0.845067	0.8627
CHEMBL249	0.771567	0.755733	0.713833	0.785167	0.786167
CHEMBL261	0.8079	0.798267	0.788333	0.871467	0.879167
CHEMBL274	0.809367	0.798133	0.760067	0.810167	0.8183
CHEMBL338	0.817533	0.799133	0.790433	0.803067	0.827967
CHEMBL1871	0.788433	0.7952	0.753767	0.844533	0.855033
CHEMBL1900	0.799767	0.793167	0.746367	0.828467	0.822367
CHEMBL1929	0.808833	0.800733	0.787433	0.8654	0.875233
CHEMBL2028	0.728967	0.738133	0.650467	0.738067	0.774967
CHEMBL2207	0.758167	0.738533	0.724533	0.734267	0.7767
CHEMBL2439	0.791167	0.788233	0.723167	0.823333	0.818233
CHEMBL2808	0.811967	0.8153	0.698933	0.837	0.840367
CHEMBL2820	0.8752	0.855567	0.811867	0.866567	0.882333
CHEMBL2993	0.835867	0.837867	0.796733	0.835667	0.8603
CHEMBL3045	0.7633	0.753567	0.725767	0.834567	0.8382
CHEMBL3332	0.812933	0.783167	0.757167	0.8115	0.791533
CHEMBL3468	0.819433	0.803767	0.782267	0.8381	0.829133
CHEMBL3535	0.689733	0.722133	0.600467	0.866667	0.872
CHEMBL3864	0.8272	0.818667	0.730233	0.8879	0.898333
CHEMBL3910	0.7862	0.776933	0.7639	0.787967	0.799267
CHEMBL4073	0.790133	0.754333	0.745633	0.825033	0.8327
CHEMBL4074	0.815533	0.815367	0.803633	0.8187	0.836733
CHEMBL4128	0.788567	0.7775	0.747433	0.795367	0.829367
CHEMBL4662	0.826	0.822833	0.7973	0.8411	0.849033
CHEMBL5147	0.760367	0.756533	0.705567	0.757567	0.7664
CHEMBL5192	0.779167	0.750467	0.762967	0.7898	0.823167
CHEMBL5408	0.784433	0.780767	0.698667	0.868033	0.873333
CHEMBL6115	0.853	0.8487	0.823033	0.862	0.8902
CHEMBL298	0.825067	0.792333	0.7626	0.814167	0.827667
CHEMBL299	0.8148	0.8116	0.8071	0.893333	0.904267
CHEMBL339	0.753667	0.712633	0.675233	0.817733	0.821133
CHEMBL1856	0.892	0.887167	0.8228	0.8977	0.886667
CHEMBL2002	0.8047	0.7862	0.6619	0.829867	0.8329
CHEMBL2996	0.816767	0.820267	0.789467	0.821333	0.827167
CHEMBL2998	0.825667	0.8442	0.812433	0.8273	0.8725
CHEMBL3066	0.861533	0.848	0.815833	0.857	0.860633
CHEMBL3081	0.8327	0.8327	0.829433	0.8397	0.8651
CHEMBL3476	0.796433	0.773433	0.721067	0.8178	0.832967
CHEMBL3524	0.785233	0.7591	0.746	0.8711	0.875967
CHEMBL3691	0.809033	0.803033	0.7871	0.8043	0.8205
CHEMBL3891	0.779633	0.774433	0.7318	0.787833	0.7793
CHEMBL4102	0.747667	0.731033	0.7173	0.7727	0.800733
CHEMBL4117	0.689433	0.664767	0.626967	0.670033	0.671867
CHEMBL4303	0.8656	0.853433	0.8297	0.876033	0.8693
CHEMBL4481	0.761467	0.755533	0.730267	0.7477	0.7782
CHEMBL4506	0.8367	0.8315	0.791333	0.853	0.862333
CHEMBL4696	0.728033	0.707867	0.681467	0.7178	0.712567
CHEMBL4895	0.831933	0.813967	0.799133	0.831033	0.8506
CHEMBL4937	0.8359	0.840833	0.7954	0.843267	0.845533
CHEMBL5747	0.840467	0.8358	0.784533	0.85	0.862033
CHEMBL6136	0.7541	0.727933	0.7233	0.866533	0.863633
CHEMBL1075138	0.7303	0.717733	0.687067	0.837667	0.854767
CHEMBL1921666	0.833567	0.822067	0.821833	0.893033	0.8851
CHEMBL2146302	0.8691	0.861067	0.854333	0.873767	0.895767
CHEMBL2331053	0.652233	0.649567	0.5942	0.725867	0.7264
CHEMBL2366517	0.8072	0.817367	0.7678	0.829133	0.8481
CHEMBL4523582	0.8056	0.804733	0.768367	0.854	0.855267
CHEMBL241	0.734033	0.6645	0.6496	0.800033	0.798867
CHEMBL254	0.837333	0.8368	0.807533	0.8505	0.852833
CHEMBL1855	0.879167	0.8696	0.831567	0.873133	0.871433
CHEMBL1868	0.750367	0.739267	0.723733	0.807367	0.8381
CHEMBL2179	0.696633	0.655833	0.6363	0.737867	0.840067
CHEMBL2345	0.8268	0.8234	0.776767	0.833567	0.851933
CHEMBL2425	0.849467	0.837333	0.775167	0.8533	0.840567
CHEMBL2431	0.827467	0.8045	0.789033	0.8396	0.844
CHEMBL2593	0.849733	0.844867	0.807267	0.843833	0.8736
CHEMBL2622	0.8103	0.807633	0.782967	0.815867	0.8427
CHEMBL2635	0.737733	0.734733	0.686067	0.776933	0.827067
CHEMBL2828	0.859267	0.862	0.856633	0.892033	0.902133
CHEMBL2959	0.799367	0.7926	0.758533	0.832467	0.843733
CHEMBL3474	0.778767	0.7775	0.759633	0.806433	0.825633
CHEMBL3475	0.754867	0.7349	0.720233	0.745967	0.7623
CHEMBL3514	0.8798	0.8773	0.851067	0.8808	0.890933
CHEMBL3529	0.818667	0.7977	0.7501	0.913	0.9241
CHEMBL3855	0.8552	0.850167	0.825767	0.852433	0.851467
CHEMBL3869	0.800767	0.8057	0.790967	0.837433	0.8425
CHEMBL3920	0.8393	0.835	0.8162	0.8459	0.857467
CHEMBL4068	0.803033	0.786833	0.724833	0.803767	0.810667
CHEMBL4093	0.7672	0.781067	0.681067	0.817933	0.817967
CHEMBL4508	0.876267	0.874333	0.872833	0.875633	0.8782
CHEMBL4681	0.774067	0.785033	0.748267	0.7974	0.8081
CHEMBL4683	0.800433	0.7847	0.674433	0.911867	0.9184
CHEMBL4860	0.859467	0.8567	0.8171	0.853767	0.861467
CHEMBL5366	0.8118	0.799433	0.752067	0.907833	0.9107
CHEMBL5979	0.704967	0.7032	0.602767	0.821067	0.842933
CHEMBL6135	0.8512	0.8401	0.6421	0.8564	0.8658
CHEMBL208	0.7915	0.794333	0.768567	0.8388	0.8577
CHEMBL209	0.808733	0.8	0.795567	0.8788	0.871433
CHEMBL252	0.8241	0.8074	0.747167	0.807267	0.817133
CHEMBL1808	0.8168	0.8069	0.7903	0.834067	0.8468
CHEMBL1809	0.8753	0.861133	0.78	0.892367	0.884
CHEMBL1853	0.774967	0.778067	0.608233	0.8291	0.834333
CHEMBL1926	0.837733	0.8305	0.7731	0.834367	0.847733
CHEMBL1955	0.741167	0.722567	0.698267	0.7722	0.761067
CHEMBL2051	0.761933	0.761667	0.727633	0.744067	0.7709
CHEMBL2252	0.826833	0.8159	0.808633	0.8243	0.848867
CHEMBL2285	0.8105	0.8111	0.785033	0.828233	0.831933
CHEMBL2508	0.796967	0.783533	0.764567	0.7995	0.7873
CHEMBL2534	0.8602	0.855633	0.829833	0.8621	0.8737
CHEMBL3116	0.757867	0.755	0.717967	0.7725	0.800033
CHEMBL3710	0.779667	0.7429	0.709067	0.819533	0.826167
CHEMBL3776	0.488	0.464633	0.5316	0.875167	0.875933
CHEMBL3922	0.8316	0.8225	0.8116	0.823433	0.836033
CHEMBL3979	0.7927	0.796967	0.7981	0.883333	0.889533
CHEMBL4321	0.8464	0.838633	0.747833	0.907	0.911833
CHEMBL4718	0.783867	0.791767	0.7299	0.875533	0.852667
CHEMBL4780	0.821967	0.813733	0.798067	0.8176	0.836733
CHEMBL4804	0.803667	0.7921	0.7677	0.804867	0.8039
CHEMBL5407	0.787267	0.779733	0.795367	0.780367	0.810033
CHEMBL6140	0.869833	0.862233	0.858167	0.861733	0.8657
CHEMBL6154	0.753433	0.750933	0.7482	0.7637	0.794433
CHEMBL1293244	0.760567	0.736167	0.724567	0.791233	0.795267
CHEMBL1741186	0.774233	0.767033	0.747733	0.774767	0.802
CHEMBL1795116	0.801733	0.7767	0.768733	0.838367	0.8297
CHEMBL222	0.7608	0.750633	0.717133	0.752	0.773667
CHEMBL236	0.823767	0.799267	0.7585	0.8571	0.862633
CHEMBL1947	0.9102	0.899867	0.8767	0.9115	0.914767
CHEMBL1980	0.687433	0.7089	0.7221	0.835367	0.840533
CHEMBL1981	0.8427	0.8169	0.795933	0.8761	0.893833
CHEMBL1994	0.6953	0.6826	0.6235	0.762433	0.7862
CHEMBL2127	0.777	0.781167	0.7686	0.7925	0.792933
CHEMBL2292	0.780967	0.768467	0.761633	0.808267	0.8247
CHEMBL2318	0.825733	0.8144	0.7701	0.844433	0.858967
CHEMBL2335	0.809167	0.800933	0.7715	0.8066	0.817967
CHEMBL2527	0.844967	0.8326	0.819133	0.8454	0.855633
CHEMBL2871	0.7426	0.733167	0.621633	0.764633	0.784867
CHEMBL3229	0.740033	0.733933	0.738967	0.7641	0.774067
CHEMBL3238	0.697367	0.709867	0.611533	0.782933	0.786067
CHEMBL3563	0.798233	0.780533	0.764333	0.808533	0.831633
CHEMBL3577	0.804233	0.808633	0.761467	0.809933	0.828367
CHEMBL3589	0.816333	0.8068	0.7755	0.860333	0.873167
CHEMBL3629	0.858067	0.8461	0.775967	0.867967	0.879967
CHEMBL4026	0.791967	0.788133	0.75	0.796867	0.795667
CHEMBL4036	0.756867	0.716233	0.6398	0.833933	0.8514
CHEMBL4191	0.836433	0.823833	0.805467	0.8359	0.864267
CHEMBL4393	0.8283	0.826267	0.795533	0.852833	0.869967
CHEMBL4581	0.806833	0.806233	0.7895	0.811467	0.840667
CHEMBL4618	0.745933	0.735733	0.693833	0.740933	0.766233
CHEMBL4803	0.737033	0.7296	0.731167	0.7408	0.763633
CHEMBL5077	0.8629	0.872633	0.839	0.8839	0.883233
CHEMBL5314	0.8023	0.794567	0.749033	0.807967	0.828567
CHEMBL5462	0.878067	0.875867	0.837167	0.889333	0.893933
CHEMBL1075145	0.714467	0.674633	0.601667	0.7255	0.7661
CHEMBL1795177	0.7771	0.770867	0.744533	0.7689	0.7708
CHEMBL3988596	0.839867	0.850067	0.8258	0.8521	0.865233
CHEMBL224	0.7606	0.7598	0.683733	0.792567	0.802933
CHEMBL227	0.8525	0.8483	0.7849	0.866033	0.865667
CHEMBL233	0.788233	0.7657	0.704533	0.8298	0.8264
CHEMBL1825	0.799067	0.796733	0.744733	0.806667	0.806133
CHEMBL1944	0.809367	0.825033	0.774467	0.8553	0.861067
CHEMBL1952	0.798567	0.793967	0.756467	0.810567	0.845233
CHEMBL1978	0.7777	0.7678	0.763533	0.798567	0.808933
CHEMBL2041	0.7449	0.734233	0.708167	0.773733	0.7811
CHEMBL2108	0.807067	0.798867	0.784233	0.807033	0.7915
CHEMBL2243	0.8197	0.8142	0.812167	0.830967	0.848333
CHEMBL2334	0.862167	0.852867	0.830167	0.862967	0.8689
CHEMBL2487	0.8374	0.831933	0.783833	0.850667	0.858033
CHEMBL2525	0.830767	0.829833	0.806567	0.822	0.8478
CHEMBL2652	0.862667	0.854433	0.805967	0.870033	0.8893
CHEMBL2730	0.794333	0.7848	0.7636	0.809633	0.810933
CHEMBL2903	0.666833	0.665467	0.6783	0.8109	0.8296
CHEMBL3202	0.773167	0.721833	0.721067	0.8208	0.832767
CHEMBL4550	0.854733	0.8488	0.760733	0.849367	0.853867
CHEMBL4578	0.837933	0.861233	0.805	0.847167	0.863967
CHEMBL4625	0.869533	0.851	0.816567	0.889533	0.9007
CHEMBL4801	0.863667	0.844733	0.8216	0.8827	0.893567
CHEMBL5103	0.800233	0.779533	0.7207	0.816333	0.821233
CHEMBL6032	0.778267	0.765767	0.7452	0.7917	0.797333
CHEMBL1293257	0.744133	0.726633	0.6834	0.737133	0.750733
CHEMBL1293269	0.7966	0.7883	0.764367	0.791833	0.8067
CHEMBL2189121	0.8684	0.854133	0.6428	0.8811	0.895167

[truncated: 2 more sheets: F1_Avg, AUC_Avg]
